# Supplementary material for: Epigenetic and Transcriptomic Programming of HSC Quiescence Signaling in Large for Gestational Age Neonates
Source: Int J Mol Sci. 2022 Jun 30;23(13):7323. doi: 10.3390/ijms23137323 (PMC9267056; doi:10.3390/ijms23137323)
Supplement: Supplementary file 1 [file ijms-23-07323-s001.zip › ijms-1768160-supplementary/ijms-1768160-supplementary/IJMS_Supplemental_Tables_HSPC_LGA_052722.xlsx]

## Sheet: Supplemental Table S1
List of differentially methylated CpGs (DMC ; p-value<0.001 & abs(methylation difference)>25)
cpg_id	chromosome	poistion	methylation change (LGAvsCTRL)	p-value	adjusted p-value
547	chr1	762670	38.4483592609673	0.000484743053044603	0.129266733353284
551	chr1	762898	49.5356899246543	0.000988554023636127	0.155316922811757
556	chr1	763183	38.7147923901429	0.00095756841505017	0.154708836293724
774	chr1	859048	53.5874731627904	0.000940684779546185	0.154038257235041
1004	chr1	896322	46.8449382544442	0.000693263779299881	0.142645494186601
1091	chr1	911541	54.4440502550745	0.000129225706873735	0.0918911778039376
1230	chr1	933988	48.2455076406071	0.00019445519468999	0.103599332803464
1678	chr1	999911	51.2422295446539	0.000740999826659223	0.144960803353116
2056	chr1	1072627	41.8879994621942	0.000285689840545357	0.113814939083394
2119	chr1	1079665	61.9183659995232	7.04185257844209e-05	0.083352830616528
2213	chr1	1093941	44.5916776306399	0.000193594324158527	0.103505918364958
2336	chr1	1109220	49.528868292673	0.000203721143623303	0.104654323348366
2507	chr1	1141801	66.103185439572	4.95207399104963e-06	0.0538194298567361
2711	chr1	1173133	42.4016426579437	0.000796995598398036	0.147382316808893
2908	chr1	1208815	51.9588356119976	0.000117488001432187	0.0891986129838213
2911	chr1	1208908	56.3117908072603	5.66333604900987e-05	0.0793226784315366
3191	chr1	1259843	39.980612220745	0.000472196027222057	0.127844211883517
3364	chr1	1290038	53.6134143540417	0.000225845678393759	0.106864637298755
3398	chr1	1297483	59.658100392734	1.78969291462884e-05	0.0617946411737972
3420	chr1	1307344	54.3875458877571	0.00051863960999777	0.131963976884134
3590	chr1	1355195	52.2450884649519	0.000390639447756089	0.121955664276232
3859	chr1	1407128	37.2632265695731	0.0009421109447473	0.154038257235041
4237	chr1	1475904	62.7688336408753	4.89546383070791e-06	0.0538194298567361
4474	chr1	1534862	63.5173215169911	0.000599194623066618	0.136556234452376
4553	chr1	1551705	58.6500597409365	9.09964530104041e-05	0.085848055431924
4636	chr1	1565509	46.8945243661123	0.000813614510383234	0.147831247061051
5058	chr1	1660205	63.7247685991384	0.000127741008687072	0.0917560869925211
5259	chr1	1713717	62.8053166670692	0.000105053077391254	0.0870877777259811
5906	chr1	1951163	56.0233768475429	0.000450379804317145	0.126384450856418
6430	chr1	2080332	60.2903513286893	0.000693103882496287	0.142645494186601
6792	chr1	2159845	54.5423373874631	2.70367718467334e-05	0.0682528042951949
6806	chr1	2160250	46.2767539912068	0.000789373681564502	0.146996216772859
7104	chr1	2245964	50.4701898696362	0.000593338389400303	0.136283485304309
7105	chr1	2246017	52.7191008711195	0.00041430454389639	0.12380639069844
7118	chr1	2246818	51.739434102349	1.25277979586701e-05	0.0617946411737972
7681	chr1	2379270	33.9122438490344	0.000516560645773714	0.131694245146147
7786	chr1	2399797	41.5717026896772	0.000394661932986334	0.122353105606666
7880	chr1	2424308	39.9430635583996	0.000498218032727909	0.1305973047449
8136	chr1	2472414	54.8034856132143	0.000303323566100421	0.116271168694715
8161	chr1	2477721	59.5425150360965	0.000814409009792591	0.147831247061051
8173	chr1	2478577	54.948064724701	0.000901969936055963	0.152434333314846
8452	chr1	2559958	42.4155527148805	0.000855613479760761	0.150229467776722
8458	chr1	2560268	61.8481458963283	2.7516876967896e-05	0.0682528042951949
8513	chr1	2575211	37.6133339969665	0.000603674122615427	0.136988931389212
8653	chr1	2706638	45.5436266689407	0.000371258278112162	0.121212018213489
8879	chr1	2780550	52.7438247433401	1.70376843747707e-05	0.0617946411737972
9292	chr1	2895483	54.6033662729827	0.000662375834555142	0.140802158332071
9450	chr1	2945579	53.5775174426855	2.06480634024452e-05	0.0617946411737972
9564	chr1	2984776	52.7614243543671	0.000729436489045518	0.144190327351098
9570	chr1	2985279	45.9794249843199	2.24591516109739e-05	0.064657870971143
9574	chr1	2985482	62.2936681316645	0.000800620989360478	0.147476198725169
9597	chr1	2986521	47.8428846892416	0.000172348824468765	0.100222498159271
9598	chr1	2986554	56.0969123580063	0.000111132127106998	0.0876780153130389
9600	chr1	2986615	63.1544288119105	4.58178521152095e-05	0.075616818322804
9629	chr1	2987863	62.7829603609774	0.000849332400365671	0.150000719656264
10054	chr1	3090394	53.2534526543024	0.00056920861216857	0.135393514961026
10323	chr1	3158934	46.7902123448853	0.000976604330375884	0.155112944044541
11087	chr1	3370808	59.6688221408119	8.36059845852848e-05	0.0847295398488201
11100	chr1	3371400	50.7069361934927	0.000852844997635606	0.150118657832546
11104	chr1	3371470	60.500088348068	0.000309319737407649	0.116665080626384
11467	chr1	3448754	36.8713865773878	0.000268242644618986	0.111143836307383
11750	chr1	3514877	64.3912743376307	0.00088681429093326	0.151561777841279
11818	chr1	3528225	52.1134742703573	0.000415398366596052	0.123853516703288
11823	chr1	3528492	59.0410205920938	1.89983427643482e-05	0.0617946411737972
11968	chr1	3566441	52.3418327774109	0.000459784383447634	0.126912425733274
11979	chr1	3567647	52.1137446285311	0.000734522554176966	0.144773215240365
12076	chr1	3595136	53.6673409261284	1.70251131153021e-05	0.0617946411737972
12647	chr1	3773444	48.7310508680753	0.000101742344806637	0.0865331933167269
12658	chr1	3774384	40.6018819817899	0.000461979987280605	0.127093145625274
13730	chr1	4713961	48.6694451507881	0.000165051460222908	0.0999500659205328
13749	chr1	4714956	48.9184119190033	0.000162270841370741	0.0995152628325384
13781	chr1	4716021	51.700917005929	0.000644199062850095	0.139974460785725
13783	chr1	4716150	37.0550796771673	0.000323514832839016	0.117847133256203
13787	chr1	4716421	46.4598076974896	0.000718941693946679	0.143841660098461
13882	chr1	4771126	56.6341534819123	0.000151652682773158	0.0968589775453664
14247	chr1	5113866	53.7945337385672	0.000901666744255885	0.152417415339866
14646	chr1	5563936	51.5870358955724	0.000401845150316828	0.122635289346108
14950	chr1	5813495	49.3406072354666	8.48231233326646e-05	0.0847295398488201
15988	chr1	6239725	46.9556990023045	0.000228600293801057	0.10690428585269
16007	chr1	6240617	59.7654427690781	0.000810007925335436	0.147801798288341
16059	chr1	6265843	48.7644464950025	0.000897918370017869	0.152288961645295
16156	chr1	6296030	65.0934235751593	0.000603666980637776	0.136988931389212
16205	chr1	6305550	55.9128851602343	0.000118868722406969	0.0893363512258018
16226	chr1	6309252	51.6364419738955	7.09100077961437e-06	0.0576252792415363
16567	chr1	6419994	67.3903743237823	0.00038435123001712	0.121569019978422
16725	chr1	6480484	41.5022139424897	0.000497220383587094	0.130531985169334
16821	chr1	6507597	68.186046079888	0.000198636663528356	0.103920287618937
16992	chr1	6545748	64.79704135762	0.000138173670646276	0.0933860339547087
16996	chr1	6545851	50.8880960100257	9.96237003605829e-05	0.086416375677257
16998	chr1	6545918	51.9864141798269	7.72881018861538e-05	0.0844387612807757
17382	chr1	6673006	51.0924465072639	0.000912901754687546	0.152835797772969
17401	chr1	6674061	40.0719922066783	0.000839922221506582	0.149160979205878
17747	chr1	6844598	42.864906391349	0.0007022258002689	0.143085566969717
19087	chr1	7760665	25.0253505324653	0.000505475798205696	0.131046695702542
19443	chr1	8002801	52.4123660352897	0.000214240752024175	0.10540781292889
20220	chr1	8483541	44.8620537002631	2.04400617495306e-05	0.0617946411737972
20221	chr1	8483589	57.3236716771342	1.16592969191434e-05	0.0617946411737972
20225	chr1	8483722	47.6552587447443	0.000458218434021206	0.126868977576276
20540	chr1	8763666	56.3032401356124	0.000375351796457504	0.121212018213489
21336	chr1	9258903	51.7615070361474	1.47487820352524e-05	0.0617946411737972
21339	chr1	9259067	66.8013439642986	2.8979015128984e-05	0.0685847055607704
22112	chr1	9603002	64.9966362417252	0.000392812117137455	0.122035409219216
22383	chr1	9712172	41.9690600321118	0.000752255350893511	0.145243192916979
22388	chr1	9712452	51.1801220155279	0.000560392994031947	0.134603259108346
22786	chr1	9896089	53.7667618213617	0.000489164485594075	0.129751256695577
22918	chr1	9970349	42.1691557104441	0.000222736286920829	0.106559269848814
23156	chr1	10092976	62.1432680393373	0.000411254943243519	0.123744580905755
23392	chr1	10270588	48.5438540553132	0.000448675171440995	0.12638230018167
23589	chr1	10459521	33.9303952829676	0.000610553873720493	0.137630948474675
23590	chr1	10459548	39.0630375426103	0.000810449885945014	0.147801798288341
23591	chr1	10459619	45.8022294031378	0.000900735712447145	0.152417415339866
24125	chr1	10728151	61.7541980601461	0.00047808244584913	0.128745961550294
24229	chr1	10753998	52.2062532976855	0.000258095615939669	0.110147360576076
24592	chr1	10856337	57.9378844033884	0.00081062094680931	0.147801798288341
24605	chr1	10856879	57.2328526783475	9.94110087793635e-05	0.086416375677257
24684	chr1	10895258	54.1570258452704	0.000471181020256152	0.127813187488068
24742	chr1	10927319	40.2463265167179	0.00036838417008736	0.121212018213489
25202	chr1	11119871	46.6230226964784	0.000590033943529086	0.136277248355579
25462	chr1	11322603	48.3371684060309	0.000393722550185203	0.122167430552349
25559	chr1	11380267	60.1725042865978	0.000935254127768791	0.154007508455392
26115	chr1	11696110	53.5768269014409	0.000180351672678622	0.101682650191893
26143	chr1	11710348	65.1133535359758	9.68507455352574e-05	0.086416375677257
26196	chr1	11724492	59.1280081003165	0.000208222114914651	0.104836843948449
26293	chr1	11751280	59.0535605450078	0.000362214405353802	0.121212018213489
26309	chr1	11752312	44.9004016666502	0.000571748422577725	0.13569022584251
26784	chr1	11959110	54.7124389532183	9.48446169335232e-05	0.086416375677257
27418	chr1	12239152	41.5300699230444	0.000234414733588911	0.107728154963535
29037	chr1	13840477	35.984984125706	0.000339795510408795	0.119312634636475
29142	chr1	13909633	61.8527607967211	0.000113882187432912	0.088177634503503
29568	chr1	14289030	35.5326011221918	0.000996894762556059	0.155815064180374
29993	chr1	14925770	56.5189752301634	0.000246227404047119	0.109860934021688
30316	chr1	15214679	40.9844264684827	0.000299197120475878	0.115773029911827
30396	chr1	15251036	56.1722726520468	0.000706169535845932	0.143522537762325
30689	chr1	15392956	49.0466642195877	0.000130728669191527	0.0918911778039376
30842	chr1	15480642	66.6565748904155	9.63526951302831e-05	0.086416375677257
31229	chr1	15739487	78.2385276023461	9.90247516902505e-05	0.086416375677257
31516	chr1	15911380	39.7039052958644	0.000274457149163747	0.11217986468616
31587	chr1	15944443	49.3763468076931	0.000991020828047269	0.155392705480578
31875	chr1	16082827	50.0260647466476	0.000249712406700288	0.110147360576076
31903	chr1	16085719	55.6628009248581	0.000224761957562845	0.106821968061528
31906	chr1	16085828	45.9535315222398	0.000569021788144167	0.135393514961026
32119	chr1	16174078	75.3692438084011	1.01885239689053e-05	0.0617946411737972
32326	chr1	16302103	66.7247009094911	0.000356120711593574	0.121025037580463
32330	chr1	16302346	49.4186849942531	0.000412830861994645	0.123744580905755
32503	chr1	16375348	46.5840952298314	0.000701386697701446	0.14307080954676
32725	chr1	16472685	39.6359944443687	0.000244888894807044	0.109600764145303
32763	chr1	16482156	54.6138373337869	0.000607628444697569	0.137314200476293
32879	chr1	16531714	50.196872425421	0.000823258895517983	0.148544239370063
32924	chr1	16542989	41.4369989453793	0.000366670734153685	0.121212018213489
32930	chr1	16543909	51.7834166634727	0.000404475867574456	0.122784973324546
33139	chr1	16694234	54.8065159029214	0.000469668328376461	0.127771957048494
33355	chr1	16825832	58.8845923714793	0.000938392739851234	0.154038257235041
33386	chr1	16841283	44.8797476979243	0.000308779547873096	0.116665080626384
33617	chr1	16993945	44.8797476979243	0.000308779547873096	0.116665080626384
33744	chr1	17034341	44.7149886894778	0.000337228401527985	0.119174877026336
33807	chr1	17066510	44.7018355295784	0.00032801910515417	0.118113074473772
34186	chr1	17307020	52.5295368161903	0.000938763072826794	0.154038257235041
34936	chr1	17763944	59.6734158068659	0.000819358889338012	0.148228954154526
34961	chr1	17765277	52.1316098694801	0.000210839369527943	0.105096684813757
35145	chr1	17865974	64.0918276132915	5.11502477540825e-05	0.0761635260103299
35154	chr1	17866386	54.2560891830294	8.94409579254101e-06	0.0597862668019886
35915	chr1	18385278	49.8112400863894	0.000763001640368813	0.14571980523298
35956	chr1	18423651	49.3338307951091	0.000832078407293112	0.148853503340331
36600	chr1	18957476	47.9814372298184	0.000949439981708144	0.154279762111942
36632	chr1	18960991	63.2117644951468	0.000117113170802151	0.0891253660754419
36693	chr1	18973246	52.3449257734376	0.00096061986144413	0.154708836293724
36724	chr1	18988808	54.4509696140157	0.000413027265904983	0.123744580905755
36832	chr1	19043738	58.1500731234856	6.45492090673077e-05	0.0814928312495599
36859	chr1	19057703	52.4899607077302	0.000655703670421812	0.140409295763303
36957	chr1	19145513	67.8903603457719	3.75004461520613e-05	0.071080479133155
37107	chr1	19228331	58.2640608011924	0.000709843839815157	0.143702725667705
37260	chr1	19283335	44.5624647824398	0.000214714752477199	0.105461823553913
37261	chr1	19283380	41.7549325355087	0.000462207852123448	0.127093145625274
37397	chr1	19384760	61.1240204181138	0.000374396089433979	0.121212018213489
37663	chr1	19600683	62.6199955988868	0.000598313154591534	0.136556234452376
38238	chr1	19970328	43.5364399988101	0.00098972873397843	0.155316922811757
38588	chr1	20194916	40.4866269253277	0.000928982810696215	0.153614685691514
38606	chr1	20208621	60.8574322803576	0.00046784676650727	0.127598275753649
39258	chr1	20819904	59.3239148912071	3.88035357986716e-05	0.071080479133155
39355	chr1	20880384	60.3696220840455	2.21781096162362e-06	0.0445451473780828
39601	chr1	21023222	60.5746068127588	0.000201287194438522	0.104510277155893
39699	chr1	21058755	43.4563282395141	0.000194961830578395	0.103649809662238
39701	chr1	21058814	73.6159643889945	0.000403684113328162	0.122736065790955
39772	chr1	21113287	45.942039392211	0.000478209491682741	0.128745961550294
40346	chr1	21617094	61.1448705940846	0.000175007722235235	0.100464125899763
40754	chr1	21836263	48.3709434440889	0.000419868429692243	0.124437197144148
41008	chr1	21948655	68.1978308640894	0.000166682906209447	0.100027101007635
41142	chr1	21995762	40.6038336344232	0.000608819499801128	0.137363034609792
41260	chr1	22108497	42.6920571430376	0.000400812763578985	0.122627290829149
41267	chr1	22110077	49.854395733119	0.000365726768346702	0.121212018213489
42051	chr1	22469277	80.8636125621659	3.35115344058688e-06	0.0508999448541434
42064	chr1	22469753	58.87181819687	0.000211899537705537	0.105104815965558
42641	chr1	22890744	51.765387809815	0.000949647696805668	0.154279762111942
42665	chr1	22899489	63.4190107957148	0.000186352812421602	0.102688697105294
42755	chr1	22940543	48.6135935136744	6.37255514467307e-05	0.0814016823675666
42927	chr1	23037716	59.6140868788145	0.000449641755850507	0.12638230018167
43463	chr1	23494748	39.5782183696738	0.000552569166214144	0.134165493190695
43479	chr1	23504261	61.3741850300695	0.000209228171844375	0.10491034157423
43560	chr1	23544181	58.9009201496274	8.30857604860528e-05	0.0847295398488201
43718	chr1	23670947	53.6186906161964	0.000221848118744108	0.106471724177755
43759	chr1	23694415	54.591957400163	0.000557714996357772	0.134538504006749
43823	chr1	23730520	48.4463183664426	6.89432860224553e-05	0.082878063471685
43882	chr1	23763613	90.8369165234457	6.22566613975039e-07	0.0379997070096205
44101	chr1	23881019	50.6816894414567	0.000679129951521608	0.141628799290652
44426	chr1	24069881	48.0403347842757	0.000130420150545053	0.0918911778039376
44635	chr1	24194427	36.896505294184	0.00096888629742933	0.155095986628562
44792	chr1	24286367	51.7053814668615	0.000333553505874568	0.119051918354021
44796	chr1	24286695	55.6800422001644	0.000578562904977749	0.1359357258017
45162	chr1	24516112	48.6312190591005	0.000435703258321	0.125448473115
45318	chr1	24647897	37.161800829928	0.00099514433214051	0.155679981098302
45330	chr1	24648852	52.514122195018	5.18218351747411e-05	0.0762557604910689
46136	chr1	25196357	54.9934863557335	0.000947624838039147	0.154212409270474
46741	chr1	25573994	50.1164473170223	0.000907350464905807	0.152701658520709
46883	chr1	25665188	59.8210996061635	0.000108584684524724	0.0874525828486662
46995	chr1	25756490	52.5126244464794	0.00072899557597881	0.144190327351098
47163	chr1	25886807	44.3756066828785	0.000865795750595558	0.150734859660172
47283	chr1	25940931	58.4422409619466	7.5150601271787e-05	0.0836879043073565
47619	chr1	26147166	61.9299051798424	0.000532370764625134	0.13269530630013
47658	chr1	26185228	66.418238526694	0.000245028037345841	0.109600764145303
47689	chr1	26201815	54.0805376223244	0.000623392660616863	0.138907451201933
47752	chr1	26232405	42.8728575804795	0.000325288940657892	0.117996721578871
47758	chr1	26233046	41.8256811387369	0.000306308961065519	0.116665080626384
47781	chr1	26249306	50.4846288193729	0.000167025616430695	0.100073203263305
47786	chr1	26249690	45.5898167306628	0.000627341637096493	0.138940429520217
47788	chr1	26249809	62.787616257824	0.000284526815876096	0.113769445150748
47847	chr1	26317317	58.2441308747107	0.00058669198184185	0.136228083374549
48284	chr1	26560511	51.2920804594815	2.9627258290056e-05	0.0694612910812742
48592	chr1	26735941	63.1906215770354	7.00654721330645e-05	0.083352830616528
48594	chr1	26736014	49.6273381523489	0.000386931795838768	0.121569019978422
48595	chr1	26736602	48.8504882867874	0.000540475288659673	0.133296814813177
48756	chr1	26827726	55.4440836831722	4.34429004759854e-05	0.074262065582651
48818	chr1	26856471	39.869995246765	4.80590974850182e-05	0.075616818322804
49075	chr1	27019474	53.0735460962731	0.000669028311346873	0.141168445733588
49092	chr1	27022362	63.230747370438	3.51398593780048e-06	0.0508999448541434
49125	chr1	27024337	62.0397894936297	0.000767990041419081	0.145943849909452
49229	chr1	27114157	45.9783729588052	0.000574368250148778	0.135699471496426
49371	chr1	27154163	67.1566349843083	4.82814999652939e-05	0.075616818322804
49547	chr1	27248225	49.5479607827291	0.000225388271180121	0.106864637298755
49741	chr1	27339441	54.5431854675674	0.000166554982838145	0.100027101007635
50251	chr1	27648896	54.3507948731174	0.000354864620238301	0.120892735839856
50319	chr1	27676605	65.2880660284619	0.000349329091981879	0.120403564024019
50355	chr1	27687211	58.9657504371206	0.000111900229255923	0.0876780153130389
50862	chr1	27929704	50.8034543607885	0.000854287844704315	0.150227900510243
50928	chr1	27959676	60.2291521643311	0.000648583788363269	0.140139134349982
51012	chr1	27998712	37.8952323624202	0.000704746421296473	0.143381616693713
51195	chr1	28157513	57.9827644613735	0.000103603849134639	0.0868156072972658
52591	chr1	28995182	58.2946919575363	3.4566951862503e-05	0.071080479133155
52855	chr1	29138520	53.8131974413512	0.000126865694084996	0.0913882111653437
53304	chr1	29450760	50.0910935643019	8.0121135976605e-05	0.0847295398488201
53358	chr1	29461214	57.6449073637885	0.000630909113170232	0.139374232218558
53439	chr1	29507831	50.1459145353116	0.000217660132313192	0.10567098478928
53577	chr1	29565086	55.0577414265988	5.33843515314596e-05	0.0776119550505859
53975	chr1	30146014	32.9536592407894	0.000333708406528738	0.119051918354021
54614	chr1	30815152	54.7518060997467	0.000656701462593798	0.140482939035817
54893	chr1	31162613	48.2088544773218	0.000304575143075939	0.116480859846738
54943	chr1	31191399	53.3587797002987	0.000696917178009135	0.142854152953937
54952	chr1	31191939	65.9084339536818	0.000129478798310294	0.0918911778039376
55279	chr1	31380922	55.6249981134315	0.00011689569680822	0.0891253660754419
55622	chr1	31628307	78.7749476091868	0.000145541630783306	0.0949167899717834
55981	chr1	31885974	38.1835735069566	0.000581830560994592	0.136039462340501
55992	chr1	31886319	50.2404892133343	3.62302477375334e-05	0.071080479133155
55998	chr1	31886567	59.0055124896513	0.000372708856378772	0.121212018213489
56000	chr1	31886881	42.5957086376192	0.000251363435231539	0.110147360576076
56133	chr1	32015028	50.8742670047836	0.000766693138048369	0.145943849909452
56249	chr1	32083783	58.8462801569446	0.000999101648021491	0.155992059378227
56297	chr1	32110104	48.202471666561	0.000191762781663113	0.103377556938657
56347	chr1	32136212	56.0004643863671	0.000243710594620867	0.109490919518978
56558	chr1	32228452	66.759764530952	0.000672197457516709	0.141236487280976
56642	chr1	32254813	55.6661745818995	0.000612330202495781	0.137757009676713
56810	chr1	32396978	42.2992000308542	0.000439204172131366	0.125616854265941
56826	chr1	32403571	59.8687628025913	0.000363930265735305	0.121212018213489
56938	chr1	32479381	57.1839786435803	0.00019906335469863	0.103927453268321
57043	chr1	32538459	49.8878961837017	0.000255246913141585	0.110147360576076
57266	chr1	32688002	54.5228607304333	0.000248934964016315	0.110147360576076
57652	chr1	32892430	58.6434123310806	0.000565119975872745	0.13513670842749
57736	chr1	32966068	52.7037459282793	0.00072849248243231	0.144190327351098
57739	chr1	32966294	70.4029433448209	0.000761932801655634	0.14571980523298
57977	chr1	33116935	56.1465631576036	9.89518623362647e-05	0.086416375677257
58068	chr1	33168276	45.3122246225163	0.000506030924280195	0.131046695702542
58071	chr1	33168365	60.5974923157225	0.000189335083076629	0.103053297478098
58098	chr1	33177969	58.8475703963675	0.000694129709371913	0.142674259109737
58178	chr1	33207857	58.2225375815153	0.000614547568294902	0.137911917400402
58195	chr1	33219527	53.3379475790029	0.000897039631497065	0.152214660832931
58975	chr1	33647645	68.4261540292295	0.000200655289795647	0.104386592108056
59145	chr1	33772959	50.8379267300403	3.59071622983403e-05	0.071080479133155
59290	chr1	33896194	51.298856660212	0.000357787480961478	0.121025037580463
59849	chr1	34630125	63.8544962731385	0.000742226805188122	0.145082221734919
60328	chr1	35325400	43.4280756949847	0.000101156753402953	0.0865331933167269
60442	chr1	35394761	58.7579527954676	0.000892897355610086	0.151927086867184
60473	chr1	35396242	61.5056895859127	7.24758148659766e-05	0.0834811888218941
61078	chr1	36024266	56.333771736314	0.000977707061627085	0.155112944044541
61616	chr1	36397223	58.2832237849242	0.000643553892793747	0.139970839481612
61837	chr1	36590819	58.5518182605347	0.000337666703260739	0.119174877026336
61889	chr1	36615374	53.5194717057046	0.000499621597233429	0.130783575596751
62185	chr1	36772015	50.9646581425877	0.000977063806568145	0.155112944044541
62249	chr1	36788835	50.4053336466719	8.06253088829065e-05	0.0847295398488201
62362	chr1	36850791	43.3218906505195	0.000145894331450008	0.0950303309196598
62482	chr1	36916006	48.2379290772305	0.000839826592439605	0.149160979205878
62655	chr1	37051512	67.9067462688908	0.000134285503957427	0.0932034039129106
62662	chr1	37055734	41.8764502128921	0.000321255359428043	0.117828996362677
63334	chr1	37783697	62.2223687894902	0.00031668556471987	0.117079211586453
63797	chr1	38139566	44.9911396392429	0.000120877517601835	0.0899056012223357
63818	chr1	38157925	65.9332092776008	3.35882991886252e-05	0.071080479133155
63937	chr1	38231300	58.4719826726089	5.14128958572598e-05	0.0762481887421488
63938	chr1	38231420	54.2222386577395	0.000354242791866859	0.120777905879335
64006	chr1	38273771	51.9916759151586	0.000500148398531962	0.13081355332469
64558	chr1	38606040	60.5947816957735	0.000469017616284372	0.127686959278463
64811	chr1	38995295	60.9518584536462	0.000115765546180927	0.088974314780529
65090	chr1	39283749	45.8835373877144	0.00022689791997325	0.106864637298755
65183	chr1	39339695	75.5975267774807	1.54105776123341e-05	0.0617946411737972
65338	chr1	39456891	55.2653730662154	0.000352213137394711	0.120551609939934
65351	chr1	39457552	48.2490319690751	0.000384098276541239	0.121569019978422
65836	chr1	39874180	73.7835016974087	0.000119057228728985	0.0893363512258018
66011	chr1	39981155	40.4978364087013	0.00064701219227326	0.140136094796304
66321	chr1	40157942	57.991014457539	0.000648997802675362	0.140139134349982
66399	chr1	40236401	40.4252037944203	0.000661022664856639	0.140736731011073
66464	chr1	40254143	69.8476842671234	3.15023618040497e-05	0.0703666308911744
66638	chr1	40367260	60.1495987971813	0.000250445532480668	0.110147360576076
66643	chr1	40367391	71.4970907171227	0.00044911465225865	0.12638230018167
66650	chr1	40367848	49.1870112790533	0.000310330717926305	0.116666666525212
66998	chr1	40626940	49.8973111457767	0.000754436557108313	0.145329814874799
67005	chr1	40627388	57.1241050615707	0.000220501475735534	0.106230631511489
67610	chr1	41120053	53.7762869462969	0.000316341423466069	0.117079211586453
67611	chr1	41120099	58.8161874710404	0.000275289495180443	0.112337607505982
67727	chr1	41249480	60.1639301059574	6.27333202535662e-05	0.0811988072156874
67737	chr1	41249756	60.8619513001476	0.000546698725222523	0.134041590629513
68457	chr1	41882842	59.049673309119	0.000845653579845174	0.149580623872094
68489	chr1	41901592	64.9621515599572	3.74825507273744e-05	0.071080479133155
68855	chr1	42195547	52.2724386631669	0.000150091090900921	0.0962688337679888
69268	chr1	42800021	58.1027376417509	5.48846742344146e-05	0.0789221752465921
69409	chr1	42922279	47.3970173036227	0.000976216245688405	0.155112944044541
69525	chr1	43124107	62.2421398368201	0.000150650726000438	0.0964433151022899
69564	chr1	43148572	50.0255283046794	0.000633738642480272	0.139398578935027
69697	chr1	43233209	63.2679090769011	4.1834993968891e-06	0.0538194298567361
69723	chr1	43251033	49.4284459973989	0.000255963642671991	0.110147360576076
69764	chr1	43283147	46.4788194841852	0.000449226225211095	0.12638230018167
69927	chr1	43423686	54.8598744372803	0.000159324503369804	0.0985982760069316
69929	chr1	43423806	46.485901983364	1.96910065614949e-05	0.0617946411737972
69953	chr1	43425157	58.4398373957775	0.000638252963034731	0.139703674283474
70407	chr1	43814688	61.5064444865934	0.000367396268518534	0.121212018213489
70603	chr1	43919478	59.0696049248431	0.000386632726766415	0.121569019978422
70919	chr1	44115533	69.6951188834589	0.000242745299347706	0.109276059380956
70924	chr1	44116355	49.158176798739	0.000889622313957114	0.15166067501735
70998	chr1	44173329	51.4661888312796	1.63248886237038e-05	0.0617946411737972
71186	chr1	44399196	64.405683126529	0.000651196047452995	0.140139134349982
71263	chr1	44435899	52.9777804007734	0.000391916374853295	0.122003834194506
71334	chr1	44457343	60.7454432879869	0.000905776409090156	0.15258940598106
72215	chr1	45180863	77.9518750832868	1.05399853637737e-07	0.0379997070096205
72338	chr1	45250036	55.7788185889118	0.000757388668222819	0.145450628098595
72400	chr1	45267781	65.2018872561025	4.92656282641668e-05	0.075616818322804
72441	chr1	45279454	54.5799369305883	7.82943249134803e-05	0.0847295398488201
73218	chr1	45987629	50.3311041499248	0.000671272481242136	0.141168445733588
73459	chr1	46152795	43.7077417034135	0.000455145934252503	0.126710508105313
73557	chr1	46215859	60.368419179438	4.7269377555811e-05	0.075616818322804
73921	chr1	46632304	56.6415879691317	0.000370894233626285	0.121212018213489
74178	chr1	46768418	50.4435694252347	0.000755830746517841	0.145400292876231
74180	chr1	46768463	36.2606872114961	0.000883459370703303	0.15151805976383
74442	chr1	46908769	51.7897331834068	0.000334378828564712	0.119051918354021
74516	chr1	46951478	66.8672609878235	0.000163099446599728	0.0996187931399511
75092	chr1	47692099	54.0115710020882	0.000251804237779007	0.110147360576076
75101	chr1	47694844	48.6200570618279	0.000516881739348408	0.131694245146147
75103	chr1	47694920	50.9475077867857	0.00043499546105845	0.125388147541931
75106	chr1	47695440	51.5274799763439	0.000908679242988826	0.152701658520709
75110	chr1	47696695	43.7561487071802	0.000468256025076524	0.127663773660905
75133	chr1	47703629	57.4093289372373	0.000192469844462655	0.103491062784926
75211	chr1	47780565	70.6123361279614	0.000900278045848894	0.152417415339866
75415	chr1	47904936	53.4297271885992	0.000616756909447901	0.138141737647475
75458	chr1	47915979	60.1498125816009	0.000266184921856046	0.11083907845654
75507	chr1	47973639	53.3564806167299	0.000763350104335781	0.14571980523298
75535	chr1	47998905	60.3681614761994	0.000412792408048227	0.123744580905755
76012	chr1	48462720	54.5329476711645	0.00040579161277645	0.122839544983653
76476	chr1	49242572	64.5152134845865	0.000209140863214345	0.10491034157423
77078	chr1	50882477	44.5563676938624	0.000976401084216789	0.155112944044541
77132	chr1	50892023	49.5003341341378	0.000301619258802386	0.116079596145492
77138	chr1	50892512	32.4373955089044	0.00061409317760944	0.137899068623596
77139	chr1	50892539	31.4905769100293	0.000965918040197599	0.154974468318246
77702	chr1	51762792	55.3490073175965	0.000363812474169861	0.121212018213489
78029	chr1	52195040	52.7597158672483	3.15979710359068e-05	0.0703666308911744
78035	chr1	52195605	55.3217735958188	1.97230284664559e-05	0.0617946411737972
78237	chr1	52456453	58.810091251244	0.000137377454261039	0.0933860339547087
78287	chr1	52498680	49.2131055372975	0.00067578952579696	0.141479329589413
78289	chr1	52498834	54.4510647410334	0.000230767461188289	0.107265000890151
78317	chr1	52521910	57.6127690755349	0.000557948637977844	0.134538504006749
78795	chr1	53018919	37.3331553934602	0.000901187242354725	0.152417415339866
79043	chr1	53192344	53.4764461066103	0.000164072624966945	0.0998104414675834
79182	chr1	53308933	47.6220874542245	0.000843635733479689	0.149478011363654
79318	chr1	53393585	52.0867815235962	0.000926908654040805	0.153484809750004
79321	chr1	53393901	52.6076392671115	0.000428898982758862	0.125182076207955
79427	chr1	53528305	67.2689350885039	0.000170084004993574	0.100222498159271
79611	chr1	53647852	57.0791611948833	0.000384064116090476	0.121569019978422
79630	chr1	53662650	75.7682769355926	3.59512262682076e-05	0.071080479133155
79849	chr1	53792516	65.4005354131259	0.000660924945224806	0.140736731011073
80353	chr1	54129981	31.1326884484097	0.000878964066720056	0.151358112610461
80440	chr1	54204443	53.3102025910947	0.000648826237473172	0.140139134349982
80644	chr1	54411976	54.7333175694447	0.000346431392428815	0.120059765147344
80746	chr1	54518493	48.9246692247023	9.78209594582694e-05	0.086416375677257
80809	chr1	54587078	59.8236768461668	0.000169176431343323	0.100073203263305
81250	chr1	54871161	66.7106656719015	2.05295521060308e-05	0.0617946411737972
81262	chr1	54871889	46.2883774616642	0.000909119718551211	0.152719772640317
81385	chr1	54940608	45.0334699036736	4.3787556046005e-05	0.074262065582651
81514	chr1	55007746	46.9844235219494	0.000313048677710738	0.116958402503846
81518	chr1	55007891	59.6876085392723	0.000264394303938968	0.110642066403348
81785	chr1	55181382	53.5504720300309	0.000465230479032283	0.127314129973396
83894	chr1	59012485	43.3289832938781	0.000165237819107687	0.0999500659205328
83918	chr1	59042754	50.1576040610256	0.00086920438226446	0.150952227629927
84364	chr1	59762490	49.364957189677	0.000886124308746	0.151561777841279
84678	chr1	60539443	49.7257585588759	1.88173067403456e-05	0.0617946411737972
85054	chr1	61508969	54.0739669376576	8.2668989149122e-05	0.0847295398488201
85056	chr1	61509095	75.9311403694997	3.01318628209308e-07	0.0379997070096205
85125	chr1	61543002	59.2232394262526	9.0955740932666e-05	0.085848055431924
85538	chr1	62208245	39.9350963031208	0.000936342991272231	0.154007508455392
85880	chr1	62660752	63.3902713210316	0.000257411482008056	0.110147360576076
85882	chr1	62660872	64.9169708698496	5.30866558338758e-06	0.0538194298567361
85883	chr1	62660927	52.5669502154295	0.000753121557324602	0.145257427640834
86143	chr1	62901778	48.1601241655237	0.000695711304567945	0.142854152953937
86152	chr1	62902849	47.5787274599559	0.000857049314962028	0.150284066495629
86395	chr1	63249794	48.2401297561537	0.000386099305535215	0.121569019978422
86719	chr1	63783533	58.5988159425686	0.000164880011348655	0.0999500659205328
86742	chr1	63787319	57.0923024830239	1.40473947491504e-05	0.0617946411737972
86842	chr1	63833162	49.6841022945371	0.000427585557244514	0.125177825292704
87610	chr1	65011027	49.4308761794303	0.000208711339458178	0.104900901840151
87896	chr1	65468559	54.725806794833	0.00040033363518774	0.122627290829149
88278	chr1	65886440	47.1772084619041	0.000421864512069742	0.124574963829081
88326	chr1	65991631	57.8024441305038	0.000126388387795275	0.0913081679014096
88435	chr1	66258516	48.5531273657115	0.00016815338550113	0.100073203263305
88857	chr1	67390666	50.6356971324939	0.000633894566812485	0.139398578935027
89164	chr1	67896900	49.4569892709086	0.000579291026616472	0.136017830523042
89328	chr1	68150956	58.3967334079031	0.000456943934613849	0.126868977576276
89329	chr1	68150993	54.6359467380703	0.000394278297948336	0.122289609592619
89393	chr1	68219961	45.0382175346216	0.000807426690635875	0.147649579074504
90747	chr1	71546558	69.0608087099033	2.82077102941869e-05	0.0682528042951949
91608	chr1	74663986	46.8022645705755	0.000396449202024175	0.122509943730377
91926	chr1	75601058	51.9933401454779	0.000750122088525498	0.145243192916979
92150	chr1	76190667	49.4344385982263	9.50977327809748e-05	0.086416375677257
92628	chr1	77333208	41.829538461305	0.000343301921113188	0.11976398456927
92637	chr1	77334133	61.5447529026332	0.000414780107672569	0.12380639069844
92802	chr1	77746683	41.6874444836654	0.000450013843262767	0.126384450856418
93120	chr1	78245153	72.0853139038634	6.57902973912679e-05	0.0814928312495599
93229	chr1	78353945	59.8643955524816	1.93928732094738e-05	0.0617946411737972
95826	chr1	85462515	57.5972502723229	0.000807716126013708	0.147649579074504
96173	chr1	85931091	41.5268605334394	0.000663229454120766	0.140802158332071
96232	chr1	86046501	64.9505249185537	3.64488241676563e-05	0.071080479133155
97140	chr1	87793935	62.4016203051266	0.000260814735925754	0.110220993755928
97167	chr1	87797200	58.4183900191428	7.43997756609878e-05	0.0836282568638812
97179	chr1	87800837	70.2245544758559	0.000248174855258398	0.110048922083388
97828	chr1	89357144	64.6257166038185	0.000715864340845032	0.143702725667705
98243	chr1	90223038	47.740325350364	0.00045904964337598	0.12691208056109
98299	chr1	90286397	69.6704215047768	1.68379341805566e-05	0.0617946411737972
98302	chr1	90286482	58.0905775152449	0.00071089471220667	0.143702725667705
98304	chr1	90286527	48.6756723894166	2.59403275537131e-05	0.0675281290360419
98320	chr1	90287362	58.3019680095591	0.000560030558344465	0.134603259108346
98335	chr1	90309032	51.9869130639497	0.000265127378427949	0.110642066403348
98447	chr1	90461061	55.4796369259578	0.000477963435361564	0.128745961550294
98778	chr1	91195238	66.8005063966331	0.000574663393573814	0.135699471496426
99688	chr1	92545865	57.6251794887243	0.000509735617090742	0.131067853932538
99816	chr1	92765049	50.5354098878349	6.1313073611765e-05	0.0811255427447742
99930	chr1	92948268	41.6847227628918	0.00044669624184221	0.126217121744661
99931	chr1	92948306	42.9705536689425	0.000803570048085819	0.147476198725169
99977	chr1	92952410	59.4318303318656	0.000691230501371564	0.142645494186601
100205	chr1	93297655	42.6577470119236	0.000521215179060139	0.132066164944418
100208	chr1	93297985	69.3797889727163	0.000228838563972003	0.10690428585269
100210	chr1	93298224	52.5377549744162	0.000870668737925084	0.150963440741966
100286	chr1	93427143	58.0286145588256	2.8874609161166e-05	0.0685847055607704
100388	chr1	93544968	62.4837693335158	0.000510353642459624	0.131137435553331
101362	chr1	95006946	48.0273900551022	0.000479608114693418	0.128850901648974
101381	chr1	95008046	52.2185506205365	8.85487199390703e-05	0.0852099737442887
101550	chr1	95285823	75.6004153343663	6.14236946987217e-08	0.0379997070096205
101560	chr1	95286116	51.8449840682879	0.00016916156739516	0.100073203263305
101786	chr1	95582947	44.9642700414771	0.000999930767890268	0.155992059378227
101790	chr1	95583084	63.9271563605215	0.000105029239009404	0.0870877777259811
102798	chr1	98510938	56.6900977291085	0.000564140949113861	0.135116589738412
103609	chr1	100503919	45.3804470405203	0.000728960360897849	0.144190327351098
103674	chr1	100598444	47.9978729273996	2.32716263328259e-05	0.0653934389710673
104029	chr1	101361797	60.2425460807092	0.000529462421604235	0.132353508411956
104769	chr1	103573990	56.9692883648353	0.000188933230263214	0.103053297478098
106824	chr1	109289371	56.8612877436172	0.000175647654137057	0.100471870282559
107123	chr1	109618754	51.6671086126315	0.000662657881649826	0.140802158332071
107162	chr1	109633463	55.5393151558239	0.000353135283913815	0.120630214036353
107355	chr1	109756704	44.5073087695741	0.000767261939279559	0.145943849909452
107513	chr1	109825890	66.8659151933009	0.000326154657794971	0.117996721578871
107679	chr1	109969028	79.3968702225792	0.000138278426224526	0.0933860339547087
107682	chr1	109969419	42.514694169567	0.000120144838755359	0.0895370812106827
107806	chr1	110052237	41.3313590286344	0.000802802444765259	0.147476198725169
107811	chr1	110052487	48.8453644221531	0.000227829225679077	0.10690428585269
108071	chr1	110283082	65.8774329377022	0.000872255504644561	0.151065088409457
108074	chr1	110283343	49.8148135337005	0.000569414171637372	0.135393514961026
108325	chr1	110528132	61.8069773432258	0.000116485413027548	0.0890065276743928
108447	chr1	110613044	48.2785033805767	0.000381693943929735	0.121504688416643
108464	chr1	110625830	52.8695578901551	0.000300122058061361	0.115952633272427
108554	chr1	110693758	48.2886882112123	0.000216962814601923	0.105651518034031
108940	chr1	111021786	57.2925993084999	0.000259773226668216	0.110220993755928
109153	chr1	111217969	54.6453942837707	0.000249915000735601	0.110147360576076
109154	chr1	111218003	61.5650553070382	2.06135669477862e-06	0.0444623448841692
109188	chr1	111293034	50.4319547973936	0.000569601464923575	0.135393514961026
109381	chr1	111746585	50.1863926510971	7.13179785463788e-05	0.0833828448818227
109760	chr1	112281788	58.343554259016	3.51878977359124e-05	0.071080479133155
109903	chr1	112431784	52.8918685514024	4.63508794420805e-05	0.075616818322804
110024	chr1	112533310	49.9330326913176	0.000370824683311178	0.121212018213489
110369	chr1	113044624	44.264119723803	0.000780248409832977	0.146458929582247
110633	chr1	113249688	41.205366781787	0.000794375258006491	0.147254257851004
110697	chr1	113261795	53.6486531957439	0.000347114535332385	0.120059765147344
110729	chr1	113286441	53.9135701352206	5.54960448183423e-05	0.0790060188212629
110928	chr1	113393127	56.1929197329323	0.000207288407614347	0.104836843948449
111102	chr1	113498374	57.9475488694477	0.000137815095454911	0.0933860339547087
111543	chr1	113932696	50.3748527955153	0.000171884455876107	0.100222498159271
111546	chr1	113932990	53.6872606660164	7.63373622031329e-05	0.0841048910701593
111548	chr1	113933086	70.2065273934193	3.22808533886835e-05	0.0710052283084839
111549	chr1	113933258	62.3073657846528	2.2596156937015e-05	0.064657870971143
111554	chr1	113933497	55.0040219360872	0.000100061601134151	0.0864727613361026
111712	chr1	114301636	40.9041880029368	0.000146360549662735	0.0951697813242363
111752	chr1	114354311	37.5630072610131	0.000837393271451535	0.149090517836639
111898	chr1	114481072	38.6004640902698	0.000718269297089104	0.143831235734953
111929	chr1	114526070	64.0291673628529	0.000289936905732345	0.114239226608259
112312	chr1	115053962	58.5823598781494	0.000848837984871167	0.150000719656264
112481	chr1	115259441	75.9799103664388	6.81831872232838e-06	0.0576252792415363
112511	chr1	115323077	55.8032145113843	0.000470784013959876	0.127813187488068
113075	chr1	116381346	63.4211165884455	4.72573139690698e-05	0.075616818322804
113288	chr1	116710332	57.8675127660206	9.40303034627034e-05	0.0864089093059439
113394	chr1	116915470	59.6541733347052	0.000165423654497006	0.0999500659205328
113681	chr1	117210536	61.1981312334457	0.000284478394993383	0.113769445150748
113744	chr1	117299914	50.7306852947807	1.1376990714886e-05	0.0617946411737972
114209	chr1	117910046	52.9685031837596	0.00093946135430307	0.154038257235041
114442	chr1	118321475	56.9262162446027	0.000409968312071861	0.12363681911732
115538	chr1	120611758	34.1704125468317	0.000260844727841442	0.110220993755928
115954	chr1	142619133	34.1785571265712	0.00060552547847803	0.137111564185032
116082	chr1	142890764	37.4309364147096	0.000597082041143677	0.136534070915854
116465	chr1	143743566	34.8505506557946	8.65448920976261e-05	0.0851707091761143
116471	chr1	143744093	42.6177454519493	0.00033681669484581	0.119174877026336
116481	chr1	143744896	39.5837921163419	9.7468564030571e-05	0.086416375677257
116521	chr1	143913890	47.5599560472372	7.29161156726461e-07	0.0379997070096205
116750	chr1	144339891	34.8505506557946	8.65448920976261e-05	0.0851707091761143
116766	chr1	144341236	39.5837921163419	9.7468564030571e-05	0.086416375677257
116925	chr1	144593958	57.4720504176567	0.000632108880033981	0.139374232218558
116927	chr1	144594077	72.8870015792336	0.00012904910104534	0.0918911778039376
116935	chr1	144604743	45.1023668978957	0.000383339955136251	0.121569019978422
117029	chr1	144931501	67.3911069466155	1.57534328353084e-05	0.0617946411737972
117031	chr1	144931887	46.80865222409	0.000708877525222763	0.1436654010722
117611	chr1	145548958	76.666076207662	9.30552109042149e-05	0.0860910090969729
117720	chr1	145611295	36.1308031254123	0.000240898430322978	0.108834047218525
117941	chr1	145827039	44.4250171022036	0.000841980914351105	0.149331933300967
118059	chr1	145990591	59.0312082649759	0.000130712075545236	0.0918911778039376
118151	chr1	146080070	50.276749102776	0.000691569800255896	0.142645494186601
118307	chr1	146374416	59.6067654687097	0.000599057583707157	0.136556234452376
118472	chr1	146643694	55.556343326169	0.000980712691511451	0.1552084887862
118551	chr1	146714856	76.6208211096918	7.70555674469031e-06	0.0587592288770283
118728	chr1	147071061	48.0626741491798	6.67357445474942e-05	0.0816905840998498
118980	chr1	147400541	44.4232154795239	0.000842003014916378	0.149331933300967
119157	chr1	147532335	59.0312082649759	0.000130712075545236	0.0918911778039376
119250	chr1	147621906	50.276749102776	0.000691569800255896	0.142645494186601
119397	chr1	147781053	59.1436193083596	0.00098003055032806	0.155188675206257
119414	chr1	147790256	54.490479734881	0.000666770107888287	0.141073420981192
119560	chr1	147931089	34.8505506557946	8.65448920976261e-05	0.0851707091761143
119576	chr1	147932425	39.5837921163419	9.7468564030571e-05	0.086416375677257
119645	chr1	148176674	39.5837921163419	9.7468564030571e-05	0.086416375677257
119656	chr1	148193243	61.0273935186989	0.000101233500250279	0.0865331933167269
119751	chr1	148355994	45.1451242024566	0.000384498172451114	0.121569019978422
119804	chr1	148556264	57.4720504176567	0.000632108880033981	0.139374232218558
119988	chr1	148901957	42.4803413546543	0.000384227714944915	0.121569019978422
120226	chr1	149193573	55.9153262446869	0.000207874207136954	0.104836843948449
120337	chr1	149261214	41.0406353702651	0.000591815043053018	0.136277248355579
120403	chr1	149313013	30.3507737848269	0.000498844595246871	0.130668981441279
120424	chr1	149333909	41.7426648322529	0.000132111798090136	0.0924330786320522
120662	chr1	149646816	41.0406353702651	0.000591815043053018	0.136277248355579
120727	chr1	149698542	30.3507737848269	0.000498844595246871	0.130668981441279
120749	chr1	149719438	41.7426648322529	0.000132111798090136	0.0924330786320522
120824	chr1	149803943	43.6247671022529	0.000104179023389401	0.0868774652056293
120825	chr1	149803987	52.5752633978356	8.7587165020442e-05	0.0852099737442887
120927	chr1	149832960	53.151891910216	7.6006341917433e-05	0.0841048910701593
120928	chr1	149833004	43.6221015639811	0.0001075756130169	0.0873249087209264
121138	chr1	149982655	61.0508587171042	0.000167571254293844	0.100073203263305
121267	chr1	150122989	55.9560854011174	0.000287846552636758	0.114003891681653
121391	chr1	150208088	66.9714121994488	8.1612650177589e-05	0.0847295398488201
121437	chr1	150241164	62.2621381088183	6.73826169929417e-05	0.0819150184043453
121440	chr1	150241471	64.8245787734081	4.02452903984111e-06	0.0538194298567361
121543	chr1	150293999	93.0076728161505	7.22093178883206e-07	0.0379997070096205
121544	chr1	150294057	52.9237421534379	0.000489763233678179	0.129767151425176
121869	chr1	150522809	61.9768045295559	6.82677803389092e-05	0.0827246608010162
121938	chr1	150551114	60.7822918068519	5.25556426668658e-05	0.0768912478181002
122042	chr1	150602319	65.2916938143005	0.000292038223689764	0.114767504211392
122480	chr1	150947673	50.0690156640474	0.00021856863558245	0.105839793860741
122907	chr1	151171566	65.5117698115492	2.33012488336247e-05	0.0653934389710673
123158	chr1	151319735	37.1642439192112	0.000766928674730187	0.145943849909452
123161	chr1	151319866	78.6907573725768	2.41121408815214e-05	0.0669228037787789
123419	chr1	151513166	59.0601457662773	0.000339545052033411	0.119312634636475
123670	chr1	151689588	45.4497900037747	0.000901093377416605	0.152417415339866
123729	chr1	151736181	56.6268734217983	6.97470210840212e-05	0.083352830616528
123999	chr1	151966180	62.1074979477367	0.000887169153579087	0.151561777841279
124042	chr1	152008900	57.9343632341396	1.11839496460621e-05	0.0617946411737972
124107	chr1	152082220	46.1040701976111	7.93973767815866e-05	0.0847295398488201
125107	chr1	153631685	49.9719570801038	0.000398590767560427	0.122627290829149
125121	chr1	153643086	59.9465979075607	6.30289404308378e-05	0.0811988072156874
125307	chr1	153748790	55.9894578578411	0.000285057777883005	0.113801667538337
125581	chr1	153918593	42.5314039980305	0.000976754281575463	0.155112944044541
125650	chr1	153941158	63.806593166824	8.23188861488753e-05	0.0847295398488201
125981	chr1	154192857	37.2421837990145	0.00037527717779455	0.121212018213489
125993	chr1	154193957	62.4845229929583	0.000860181290705918	0.150432900398692
126260	chr1	154377645	65.6165567233882	6.11133815574447e-06	0.0542781014735803
126409	chr1	154464882	50.0057359336758	0.000804788800795283	0.147476198725169
126629	chr1	154599867	57.4638058397596	0.000368506223302985	0.121212018213489
126631	chr1	154600033	52.3159641889727	0.000452328844161251	0.12654383888015
126794	chr1	154733199	38.4437680417855	0.000560243146319875	0.134603259108346
126955	chr1	154842970	46.2774432101188	0.000433444686517407	0.125344496099717
127116	chr1	154946772	43.6649361060511	0.00080491986973115	0.147476198725169
127117	chr1	154946818	53.2993643652948	0.000636700210812103	0.139654803553154
127325	chr1	155024771	61.0105974019692	2.74655761927886e-05	0.0682528042951949
127406	chr1	155052947	71.8199117725257	1.34325227305547e-05	0.0617946411737972
127418	chr1	155053664	55.7374005954005	0.000268686445356032	0.111143836307383
127715	chr1	155162772	49.1390491655052	0.000299812749814981	0.115951813027958
127722	chr1	155163571	51.1884676348268	0.000521077748071462	0.132066164944418
127868	chr1	155225143	61.6625894713809	8.38825242009468e-05	0.0847295398488201
127869	chr1	155225235	51.2530373200873	6.02458426655582e-05	0.0811255427447742
127926	chr1	155247402	70.0652261198287	0.000589934130517223	0.136277248355579
128024	chr1	155290760	42.0747795897473	0.000344438939749396	0.11994307877977
128060	chr1	155294256	44.3033605722442	0.000367174868726435	0.121212018213489
128063	chr1	155294415	48.3200314570525	0.000142224189472653	0.0940816785024546
128996	chr1	155948179	42.7220627667726	0.000337198274799745	0.119174877026336
129181	chr1	156025158	46.8154985817688	8.74616174758021e-05	0.0852099737442887
129232	chr1	156052424	59.3901277801033	0.000228832853716885	0.10690428585269
129354	chr1	156117824	42.2804871323717	0.000658933321832421	0.140601806552931
129591	chr1	156252758	62.1361613896993	8.4825338084459e-05	0.0847295398488201
129856	chr1	156390113	47.5403453933078	0.000649674477111495	0.140139134349982
129867	chr1	156391031	69.4561433495404	0.000308334133246191	0.116665080626384
129869	chr1	156391174	57.4745019666173	0.000249311003779367	0.110147360576076
129871	chr1	156391295	60.6772670815967	0.000564815150924528	0.135126586544801
129892	chr1	156405340	55.954676966676	0.000501587211660451	0.130872992985053
130010	chr1	156470936	47.8022944054601	0.000427799082638251	0.125177825292704
130011	chr1	156470994	46.6688345099212	0.000921786080612563	0.153164005634901
130020	chr1	156474660	48.0654892848369	0.000573542970600849	0.135699471496426
130291	chr1	156616536	58.9217168686543	0.000135235697972796	0.0933860339547087
130317	chr1	156627872	59.5549646486811	0.000411816644723816	0.123744580905755
130349	chr1	156646690	58.5341603909942	7.27455158499942e-06	0.0578082579222652
130551	chr1	156737857	61.0973295909616	2.62314081948227e-05	0.0678181617120742
130942	chr1	157015912	37.3983530977426	0.000880964679964616	0.151358112610461
131107	chr1	157163672	50.6040164662469	0.00071584322335989	0.143702725667705
131172	chr1	157258370	45.2719197795443	0.000743017310123684	0.145082221734919
131226	chr1	157385739	47.394219663449	0.000707798592449959	0.143562358731016
131509	chr1	157949053	55.7580115144252	0.000232787427117058	0.107616929051382
131654	chr1	158083199	57.1452658810827	0.000708601926328102	0.143648109786466
131670	chr1	158087775	54.7278810079198	0.000147962655423408	0.095634927586857
132122	chr1	159158036	64.3252104831678	0.000984193681158037	0.155299661513043
132364	chr1	159751097	52.1760576049708	0.000248149693115774	0.110048922083388
132546	chr1	159907620	58.515034675574	0.000181879338115921	0.102001349210582
132707	chr1	160068318	35.7761062921656	0.000639177941308496	0.139703674283474
132888	chr1	160254444	43.5357061945644	0.000983013061188156	0.155299661513043
133012	chr1	160370586	38.4569240939012	0.000647279197461039	0.140136094796304
133540	chr1	161068346	42.5907379215189	0.000692961488719723	0.142645494186601
133654	chr1	161129570	42.7586214921415	0.000816713749558919	0.148034220328515
133697	chr1	161147254	50.2608833364133	2.7899583396045e-05	0.0682528042951949
133818	chr1	161228870	52.3805112229103	0.000337441065196298	0.119174877026336
133893	chr1	161284186	46.7664630223997	0.000624952388950808	0.138919714943507
134012	chr1	161370004	53.6556165091942	5.06976586631538e-05	0.0759389566512566
134638	chr1	161697131	45.8329158676309	0.000423908605347248	0.12474665847699
134643	chr1	161697367	53.654091442028	6.12886109425222e-05	0.0811255427447742
134835	chr1	162039589	46.897216192885	0.000745361985306945	0.145114889203971
135407	chr1	163039185	53.174936037308	0.000975641528599257	0.155112944044541
136408	chr1	165345358	43.8359809102037	0.000520900414782767	0.132066164944418
136584	chr1	165600879	44.9653908062071	0.00040535305882483	0.122798390871464
136690	chr1	165738135	59.5654269883114	0.000245063575184052	0.109600764145303
136941	chr1	166134823	52.951865311212	0.000537864227212238	0.133102257774279
136950	chr1	166135715	57.226704449851	0.000101456200154612	0.0865331933167269
137267	chr1	166845570	53.8455193199641	0.00030813584375611	0.116665080626384
137302	chr1	166890560	63.471921597682	7.19918803346794e-05	0.0834729443037901
137365	chr1	167013333	66.3163453057326	3.10468336306513e-05	0.0703666308911744
137506	chr1	167189751	48.7094591424372	0.000119114032708898	0.0893363512258018
137648	chr1	167408460	69.8845412447856	2.54563269004527e-05	0.0670738535364482
137680	chr1	167424563	59.2835434047534	8.23582896923771e-05	0.0847295398488201
137842	chr1	167572355	57.8870643011345	0.000844362166417701	0.149492301748565
137881	chr1	167599931	58.5612976523293	0.000240388925607814	0.10878810425692
138146	chr1	167905068	49.8004725484772	0.000660894632965182	0.140736731011073
138295	chr1	168105871	55.9792463732325	0.000156039856604782	0.0978399709190239
138300	chr1	168106072	42.197900109484	0.000383514918445716	0.121569019978422
138345	chr1	168148118	51.8786098874414	0.000414399709565101	0.12380639069844
138759	chr1	169063507	34.5836894393307	0.000366781176155358	0.121212018213489
138793	chr1	169080508	49.2640788050838	0.000452680108009991	0.12654383888015
139428	chr1	170630172	54.4139639011847	0.000748139439767152	0.145114889203971
139458	chr1	170637618	50.650640909157	0.000564105065302997	0.135116589738412
139805	chr1	171454977	51.6989135359933	0.000585424014758111	0.136228083374549
140045	chr1	171750649	48.1811678955982	0.000531231121378993	0.132576146014468
140233	chr1	172292085	35.0356256926208	0.000732191755504695	0.144473145367202
140422	chr1	172668542	58.8150135744759	0.000332679601774383	0.118932403167518
140784	chr1	173639037	58.6683243152691	0.00062529938893816	0.138919714943507
141984	chr1	175462806	59.0019470326726	0.000106473287215855	0.0872887319778274
142042	chr1	175568532	38.1316553033372	0.000534819003781505	0.13290439184487
142492	chr1	176527596	46.964246803739	0.000386458325457057	0.121569019978422
142776	chr1	177150656	45.1553087096669	0.000566237920455095	0.13523269836352
143169	chr1	178063821	51.9032257570915	0.000712718323091499	0.143702725667705
143436	chr1	178512298	41.0288042979008	0.000165832394331834	0.0999500659205328
143704	chr1	178973522	61.3455385647938	0.000322609567699721	0.117828996362677
144838	chr1	180200102	50.6350614746673	0.000395007193063384	0.122353105606666
145047	chr1	180471818	41.9230854593355	0.00088072795322431	0.151358112610461
145147	chr1	180601615	46.7731072716225	9.06073544610704e-05	0.085848055431924
145454	chr1	180991201	58.4078859733194	0.000321394341252551	0.117828996362677
145548	chr1	181058894	56.4324503565532	1.16336028446058e-05	0.0617946411737972
145676	chr1	181159215	51.2982951235289	4.97099731898075e-05	0.075616818322804
145829	chr1	181451681	45.7664254788556	0.000788097449678745	0.14693034622667
145842	chr1	181455108	60.4880933731622	0.000778727271049235	0.146382704302399
146100	chr1	181999159	61.147822357729	0.000766296889363987	0.145943849909452
146362	chr1	182365979	62.0676194989747	0.000214325538156263	0.10540781292889
146508	chr1	182583220	56.6090579721807	0.000300527450626604	0.115990536211142
146521	chr1	182592477	52.0677047106157	0.000191421777035019	0.103377556938657
146797	chr1	182922176	56.2466221806527	5.52789057171271e-05	0.0790060188212629
147221	chr1	183441902	43.4323454443658	0.000533656365300117	0.132860714368567
147539	chr1	184006497	49.8847905851215	0.00023395068818526	0.107728154963535
147573	chr1	184079615	63.4419494590513	0.000942771335834268	0.154038257235041
147711	chr1	184355676	49.9782730578458	0.000775100660268999	0.146286879139384
147917	chr1	184723988	52.7144742857433	0.000670301582955262	0.141168445733588
148109	chr1	185014876	51.0122233060516	0.000321634161370414	0.117828996362677
148114	chr1	185015172	43.0153840580307	0.000251823399109199	0.110147360576076
148283	chr1	185287311	51.8529187393349	0.000521746985030072	0.132066164944418
148937	chr1	186948003	63.4056340565672	0.000260673050303193	0.110220993755928
150895	chr1	193029156	58.8522073102755	7.07723978054456e-05	0.0833813615994613
152390	chr1	197744177	60.7001224239084	0.000122963885427875	0.0902900419885164
152392	chr1	197744316	50.2092423393499	9.83764706593221e-05	0.086416375677257
152489	chr1	197880904	46.4912586482714	9.60240703206018e-05	0.086416375677257
152499	chr1	197881944	51.1170634489896	0.000603049823306787	0.136988931389212
152522	chr1	197887213	66.1022341531459	0.000612572912603571	0.137757009676713
152531	chr1	197888848	58.6174327956005	0.000260208223332642	0.110220993755928
152862	chr1	198906459	54.2306661070209	0.000174266175170108	0.100350067038402
153297	chr1	200010527	58.6247630257227	0.000638884007044996	0.139703674283474
153590	chr1	200378839	48.6653178346299	0.000515120842288103	0.13159408863762
153597	chr1	200379206	42.506175232077	0.000585725125338839	0.136228083374549
154043	chr1	200869004	55.4734836756947	0.000438189065430339	0.12555374264843
154239	chr1	200990764	62.1482006213466	2.75723636550436e-05	0.0682528042951949
155089	chr1	201619429	50.7779733399333	7.766188548797e-05	0.0846016923200998
155463	chr1	201951607	42.1486916621373	0.000575399253556961	0.135788288179747
155730	chr1	202099940	52.9271417368008	0.000594779156621944	0.136355063312408
155758	chr1	202113088	61.4717465877947	0.00050003150720946	0.13081355332469
156492	chr1	202777231	51.3341469410775	0.00040456965919977	0.122784973324546
157101	chr1	203242814	72.3834557881658	1.96317526609432e-05	0.0617946411737972
157471	chr1	203598540	53.4842006854671	0.000765778958788725	0.145943849909452
157473	chr1	203598644	62.3904016791241	9.10796459294313e-05	0.085848055431924
157503	chr1	203619473	45.0639683438639	0.000327294991179532	0.117996721578871
157746	chr1	203831261	46.3364742931576	0.000800418736972573	0.147476198725169
158056	chr1	204098406	53.6163675882606	0.000375266837069672	0.121212018213489
158160	chr1	204164176	62.9368357544055	8.6908604469058e-05	0.0852077917927668
158399	chr1	204347151	49.5725679047499	9.48618741206019e-05	0.086416375677257
158798	chr1	204654521	74.8818886847315	0.000580100639818365	0.136017830523042
158930	chr1	204797774	47.8473243489201	0.000212628013298958	0.105233482060478
158934	chr1	204800880	53.6573608014692	0.000148305879159085	0.0956929108200402
159199	chr1	205030981	61.6278456178393	0.000307797381985163	0.116665080626384
159587	chr1	205312972	41.8132380669348	0.000744202074927561	0.145114889203971
159999	chr1	205599039	37.0344127339532	0.00015376627643295	0.0975072705517431
160427	chr1	206137548	37.8450188775632	0.000184449467780977	0.102319319090026
160431	chr1	206137711	47.5097625588825	7.43801458522365e-07	0.0379997070096205
160504	chr1	206223629	56.9309715919982	0.000355210103396611	0.120955849601852
160761	chr1	206644802	59.3388375198447	3.41618591116792e-05	0.071080479133155
160818	chr1	206680281	58.3394972925627	6.97593608021198e-05	0.083352830616528
160894	chr1	206730255	57.100852306887	0.000241778249594409	0.10916620558885
160900	chr1	206730646	55.9525377429899	0.000656091958245139	0.140432140099223
160905	chr1	206730856	42.2618278264515	0.000743157919662766	0.145082221734919
161238	chr1	207083019	59.5751366710205	0.000780280336586783	0.146458929582247
161564	chr1	207628071	49.2191122578171	0.000124856569576524	0.0908074132244458
161659	chr1	207818549	57.9853333502101	8.78941729141206e-06	0.0597862668019886
161894	chr1	208115910	68.2402543943728	8.12365256827274e-05	0.0847295398488201
161918	chr1	208133088	57.0324358579959	0.000102670105594304	0.0866770505266311
161932	chr1	208136960	56.897449584178	0.000491995386248428	0.130004399347537
162056	chr1	208256528	53.5197247452574	0.000301017405469396	0.116001720739365
162214	chr1	208393291	46.7381273013043	0.000802920750836745	0.147476198725169
163359	chr1	210424713	46.954951531598	0.000230347090656346	0.107202927847894
163882	chr1	211307309	46.421499553242	0.000718865452893736	0.143841660098461
163988	chr1	211432028	62.3743962055141	0.000920365400835846	0.153153242327388
163989	chr1	211432143	51.5145097807332	0.000431865522136	0.125344496099717
164000	chr1	211432736	49.4540676293509	0.000472192739440236	0.127844211883517
164052	chr1	211500124	60.7958865860154	0.000504471962463807	0.131046695702542
164063	chr1	211500461	46.615600427716	0.00034347216540065	0.119768030160775
164318	chr1	211752305	83.4042599445207	4.42628105634798e-06	0.0538194298567361
164862	chr1	212399136	47.7593765487892	0.000463157932390107	0.127100065815048
165313	chr1	212781307	39.6190780904341	0.000742768384579122	0.145082221734919
165797	chr1	213189049	62.624353795311	4.89088939868031e-05	0.075616818322804
167015	chr1	215255434	71.0798065824286	6.11894995921355e-05	0.0811255427447742
167021	chr1	215256155	47.1867988238295	0.00072553977659256	0.144105462400267
167522	chr1	216774124	49.5526467100757	0.00011246069054111	0.0877973749440444
167525	chr1	216774417	58.2906076994358	4.7584112100105e-05	0.075616818322804
167701	chr1	217263038	55.6205851482222	0.000485045480020904	0.129299388869231
167704	chr1	217263135	46.6368268367923	0.000878886841376284	0.151358112610461
168188	chr1	218330138	38.8450477330069	0.000737013161092967	0.144773215240365
168205	chr1	218338525	48.6465145921133	0.000810926456804373	0.147801798288341
168261	chr1	218458622	49.7150209695368	0.000812545539356274	0.147831247061051
168305	chr1	218520944	55.1234128559865	0.000920573810398412	0.153153242327388
168944	chr1	220101291	50.0814414407018	0.000480739085381815	0.128916291956175
169091	chr1	220267554	50.5457566792618	0.000787050111694813	0.146845652257719
169364	chr1	220701482	46.0996244476165	0.000309307883501976	0.116665080626384
169379	chr1	220702175	44.070911280324	0.000959722661376844	0.154708836293724
169380	chr1	220702226	41.2504619340832	0.000361393027024072	0.121202487465264
169615	chr1	221052515	48.3309433366146	0.000942542488167566	0.154038257235041
169626	chr1	221053212	61.9374856906872	0.000537399441044507	0.133102257774279
170284	chr1	222638645	55.5387193197143	0.000187438773855545	0.102849582973757
170287	chr1	222638883	58.3804348122893	1.14410138659576e-05	0.0617946411737972
170534	chr1	222885885	52.0800447162348	0.000376003463638853	0.121212018213489
171194	chr1	223738471	58.0234963669986	0.000779292529504472	0.146382704302399
171351	chr1	223900110	65.4581973569887	6.61886378014999e-05	0.0814928312495599
171418	chr1	223936834	45.492203850386	0.000945811516056003	0.154181290780236
171820	chr1	224370991	55.6824224823448	0.000184173881097349	0.102319319090026
172277	chr1	224803997	45.8253806431612	0.000544856978736679	0.133896296814668
172285	chr1	224804339	49.9419967076342	0.000495623743522362	0.130324530937332
172694	chr1	225614418	53.5010252277604	0.000129245198386867	0.0918911778039376
172742	chr1	225638278	60.6612493573262	4.46913351937754e-05	0.0754379422657156
172753	chr1	225648115	55.8974270894757	0.000453085111742723	0.12654383888015
173279	chr1	226070604	76.4819306929372	0.000125861843304888	0.0911818179795928
173367	chr1	226112029	51.3761420742061	4.34122642375833e-05	0.074262065582651
173582	chr1	226250120	55.9728036339189	0.000309847504812891	0.116665080626384
173589	chr1	226250817	47.1313618303569	0.000645334311163779	0.140043936748683
173854	chr1	226374225	76.5971615778248	3.58510243089345e-05	0.071080479133155
173922	chr1	226411555	64.8721740461681	0.000273475993383488	0.11187988526681
174142	chr1	226595410	50.9903117249798	0.00057245289021133	0.135699471496426
174147	chr1	226595767	56.5312453161094	8.75077528606298e-05	0.0852099737442887
174164	chr1	226612874	63.7615429340431	0.000437306069937114	0.125467836373939
174452	chr1	226841317	51.160535419064	0.000888346721881091	0.151591428367182
174483	chr1	226864266	70.1455614287465	0.000169730800611178	0.100105502372029
174511	chr1	226891044	53.8016709666106	0.000139858108048477	0.0933860339547087
174532	chr1	226905450	67.0873094291459	0.000514444038718335	0.131518217496285
174757	chr1	227058716	48.3468844215788	0.000335914652465075	0.119174877026336
174759	chr1	227058837	58.6228351458092	0.000554830449679552	0.134292627831688
174777	chr1	227070534	55.5462873562333	0.000635362304929353	0.139626560829374
175120	chr1	227506052	47.0380019080846	0.000681516019110514	0.141804432799575
175315	chr1	227730144	76.2931767086185	2.55191496127147e-06	0.0459454476780762
175508	chr1	227915896	67.7709335192755	0.000618675585472191	0.138384604950763
176000	chr1	228191682	69.7228374193843	5.4623346506686e-05	0.078846764056671
176002	chr1	228192005	46.2797905187517	0.000928128919214281	0.153555400638036
176029	chr1	228195492	43.2327169276883	0.000739882041580779	0.144898521809919
176235	chr1	228291172	50.6286650794302	2.81008119170331e-05	0.0682528042951949
176568	chr1	228457345	57.185427317664	0.000584502384023799	0.136228083374549
176889	chr1	228566569	46.6124668601599	0.000749087794905268	0.145225885489376
176963	chr1	228603992	41.1915358937549	0.00093550336515233	0.154007508455392
177005	chr1	228633392	53.6984329015235	0.000159338928628519	0.0985982760069316
177034	chr1	228645513	56.964908113226	0.000445172504534464	0.126201473533874
177037	chr1	228646336	53.8375500486101	1.39651897267835e-05	0.0617946411737972
177103	chr1	228675080	42.6250705994752	0.000439346152126679	0.125616854265941
177115	chr1	228675692	59.5788279895263	0.000592436128258627	0.136277248355579
177756	chr1	228783750	51.1441366699611	0.000121794968221761	0.0899508929714081
177760	chr1	228784089	52.8115178435247	0.000139381753941115	0.0933860339547087
178177	chr1	229292648	26.7421198636791	0.000853281317576297	0.150120838582892
178364	chr1	229478272	55.0801781221438	0.000826751027871979	0.148710979323903
178457	chr1	229544295	59.0242373388712	0.000613722095251852	0.137892212824576
178644	chr1	229693944	75.5425811712951	0.000217339892937921	0.105651518034031
178741	chr1	229762242	45.2839589015719	0.000862728823933652	0.150541645751507
179045	chr1	230202692	46.4112068754597	0.000731808123860821	0.144435199674346
179049	chr1	230202951	61.1811329726062	0.000519920936578025	0.132066164944418
179502	chr1	230561348	59.0299201352199	1.41683745284824e-05	0.0617946411737972
179514	chr1	230561846	55.0538957020298	0.00019038845188433	0.103331740718163
179523	chr1	230562282	68.0817895153366	3.54172243523952e-05	0.071080479133155
179524	chr1	230562310	45.0105141093503	0.000637106097692456	0.139654803553154
180043	chr1	231176111	68.1538769403442	0.000313706630222964	0.116958402503846
180165	chr1	231298262	46.4576641396361	0.000802077439478144	0.147476198725169
180465	chr1	231557069	51.5624015125666	1.45929420634638e-05	0.0617946411737972
180488	chr1	231558070	54.0468534107953	0.00022241982171902	0.106475344597439
180632	chr1	231762653	54.7184821304299	0.000936445377511379	0.154007508455392
181361	chr1	232765807	42.9385389682549	0.000588108666359097	0.136274236833376
181367	chr1	232766099	52.8887394754798	0.0001350394595121	0.0933860339547087
181882	chr1	233463509	52.2944403256705	0.000713597122763231	0.143702725667705
181889	chr1	233464080	45.6114333924844	0.000454773983670038	0.126710508105313
182424	chr1	234367058	60.6588311327487	0.000614926027262624	0.13791643514183
182815	chr1	234745792	46.595381757103	6.18550015291115e-05	0.0811255427447742
183675	chr1	235530935	48.02070437145	0.000375227693812569	0.121212018213489
183846	chr1	235668457	59.8106890173409	0.000242676585278122	0.109276059380956
184295	chr1	236150896	28.7843002711373	0.000279355918835666	0.112813959877606
184398	chr1	236228407	42.05368727872	0.000983958085006296	0.155299661513043
184498	chr1	236304770	58.4892356044567	8.89180581647523e-05	0.0854033060666344
184506	chr1	236305460	61.2227838247169	5.66342138216581e-05	0.0793226784315366
184523	chr1	236306902	46.1490237983185	0.000623730313077794	0.138909944092326
184798	chr1	236558382	54.6478177671757	0.000904920875371573	0.15258940598106
184967	chr1	236687291	47.6146781482362	0.000303675560933066	0.116271168694715
185237	chr1	236958889	42.0154722350257	0.000329875492492929	0.118341926928686
185394	chr1	237205303	50.2364881627088	0.000624395551961556	0.138919714943507
185397	chr1	237205465	38.7431471363591	0.000772217539310571	0.146177169272886
186568	chr1	239550126	40.9560546408928	0.00057144135080396	0.135659996982322
186900	chr1	240160969	58.5528876748175	0.000229777158335577	0.107132340636695
187918	chr1	241519612	50.2500046711597	0.000497795938042701	0.130531985169334
187921	chr1	241519719	49.7773525066749	0.000411804600281294	0.123744580905755
188122	chr1	241840606	63.2151766388109	3.53558663332152e-05	0.071080479133155
188414	chr1	242162104	54.5684164507747	0.000894744932985808	0.15206454007292
188940	chr1	243053671	35.6116959132872	0.000856778152297282	0.150284066495629
189572	chr1	244014334	53.8238098280539	0.00021655231839339	0.105651518034031
189735	chr1	244212507	52.3855901059359	0.000553416598067669	0.134165493190695
189969	chr1	244426750	49.9892274479584	0.000288476749530643	0.11408069198529
190377	chr1	244894337	59.5596572892409	0.000729403317304071	0.144190327351098
190582	chr1	245026822	58.932516541039	0.000195499825600558	0.103768593331674
190586	chr1	245027007	34.7521136440231	0.000837646707925382	0.149090517836639
191023	chr1	245331611	57.906019376895	0.000190813239028773	0.103368105895186
191389	chr1	245651829	38.94354362432	0.000921952292972835	0.153164005634901
192400	chr1	246740654	69.709389732248	0.000155012922192576	0.0976828550615721
192561	chr1	246862639	62.9075413552879	0.000549837120700234	0.134165493190695
193366	chr1	247494912	51.5295925898628	0.00071644113872601	0.143702725667705
194354	chr1	249168281	46.5313759008504	0.000507732874746999	0.131046695702542
194376	chr1	249200957	46.2303300537683	0.000960716972206705	0.154708836293724
194426	chr2	11476	46.3965466989587	0.000919056472500163	0.153153242327388
196277	chr2	1519974	44.452318620909	0.000978640957207267	0.155146240332936
202818	chr2	9143512	48.8513882835007	0.000328722644147255	0.118246098499841
204296	chr2	10220406	47.1179001701639	0.00063308790744977	0.139398578935027
206144	chr2	11269781	46.2669135105527	0.000370874424367287	0.121212018213489
207795	chr2	13319404	32.7018996807774	0.000386495971018271	0.121569019978422
209197	chr2	16082952	37.3951959517806	0.000952408034201255	0.154393008402417
209919	chr2	17284780	29.8972688835756	0.000885592915734826	0.151560450043428
211617	chr2	20548413	65.4806167295007	8.72789293070367e-06	0.0597862668019886
215886	chr2	25565374	79.480546019681	7.04423396752086e-05	0.083352830616528
216227	chr2	25896013	57.9864922724788	0.000677418469510055	0.141565020564326
217676	chr2	26916325	51.8136840654	0.000557101599271537	0.134500271057803
218105	chr2	27193543	49.7099730444726	0.000781314539453154	0.146543743250661
218583	chr2	27440717	47.9623750969636	0.000360007213658838	0.121202487465264
220255	chr2	28940347	48.8580806132757	0.000750743227143986	0.145243192916979
221145	chr2	30114238	54.1531495381183	0.000528079517654499	0.132095294348055
223856	chr2	33547884	57.8358544516521	0.000757490798970784	0.145450628098595
229944	chr2	43227830	40.5038896239929	0.000460356500504549	0.127023901053509
231686	chr2	45164724	54.6320278015898	0.000419178943044047	0.124399322774832
232318	chr2	45877258	54.9987753699636	0.000714918196733528	0.143702725667705
239807	chr2	60251862	41.5233788878671	0.000434589668554348	0.125344496099717
240252	chr2	60809019	60.6535191558994	0.000644497610630878	0.139974460785725
242616	chr2	63849932	49.978390555418	0.000580815478622115	0.136017830523042
243252	chr2	64750858	59.4446900318094	0.000813968040005186	0.147831247061051
243477	chr2	64978540	65.1223400913432	3.31574259872539e-05	0.071080479133155
243571	chr2	65092138	62.3634991829151	0.000655799241071574	0.140409295763303
246948	chr2	70314073	74.1318352920807	2.07146855344709e-05	0.0617946411737972
247705	chr2	71017469	57.2588345911068	0.000228415935102546	0.10690428585269
248831	chr2	71974130	53.5310449008216	0.000861093919728411	0.150513196090412
251288	chr2	74664088	46.0114480388196	0.000757013215059785	0.145450628098595
255521	chr2	85082986	45.2103866742227	0.000615147134113322	0.137925049332731
255905	chr2	85360004	48.6960012399786	0.00055013168463367	0.134165493190695
255926	chr2	85361264	46.5444549857627	0.000296505850731898	0.115342659911301
256558	chr2	85765645	54.9991553421603	0.000329682318939706	0.118341926928686
256934	chr2	85981954	46.3352415759389	0.000823088983773015	0.148544239370063
257953	chr2	87015912	47.756474406344	0.000638115469309014	0.139703674283474
261910	chr2	96012698	47.2437888047507	0.00026820739464792	0.111143836307383
263647	chr2	97482221	48.8995120567888	0.000235535849531533	0.107896428654545
265392	chr2	99225824	50.5486123824741	0.000940353697848914	0.154038257235041
265610	chr2	99467599	33.2410339681603	0.000962658981751821	0.154856404805643
265701	chr2	99552518	52.3361155276704	0.000651140540293362	0.140139134349982
270053	chr2	105489650	53.5941790452103	0.000158564904631821	0.0985004896239495
270506	chr2	106015654	56.8661739336412	0.000937211963716903	0.154038257235041
273304	chr2	109833969	44.9867454472726	0.00030975080238121	0.116665080626384
273306	chr2	109834129	52.6958336294977	0.000949415108220386	0.154279762111942
277263	chr2	114035597	57.9601784692866	0.000921144371269902	0.153164005634901
280894	chr2	120333154	31.4217721758418	0.00073255369302921	0.144506791751302
286125	chr2	127864354	45.3542363544867	0.000385999925344528	0.121569019978422
287790	chr2	129037559	60.7656607223936	0.000934359919508818	0.154007508455392
287793	chr2	129037744	49.3568441898773	0.000938882426601984	0.154038257235041
290820	chr2	131630050	41.0144410311817	0.00068418546441599	0.142186389170127
291088	chr2	131837317	38.8858528365199	0.000802953709757436	0.147476198725169
294914	chr2	137505399	51.9362161417413	0.000341142240104807	0.119432305973816
297501	chr2	145090047	61.2174254061699	0.000153366900404424	0.0973771467529119
309088	chr2	171573620	48.7712306047037	0.000832979682657181	0.148940016675165
317680	chr2	187713712	55.9617808583822	0.000398326676801655	0.122627290829149
323673	chr2	201171841	40.8319924070172	0.000667310239377953	0.141073420981192
323928	chr2	201560150	60.820149945476	0.000346218363809434	0.120059765147344
324937	chr2	202803791	36.3507410774147	0.000729580937841238	0.144190327351098
329643	chr2	208890080	71.213566870084	0.000135701867137684	0.0933860339547087
331599	chr2	213902256	-42.7184180689503	0.000612524721404449	0.137757009676713
332751	chr2	216483919	64.1082028793317	0.000981701909884826	0.155281664981213
335848	chr2	219822382	39.6199844962068	0.000115535715956887	0.088974314780529
335866	chr2	219825707	43.9495019220872	0.000591168132097403	0.136277248355579
336276	chr2	220041023	51.4658277614947	0.000207200673711748	0.104836843948449
338317	chr2	222435668	64.0267791735532	0.000975837667656164	0.155112944044541
341941	chr2	228524122	29.5697254766194	0.000400506002084511	0.122627290829149
344216	chr2	231915548	41.8288189189325	0.000490590342506264	0.129814881829161
345167	chr2	232507828	67.7506204975176	4.86010354959685e-06	0.0538194298567361
345382	chr2	232574654	53.6177946155908	0.000618846525462295	0.138384604950763
350035	chr2	236579789	58.5568495803514	0.000457052147855971	0.126868977576276
350611	chr2	237011485	57.9535217943386	0.000310426137836572	0.116666666525212
350759	chr2	237072476	59.6929291029402	0.000401960808384291	0.122635289346108
352162	chr2	238384277	46.2104898016008	0.000725477856907426	0.144105462400267
353322	chr2	239066823	52.8115632761132	0.000467558956334955	0.127565865726384
355391	chr2	240245430	28.9911005755553	0.00018922144012108	0.103053297478098
357750	chr2	241512564	44.0490090668988	0.000214559546220275	0.105454201033606
359841	chr2	242448118	60.6608399982912	0.000923888021194216	0.153290485214983
360821	chr2	242760115	37.840306413109	0.000942983112689996	0.154038257235041
360960	chr2	242802217	47.0483181169171	0.000723116286162336	0.143992126915431
361535	chr2	243031562	-44.3987382165094	6.62796975978332e-05	0.0814928312495599
362147	chr3	1416819	-27.3803856476297	0.00036422231465356	0.121212018213489
364820	chr3	6899857	27.9116628802213	0.000583516735202315	0.136228083374549
366632	chr3	9745473	46.8597208369447	0.000815299988550166	0.147920027795281
368421	chr3	11036747	47.5531508544494	0.000174970441037519	0.100464125899763
371175	chr3	13269809	58.4019781276293	0.000203782670630956	0.104654323348366
373144	chr3	14693548	79.7657530316577	1.46211030671189e-05	0.0617946411737972
375471	chr3	18484912	46.6012576639664	0.000303756638178246	0.116271168694715
378130	chr3	24870760	55.8553220449979	0.000205973165690512	0.104836843948449
379825	chr3	28619704	63.5765253472257	0.000667659564018091	0.141107755409782
383520	chr3	35734234	39.835799981489	0.0007147308632965	0.143702725667705
384785	chr3	38026072	31.7650212545299	0.000912828171593646	0.152835797772969
385755	chr3	39093487	38.3131499798829	0.000986253819710293	0.155316922811757
388087	chr3	42700950	49.757406906573	0.000257203123795029	0.110147360576076
391718	chr3	46940342	62.2895872498581	0.000147187585300258	0.0954193155128502
394475	chr3	48699172	56.9816935585433	0.000544308739893215	0.13384871052649
395339	chr3	49170587	48.6199252349437	0.000775898942478021	0.146327795289502
397708	chr3	50388355	72.3044142927691	0.000689539171017161	0.142556984638696
397740	chr3	50402392	55.2965876841079	5.13751156542474e-05	0.0762481887421488
401926	chr3	53879694	59.1091813387561	0.000212716517965602	0.105233482060478
403868	chr3	57050966	59.1017247769229	0.000529307868882387	0.132353508411956
405038	chr3	58174875	44.7568038760928	0.000138915657271658	0.0933860339547087
407354	chr3	62305118	56.5200740371752	0.000808043339602141	0.147668110968091
411196	chr3	69721101	-33.967468132007	0.00088542912995398	0.151560450043428
413029	chr3	72643323	56.8657030956116	0.000776748375037209	0.146329184421026
414953	chr3	75721608	36.9810681703941	0.000541945437736226	0.133441425719389
421537	chr3	98311811	79.8408137582091	4.77407249718169e-05	0.075616818322804
421637	chr3	98451854	72.6702783811607	9.25363564447406e-05	0.0859766026008501
426718	chr3	110789980	59.8247188063198	9.6151241626865e-05	0.086416375677257
431654	chr3	121468209	43.1702393932693	0.000986289341956816	0.155316922811757
433466	chr3	123699294	52.5847931360616	0.000707749064224418	0.143562358731016
436006	chr3	126257435	52.6808219266858	0.000721052111085475	0.143865572076458
436914	chr3	127007376	49.8091795282063	0.000570196056970598	0.135449553016007
439950	chr3	129068210	58.2808080995119	0.000221176048649197	0.106284312910749
440205	chr3	129249424	41.8556377719211	0.000663508286890844	0.140821752749731
442951	chr3	133614398	68.9464186254104	0.000219139837159959	0.10588407572227
443295	chr3	134032205	49.9505035451655	0.000422293045273833	0.124574963829081
443645	chr3	134471584	32.6430230102924	0.000494612587675693	0.130194691571338
450719	chr3	147087460	58.5341425050048	0.000796147219688594	0.147312798212434
452820	chr3	150803585	63.7229314771437	0.000781695169032793	0.146578717251141
452946	chr3	151024463	35.5864672957663	0.000572943901413685	0.135699471496426
453036	chr3	151194310	50.6425265027888	0.000206800603497683	0.104836843948449
467937	chr3	182884940	61.6752850375592	0.000813119640180394	0.147831247061051
467985	chr3	182925250	57.9580062053792	0.000350748842310562	0.120414358469465
471030	chr3	185216576	59.4812878070779	0.000484080911962509	0.129179104612502
472086	chr3	186209337	30.2611968091995	0.00013260352592461	0.0926054694077627
472696	chr3	186710220	57.9277861782241	0.000879834478891971	0.151358112610461
473181	chr3	187455713	65.867081016175	0.000188446469764782	0.103053297478098
477419	chr3	194406442	59.1421833149115	0.000247371490708191	0.110041689806295
477429	chr3	194406844	66.5270411096846	0.000831333269786814	0.148853503340331
478845	chr3	195454662	46.0889164561407	0.000473069981197254	0.127959582219715
484926	chr4	924243	50.7842119800432	0.000413300270599008	0.123765643230297
485190	chr4	981248	49.2865635775232	0.00085553857959628	0.150229467776722
485570	chr4	1043541	51.7722672090157	0.000197335463085197	0.103768593331674
489815	chr4	2470914	76.1532666298689	2.10377591756526e-05	0.062282574793077
491463	chr4	3370763	48.6520208502012	0.000169333672046641	0.100073203263305
497082	chr4	7044397	64.7502767255681	0.000807746352418568	0.147649579074504
499789	chr4	8272185	47.1614241378003	0.000880376347947512	0.151358112610461
500940	chr4	8789996	33.0702442824014	0.0003909031156303	0.121955664276232
504295	chr4	13536328	70.7364925059888	5.62113555521221e-05	0.0790236403320653
507736	chr4	20845075	43.0470636157485	0.000181375240394008	0.101916110767443
518680	chr4	41757434	53.2228640023596	0.000278531376009302	0.11280408783119
520890	chr4	47617697	27.0314014681597	0.000795370970777489	0.147260014466641
521052	chr4	47916721	45.6993913936376	7.5270570455704e-05	0.0836879043073565
526909	chr4	61804163	26.0831193077742	0.000727578446368561	0.144190327351098
529378	chr4	69385173	27.8721027517261	0.000455237861101696	0.126710508105313
535104	chr4	81952408	40.6716999182684	0.000284487932453605	0.113769445150748
543662	chr4	101111865	51.2678525691598	0.000569469536452371	0.135393514961026
544631	chr4	103740983	48.1419586239817	0.000842751549439356	0.149382312742381
545691	chr4	106816495	50.3281009155583	0.000346110660656099	0.120059765147344
546276	chr4	108641756	59.8304634536187	0.000685324344451896	0.142224489632416
547478	chr4	110624433	73.3855763918068	5.85256207037567e-05	0.0809208889441534
547550	chr4	110737018	63.840820370848	0.000122710535894515	0.0902900419885164
547729	chr4	111117490	51.8508030809831	5.69631182839679e-05	0.0794883989819485
553069	chr4	123844473	57.7306856779837	5.56465437202358e-05	0.0790060188212629
555131	chr4	128982329	66.9520280387236	0.000918744896690072	0.153153242327388
559742	chr4	140223253	58.8191063542806	0.000329001974473433	0.118251274931577
562383	chr4	146019165	59.5453352580137	0.000208094767457261	0.104836843948449
563511	chr4	148402210	57.6804180754163	0.000904590349086282	0.15258940598106
567133	chr4	154711172	46.5031706179008	0.000893743965988841	0.152016341511764
573919	chr4	170642044	38.7803607327571	4.79579781462909e-05	0.075616818322804
575230	chr4	173870147	60.4159589336685	0.000154959364177283	0.0976828550615721
575687	chr4	174450937	66.8835784220185	0.000501449149532825	0.130872992985053
580292	chr4	184020541	37.7084621859539	0.000419993321672165	0.124437197144148
581220	chr4	184727677	51.4691224763125	0.000918252532826824	0.153153242327388
588878	chr5	476070	-44.3293155295658	0.000957168094956535	0.154702316147096
589127	chr5	523710	58.3876101496052	0.000901336590838406	0.152417415339866
589429	chr5	612847	53.4307088239733	0.000345944313807901	0.120059765147344
591625	chr5	1315726	55.9308685356921	0.000512987011065334	0.131518217496285
593038	chr5	1857411	68.0736052639665	0.000319878201783739	0.11762589905056
593950	chr5	2334910	66.6858146279463	1.5610768511469e-05	0.0617946411737972
594506	chr5	2750164	61.9353833163498	1.86537203048799e-05	0.0617946411737972
595297	chr5	3388378	54.4276043074051	0.000287453761557417	0.114003891681653
598324	chr5	7395648	65.2787359683157	0.000526524751453917	0.132066164944418
611905	chr5	34750865	36.0300015420482	0.000911138393831808	0.152835797772969
615173	chr5	40681973	50.3465704437365	0.000738487657086974	0.144893406206324
616110	chr5	42950996	61.1164858066084	0.000278393519513823	0.11280408783119
616466	chr5	43120881	42.6343361902894	0.000437598685406458	0.125467836373939
629918	chr5	72528973	49.0375791655144	0.000485771663544318	0.129355939234983
638533	chr5	87980943	74.8629141837846	0.000307988313860353	0.116665080626384
638813	chr5	88750435	-49.9076329655023	4.38727264476652e-05	0.074262065582651
660307	chr5	134880156	54.3381771285026	0.000374431496487598	0.121212018213489
663192	chr5	138587114	-49.3594404304725	0.00072136637587977	0.143878953635216
663408	chr5	138728960	55.2704955737437	8.12179098632056e-05	0.0847295398488201
663832	chr5	139028475	66.5156718064446	0.000564898655818069	0.135126586544801
663904	chr5	139049735	49.6049449549421	0.000671390187558089	0.141168445733588
665221	chr5	140221713	65.7442638434008	0.000297495088108856	0.115410207790908
666346	chr5	141062755	-65.940523866284	0.000437093634070498	0.125467836373939
667604	chr5	142093011	53.06428449933	0.000434639462519342	0.125344496099717
670576	chr5	148651840	49.2984316957212	0.000667270173343964	0.141073420981192
671434	chr5	149340748	53.2888717076325	4.96511272266303e-05	0.075616818322804
672788	chr5	150460322	71.425927660566	0.000523613496818478	0.132066164944418
674660	chr5	153857675	54.3185263622543	0.000537646973595434	0.133102257774279
674686	chr5	153863361	60.1815854491566	0.000168100693139946	0.100073203263305
680860	chr5	165907496	34.9134060834249	0.000322217792356163	0.117828996362677
681760	chr5	167605006	-36.8473771772388	0.000814614829400265	0.147831247061051
683283	chr5	169763535	46.5861775678617	0.000198962984082811	0.103927453268321
684068	chr5	170769709	64.0921656079775	0.000504469691503764	0.131046695702542
692321	chr5	176923520	46.9513026594782	0.000211468367176894	0.105096684813757
693620	chr5	177676408	58.865449984574	0.000397120977977254	0.122617152157606
694815	chr5	178323258	41.0045346335836	0.000786100690644862	0.146845652257719
695577	chr5	178715127	54.0477292228081	0.000834181232753753	0.14898255789544
698200	chr5	179920625	45.9392496987104	5.08966157275242e-06	0.0538194298567361
698814	chr5	180239161	31.3587829103751	0.000348981207364402	0.120403564024019
699305	chr5	180617065	57.2773405506162	0.000108638893377632	0.0874525828486662
699354	chr5	180631741	53.8595129637713	0.0003801633957415	0.121497872267407
700153	chr6	430063	58.961773495226	0.000548095021924872	0.134096743758177
703861	chr6	3744185	49.7442823954503	0.000601154125504489	0.136778145003384
712339	chr6	14211889	62.8482861529781	0.000434677991484067	0.125344496099717
713366	chr6	15265975	49.4063945744151	0.00079853907124103	0.147476198725169
716868	chr6	20024942	43.8617541640021	0.000633404701336952	0.139398578935027
721430	chr6	26660145	73.6966695045656	0.000143445630402677	0.0946988770124681
723313	chr6	28446918	-56.5401824671619	0.000990567123032811	0.155372912686117
723506	chr6	28611284	57.5263987846635	3.74470477803008e-05	0.071080479133155
723678	chr6	28740512	47.7908840872622	0.000739061255209067	0.144893406206324
724805	chr6	29910986	72.5622709752242	0.000206218583071344	0.104836843948449
724945	chr6	30071345	53.4243685634557	0.000978019996068535	0.155112944044541
725018	chr6	30137057	41.006025264809	0.00087627870943691	0.151276003291543
727509	chr6	31762803	56.5450310881382	0.000575631653614279	0.135800681217088
731605	chr6	34216841	54.561653697203	0.000785104766431656	0.146845652257719
733649	chr6	35704150	62.4706526113658	0.000104262486871383	0.0868774652056293
737376	chr6	39197290	62.5316886796076	0.00088321645569371	0.15151805976383
738964	chr6	41473496	56.3099915835077	0.000228644430223029	0.10690428585269
739137	chr6	41566690	53.757717468477	0.000194161458473738	0.103589048768224
739149	chr6	41570842	64.4894413168617	0.000607294947854755	0.137314200476293
739669	chr6	41863789	48.1207660355559	0.00024546359930697	0.10964975176829
740771	chr6	42713388	51.2406140254865	0.000443990771892734	0.126201473533874
744683	chr6	46702902	52.4967987693984	0.000358292338938051	0.121025037580463
745182	chr6	47680677	36.3845328683384	0.000541628843938377	0.133406983616066
753039	chr6	71377395	61.3582257148723	7.61640386293036e-06	0.0587592288770283
753801	chr6	73331582	52.7076450785819	0.000462618963580716	0.127093145625274
755283	chr6	75881291	33.6749116894973	0.00059875937185674	0.136556234452376
758251	chr6	83902643	49.255186679716	0.000351724378583267	0.120517726377119
762237	chr6	91145466	33.9819439856055	0.000322925164992877	0.117828996362677
764634	chr6	99279435	56.5582755590188	0.000875141909863944	0.151200521112425
764638	chr6	99279700	47.1833359597524	0.000477124224039857	0.12872766202327
765912	chr6	101850541	51.0281030295323	0.000203440544248956	0.104654323348366
769535	chr6	108486175	51.3670336153673	0.000318232869004525	0.117363877884932
770729	chr6	109901936	29.5812346208069	0.000285435517775421	0.113814939083394
770772	chr6	110012489	57.8595658575067	0.000970533570074927	0.155095986628562
772317	chr6	112175398	36.9167296762105	0.000390920444233733	0.121955664276232
779101	chr6	128841587	56.9825394051205	0.000444784861481409	0.126201473533874
781611	chr6	134216921	63.1011011911871	0.000273575026330263	0.11187988526681
783841	chr6	137816967	48.3372885169963	0.000605519763986857	0.137111564185032
787121	chr6	143999355	53.5890163101564	0.000954384561278733	0.154546222915211
792145	chr6	151560928	67.0345135804924	4.22493375458679e-05	0.074262065582651
793467	chr6	153451036	63.3951903444786	0.000432630222490558	0.125344496099717
796432	chr6	157802288	59.2149503066483	0.000877452644253966	0.151358112610461
796945	chr6	158243663	68.0462624817588	0.000833313627281211	0.148940016675165
798208	chr6	159125159	39.7697057071836	0.000996891759624275	0.155815064180374
799241	chr6	160182445	79.8119563288988	0.000140030003320476	0.0933860339547087
800148	chr6	161354738	-33.4685738669496	0.000943054590822112	0.154038257235041
803381	chr6	166078961	66.7506299112844	0.000508975370599911	0.131046695702542
806979	chr6	168678443	46.1852185042674	0.000761664148187811	0.14571980523298
810172	chr6	170747595	48.5829226382011	0.000632502996407325	0.139374232218558
810695	chr7	162282	48.934205382242	0.000952415836851387	0.154393008402417
812268	chr7	566357	36.8069252435637	0.000133886954687113	0.0932034039129106
812721	chr7	675591	36.7069117149394	0.000198907262668336	0.103927453268321
815897	chr7	1443375	56.8763636790709	7.46630422200915e-05	0.0836282568638812
816014	chr7	1471499	-45.6071723484313	0.000748084417910427	0.145114889203971
816191	chr7	1500632	53.8246754434352	0.000532810878322263	0.132750973327625
816194	chr7	1501262	48.584221121641	0.000675503637777119	0.141458706455123
817681	chr7	1882979	-45.4321916296794	0.000376517379062574	0.121213066734792
817693	chr7	1885780	29.1922825938783	0.000747798537724215	0.145114889203971
819657	chr7	2518642	31.8583816395031	0.000103935334345559	0.0868156072972658
820584	chr7	2773099	55.2926332040852	0.000522328389468293	0.132066164944418
828397	chr7	6970387	72.6054660027418	0.000120050658897921	0.0895370812106827
833848	chr7	20816345	47.8457231883563	0.000235086453234574	0.107821416298196
838161	chr7	26897666	70.760630663499	0.000124529413618484	0.0907443192590884
838517	chr7	27183699	64.9032198885411	0.000491357864662629	0.12992689461563
838806	chr7	27243256	56.6965873184944	0.00043706043183907	0.125467836373939
838847	chr7	27265455	49.9489728370988	0.00032241156475313	0.117828996362677
839552	chr7	28219400	57.0579644044218	0.000162201923574299	0.0995152628325384
840960	chr7	30174399	64.785382056132	0.000942710280322921	0.154038257235041
844706	chr7	36193350	41.9329456435415	0.000905916081211814	0.15258940598106
848948	chr7	43622607	40.1715086751388	0.000985616447527697	0.155316922811757
859036	chr7	56605896	55.7300258348353	0.000270607855593458	0.11148765838081
859121	chr7	56732040	46.0099533151742	4.32485749993147e-05	0.074262065582651
860730	chr7	62508365	44.5378162437019	0.000971590255115536	0.155095986628562
862377	chr7	64029931	46.8223726593655	0.000434278759225761	0.125344496099717
864926	chr7	66147654	67.0223513236229	0.000887993467923303	0.151566727934034
867201	chr7	68697560	60.3485257856824	2.64872396118032e-05	0.0678698946943271
876152	chr7	75269464	43.8809065058013	0.000704818294056504	0.143381616693713
876227	chr7	75317824	57.0328375973504	0.000139363708101157	0.0933860339547087
883477	chr7	90225616	44.7995016009719	0.000545791396579767	0.13390797686427
885834	chr7	95696475	48.6064067425889	0.00044816924000368	0.126339377343248
890043	chr7	99698454	63.7698061738442	0.000181440757991714	0.101916110767443
891496	chr7	100290846	45.4665138154252	0.000654212947603762	0.140398035350645
898433	chr7	105752225	62.7066243895968	0.00091109331398692	0.152835797772969
901189	chr7	112090282	42.8441189418477	0.00056024772938372	0.134603259108346
904342	chr7	121189387	-33.5790354873013	0.000338175012786268	0.119218529790632
905492	chr7	124404765	61.9261337732236	0.000972571533954244	0.155095986628562
906319	chr7	127032970	27.8758771412489	0.000370639627429193	0.121212018213489
906913	chr7	127806588	51.4005059202307	0.000394997413259554	0.122353105606666
907324	chr7	128094874	44.7332928482923	0.000725505940349729	0.144105462400267
908979	chr7	129251351	49.0682146956556	0.000671499631925719	0.141168445733588
909002	chr7	129253000	62.7563365819468	0.000587934667749981	0.136274236833376
910081	chr7	130126416	42.7381766302218	0.000915641626502308	0.153099944349283
914779	chr7	137686641	46.2386655915972	0.000647607315305917	0.140136180707749
922361	chr7	148396010	45.5905108943308	0.00026752833956026	0.111102737767592
924073	chr7	149469784	46.3910081882652	0.000130400789867755	0.0918911778039376
924458	chr7	149659098	56.4367599160602	0.000403890413640719	0.122749353405878
925050	chr7	150103246	51.1556349939114	0.000751327860846415	0.145243192916979
926168	chr7	150812785	44.4222937519233	0.000552278126215142	0.134165493190695
926318	chr7	150865145	53.2896864269032	0.00085941813591422	0.150394388679615
933581	chr7	156792817	52.108774226791	0.000639965284046331	0.139703674283474
934089	chr7	157071950	69.5341250104408	0.00037080502691032	0.121212018213489
937014	chr7	158352794	48.5940126150414	0.00052525019057663	0.132066164944418
938033	chr7	158968092	53.0016510869686	0.000490931676033151	0.129859685045334
938492	chr8	357674	-44.1089001829638	7.92772564299618e-05	0.0847295398488201
941427	chr8	1900993	26.8570675582988	0.000802910533505321	0.147476198725169
947046	chr8	8243929	67.5192188048022	1.61935989912835e-05	0.0617946411737972
947116	chr8	8301526	43.5760881412374	0.000747973521956173	0.145114889203971
949754	chr8	10875973	57.0571305261645	0.000430459319379862	0.125182076207955
950965	chr8	11726342	54.0980947636389	0.000575022018314423	0.135741697094473
952837	chr8	14122122	50.0659009399065	0.000961610628284446	0.154753714180645
954063	chr8	17014298	52.5769054573729	0.0008599436416037	0.150432900398692
957664	chr8	21906022	51.8525807664555	0.00044475757801308	0.126201473533874
958175	chr8	22067635	43.1975113157048	0.000987980384471439	0.155316922811757
958760	chr8	22431525	45.6615157105277	0.000873839964598066	0.151200521112425
958827	chr8	22446738	50.7687824831596	0.000233937800309437	0.107728154963535
958898	chr8	22462667	45.3247842328733	0.00019337575046035	0.103505918364958
962449	chr8	26532059	-29.243121785353	0.000712692851641485	0.143702725667705
963464	chr8	27800044	56.7956626771228	0.000692076760842667	0.142645494186601
966479	chr8	31128813	31.9496749378908	0.000920006458323372	0.153153242327388
967031	chr8	32517934	41.4913590651092	0.000861441917338748	0.15053916854131
969911	chr8	37822939	41.4635032479065	0.000971333195929757	0.155095986628562
971182	chr8	38853794	47.8051291445873	0.000839416611382039	0.149160979205878
973401	chr8	41908413	61.0728340122874	9.6136001674207e-05	0.086416375677257
981697	chr8	56765980	64.3819655725936	0.000627333821496143	0.138940429520217
986107	chr8	65493711	69.7300624155151	0.000243622483388605	0.109490919518978
986619	chr8	66556191	48.6222054301784	0.00029406559069309	0.115025508003899
987037	chr8	67281920	45.5549594315692	0.000447353482518849	0.126217121744661
988383	chr8	69243339	63.5597308179874	0.000553093862992338	0.134165493190695
990806	chr8	74282974	76.6942167829481	0.000121440374625188	0.0899508929714081
995014	chr8	84213165	25.9543195678427	0.000555395666893981	0.134331637103376
997633	chr8	90996761	43.1119854109806	0.000832029827867068	0.148853503340331
1006682	chr8	106331015	66.4716995321598	0.000384391419348862	0.121569019978422
1012174	chr8	121136551	65.9934378499231	0.000108706720690008	0.0874525828486662
1013775	chr8	124219565	65.2796370863095	0.000582789915471425	0.136170279689495
1015655	chr8	126443993	41.6868862094486	0.000595846760303079	0.136434088748063
1025584	chr8	142145743	32.1869964002737	0.000254925033017697	0.110147360576076
1028249	chr8	143301086	-54.6462284618338	0.000577171105184605	0.135882940212103
1028763	chr8	143498276	44.0189485252339	0.000955354753134849	0.154630406364672
1029763	chr8	143844783	52.1592143931483	0.000420175084050193	0.124442211211101
1031878	chr8	144603757	56.583784882003	0.000566983440787379	0.135325126758475
1032578	chr8	144793788	62.0627848250984	0.000823059809328475	0.148544239370063
1032984	chr8	144898113	51.0848133837007	0.000974307552605459	0.155112944044541
1040782	chr9	5437776	44.5283856518103	0.000493993231927689	0.130166388768614
1044448	chr9	14366335	-49.8076422816343	0.00088320013427851	0.15151805976383
1055112	chr9	35096525	42.0488906684563	0.000612544601732826	0.137757009676713
1056615	chr9	36400880	61.3967838315065	0.000865358206080281	0.150709915354111
1059905	chr9	39566978	-37.5325887193893	0.000506114605047517	0.131046695702542
1060836	chr9	40894830	-37.5325887193893	0.000506114605047517	0.131046695702542
1061450	chr9	41712012	-37.5325887193893	0.000506114605047517	0.131046695702542
1063783	chr9	45351081	-54.5757947744622	0.000110439455641872	0.0876780153130389
1065493	chr9	66135453	-37.630858429911	0.000502216839257757	0.130872992985053
1065674	chr9	66488214	-54.5757947744622	0.000110439455641872	0.0876780153130389
1070670	chr9	75603076	68.0593845973399	0.000818680993266174	0.148228954154526
1071929	chr9	78505278	71.1891255309035	0.000130041197987402	0.0918911778039376
1079151	chr9	90301229	53.7794429284985	0.000737230314780276	0.144773215240365
1080579	chr9	91792664	48.8598358294207	0.000489055327964706	0.129751256695577
1080685	chr9	91926266	37.9673476051208	0.000887807384224722	0.151566727934034
1082792	chr9	94602481	56.9308733663904	0.000111303583407576	0.0876780153130389
1097724	chr9	114245064	47.2979531130265	0.000220397615078523	0.106230631511489
1099229	chr9	115825567	47.422652372777	8.47397280785347e-05	0.0847295398488201
1099268	chr9	115831014	47.422652372777	8.47397280785347e-05	0.0847295398488201
1099307	chr9	115836461	47.422652372777	8.47397280785347e-05	0.0847295398488201
1099346	chr9	115841908	47.422652372777	8.47397280785347e-05	0.0847295398488201
1099385	chr9	115847350	47.422652372777	8.47397280785347e-05	0.0847295398488201
1099951	chr9	116304018	30.1389258520097	0.000265135898103673	0.110642066403348
1101152	chr9	117275802	62.2933431569132	0.00017326532826263	0.100222498159271
1104245	chr9	123698196	75.9374261954845	7.4052262241739e-05	0.0836282568638812
1105300	chr9	124585904	40.4086585896907	0.000418202106479304	0.12429674584509
1105782	chr9	124989543	51.3323058117007	0.000521704124889286	0.132066164944418
1105783	chr9	124989578	65.3200539109839	1.47269913308276e-05	0.0617946411737972
1108709	chr9	127581318	50.8632295977249	7.28730220823204e-05	0.0834811888218941
1108779	chr9	127614952	45.2686949244772	0.000355687428430622	0.121009223088129
1110880	chr9	129294421	53.6535803625901	0.000857976722890651	0.150284066495629
1110888	chr9	129297326	48.1332496856496	0.000706319002505396	0.143522537762325
1111166	chr9	129400295	70.0550295822221	7.63873447139191e-05	0.0841048910701593
1114334	chr9	131084824	56.4249030736259	0.000649901446309786	0.140139134349982
1115800	chr9	131709849	44.7694291934708	0.000932910528935183	0.153936099613808
1116801	chr9	132115018	42.0597474489308	0.000443458208705503	0.126201473533874
1117333	chr9	132318304	31.7444420446953	0.000654845021561632	0.140398035350645
1117683	chr9	132429109	59.8891644278969	8.99990378172487e-05	0.085848055431924
1118445	chr9	132805669	52.1170689421647	0.000659732686043739	0.140692840793132
1119707	chr9	133539178	53.3634928742696	0.00021174393103704	0.105096684813757
1120031	chr9	133722824	63.1727027735828	0.000466842198149663	0.127473044300869
1120845	chr9	134053983	-37.3159538051082	0.000311337970693866	0.116814303704373
1125023	chr9	136293625	47.448738135151	0.00079277811833898	0.147158293006089
1127808	chr9	137218611	58.7221173699684	0.000842114346640569	0.149331933300967
1128016	chr9	137267352	47.3445561327227	0.000209422960180949	0.10491034157423
1128541	chr9	137419271	26.0510694819755	0.000850415479773863	0.150014978345075
1132688	chr9	138987619	63.4797325266407	0.000307246067666335	0.116665080626384
1133483	chr9	139159826	64.7144580506474	0.000449380714931741	0.12638230018167
1136746	chr9	139935876	56.1470744656674	0.0006360524904822	0.139626560829374
1138456	chr9	140285008	43.8099568010858	0.000187474478887509	0.102849582973757
1140594	chr10	120263	67.8849796077901	6.06094569422765e-06	0.0542781014735803
1140680	chr10	181738	60.5914457863999	0.000375161718771337	0.121212018213489
1140683	chr10	181821	51.3866260250153	6.46207028306221e-05	0.0814928312495599
1140697	chr10	182278	54.8981106878458	0.000814579298355645	0.147831247061051
1140865	chr10	361095	49.92968718948	0.000185516307959102	0.102527095083362
1141435	chr10	634481	47.9200064165692	0.000584217209074847	0.136228083374549
1141637	chr10	734845	42.941969368262	0.000836960049468791	0.149090517836639
1141737	chr10	779082	29.1447791700064	0.000933080760801694	0.153936099613808
1142003	chr10	851033	61.510828253122	0.000576534354904421	0.135882940212103
1142310	chr10	1034319	43.7764197575099	0.000645651791976798	0.140043936748683
1142314	chr10	1034524	63.0982793944075	0.000748163016059458	0.145114889203971
1142415	chr10	1102504	54.4957376426157	0.000754702256213717	0.14534391045553
1142547	chr10	1200627	65.7516335382805	2.81343782589067e-05	0.0682528042951949
1144615	chr10	3110204	59.3149448014887	3.77315455957053e-05	0.071080479133155
1145559	chr10	3818470	62.7699776802713	0.000377856270906519	0.121284075375812
1145580	chr10	3825751	57.8908508171278	0.000444101909920633	0.126201473533874
1145632	chr10	3848314	58.646629257547	0.000953200379717529	0.154420711558054
1146450	chr10	5339638	57.1437274529571	0.0007920749386335	0.147100104673438
1146740	chr10	5593950	42.7049959005163	0.000815742176314169	0.147964694115097
1147006	chr10	5734711	73.7919283979523	3.1053680864227e-05	0.0703666308911744
1147088	chr10	5853525	48.4492098404305	0.000596998392134177	0.136534070915854
1147226	chr10	5931306	52.6683529910834	0.000654041090940484	0.140398035350645
1147243	chr10	5932127	74.1529174817626	0.00010031276344114	0.0865331933167269
1147431	chr10	6060631	39.2385491454297	0.000507380534507744	0.131046695702542
1147627	chr10	6187200	57.2339392009261	0.000551919501722301	0.134165493190695
1148840	chr10	7452478	47.0326639026687	0.00013832513282204	0.0933860339547087
1148861	chr10	7454765	35.2282678666893	0.000185876454179876	0.102635362731163
1149146	chr10	7709284	65.4444147981983	0.000270498180761759	0.11148765838081
1149253	chr10	7829599	63.7317607488944	1.33922260489786e-06	0.0388854100130055
1149261	chr10	7830421	65.4241527995238	0.000552904387365378	0.134165493190695
1149293	chr10	7860873	50.8352492683174	0.00043079030184263	0.125182076207955
1149470	chr10	8079073	50.8550476920602	0.000746960754152458	0.145114889203971
1149508	chr10	8089766	44.9381981148936	0.000809887921791993	0.147801798288341
1149515	chr10	8090529	60.1566328741039	0.00044704026042119	0.126217121744661
1149533	chr10	8092086	57.3630519923394	1.63490434640494e-05	0.0617946411737972
1149538	chr10	8092339	55.300336715688	0.000933827485500966	0.154007508455392
1149545	chr10	8092781	59.4362981827459	1.88659120249357e-05	0.0617946411737972
1149566	chr10	8094077	56.8188580407592	0.000735992366009219	0.144773215240365
1150834	chr10	10776823	49.2585800818858	0.000126428832214571	0.0913081679014096
1151138	chr10	11217731	66.6614261250324	0.000139210272232285	0.0933860339547087
1151722	chr10	11784673	67.1758821830108	0.000267553958257751	0.111102737767592
1152367	chr10	12171545	64.1186376458528	0.000674330831515379	0.141348189786091
1152476	chr10	12238134	50.471031778894	0.000207110731522706	0.104836843948449
1153926	chr10	13341719	39.4730778314328	0.000845335164852389	0.149580623872094
1154045	chr10	13389618	60.5920085933661	9.83191193060304e-05	0.086416375677257
1154119	chr10	13424792	69.5583813326335	1.85054270987386e-05	0.0617946411737972
1154122	chr10	13425476	56.5027653550294	0.000378922984697961	0.12144711445131
1154124	chr10	13425638	50.6547499950279	0.000863051381930961	0.150541645751507
1154288	chr10	13570929	64.0934583710865	0.000375114566175153	0.121212018213489
1155200	chr10	14614165	65.1089799074897	5.01190882985133e-05	0.075616818322804
1155457	chr10	14880151	56.6090547513699	4.24540288769242e-05	0.074262065582651
1155521	chr10	14921325	49.5642316611343	0.00045503092884839	0.126710508105313
1155795	chr10	15139057	54.5740023640675	0.000496635825595397	0.130499749548402
1155811	chr10	15139685	40.5139265705815	0.000950573736551951	0.154293180285724
1155884	chr10	15210167	30.7758553960094	0.00070913072871269	0.143678145506656
1156141	chr10	15413163	68.9263966245404	0.000108283104556656	0.0874525828486662
1156145	chr10	15413341	51.1987276402396	0.000774246861449944	0.146209765904295
1157445	chr10	17495968	41.2330611997161	0.000690097487431357	0.142615928355883
1157804	chr10	17851019	59.4529607066434	0.000141463449694756	0.0938243349274659
1157954	chr10	18098009	59.4529607066434	0.000141463449694756	0.0938243349274659
1158184	chr10	18430088	48.9519018495375	0.000929316559378369	0.153617227827474
1158358	chr10	18689922	65.7645204919668	0.000196464977531749	0.103768593331674
1158551	chr10	18948514	47.9978192513178	0.000769800371030373	0.146016624096063
1158552	chr10	18948557	55.9525471619252	0.000222144173305703	0.106475344597439
1159016	chr10	20104855	38.355987030423	0.000108922101084522	0.0874525828486662
1160061	chr10	21789417	37.2394014540594	0.000581056418979764	0.136017830523042
1160166	chr10	21823490	76.1260574615501	0.000376032440919756	0.121212018213489
1160762	chr10	22609733	75.1960204463206	5.18460426131386e-05	0.0762557604910689
1160826	chr10	22625055	46.8809615574542	0.000442959304044988	0.126201473533874
1161156	chr10	23003361	62.1151480405765	0.000692699752842539	0.142645494186601
1161405	chr10	23384714	64.8106174190432	0.000724047774648675	0.144033230714967
1161476	chr10	23461735	63.760294644539	0.000187123084314577	0.102849582973757
1161482	chr10	23462567	54.9675382513145	0.000715596683535829	0.143702725667705
1161537	chr10	23481805	58.5110334859888	0.000691459786324199	0.142645494186601
1161894	chr10	23984628	64.2574577663737	1.24716553980528e-05	0.0617946411737972
1162124	chr10	24497851	50.4959445347718	0.00041711671224126	0.124289445467922
1162159	chr10	24533790	49.6171496132283	0.000401073206856512	0.122627290829149
1162608	chr10	25012788	72.8865051078908	7.4210859714923e-05	0.0836282568638812
1162945	chr10	25465570	34.4313265494361	0.00045473461486705	0.126710508105313
1162949	chr10	25465810	62.5084244374215	0.000391043992830878	0.121955664276232
1164690	chr10	28034802	60.8831714788599	0.000373587258495785	0.121212018213489
1164821	chr10	28287455	58.4547587522727	0.000432962319776048	0.125344496099717
1165202	chr10	28822056	49.1439536555232	0.000852787553047596	0.150118657832546
1165339	chr10	28966440	41.6723722271582	0.000862856708843298	0.150541645751507
1165807	chr10	29546511	51.6924896381642	0.000471042232617324	0.127813187488068
1166917	chr10	30723157	51.2477745176127	0.000370504406794318	0.121212018213489
1166919	chr10	30723208	58.3523285774927	7.16544634841892e-05	0.0833828448818227
1166920	chr10	30723284	53.8559014892418	0.000297738574482055	0.115445341434161
1167181	chr10	30994202	55.1096003214825	9.67817086221688e-05	0.086416375677257
1167544	chr10	31423197	56.979437788033	0.000328769862081655	0.118246098499841
1167665	chr10	31608716	48.7269214919956	0.000605326577823402	0.137111564185032
1167683	chr10	31609851	42.2918485185501	0.000948627291565701	0.154279762111942
1167868	chr10	31990110	58.2533194890897	0.000364954172298928	0.121212018213489
1167872	chr10	31996065	59.1144448770043	0.000291483029252146	0.114767504211392
1168175	chr10	32345232	51.3407565032673	1.34001809303408e-05	0.0617946411737972
1168481	chr10	32636251	61.4710738135549	0.000185451598916749	0.102527095083362
1168485	chr10	32636377	52.630783069936	0.000105294875160645	0.0870877777259811
1168587	chr10	32800704	36.9245729690762	0.000866155742982901	0.150734859660172
1168759	chr10	33269609	36.1104553760476	0.000832481841380674	0.148890393033725
1169021	chr10	33623323	55.4717737131795	9.59817043651861e-05	0.086416375677257
1169978	chr10	35103794	44.6606583598638	0.000992957306367766	0.155561466643262
1170609	chr10	35625476	54.6556878415302	0.000959832642518376	0.154708836293724
1170882	chr10	35929053	47.1378742200983	7.3473634224741e-05	0.0836282568638812
1172282	chr10	38265637	50.3003639758395	0.000363815693814263	0.121212018213489
1172399	chr10	38445694	61.0860386774373	1.68660464683352e-05	0.0617946411737972
1172522	chr10	38692241	43.283928935544	0.000414912314459272	0.12380639069844
1172972	chr10	42862908	50.7133070212704	0.00054568722344736	0.13390797686427
1172975	chr10	42863255	59.1937275017466	0.000785459574416386	0.146845652257719
1173039	chr10	42971658	52.8765630433785	0.000194882230424715	0.103649809662238
1173220	chr10	43249306	48.5709156199626	0.000669792829431683	0.141168445733588
1173245	chr10	43250637	61.6826837946627	0.000314704420099126	0.117067908068305
1173281	chr10	43277939	49.3158308869429	0.000578072386227222	0.135909300718438
1173284	chr10	43278172	56.9949679340419	0.000374222429579102	0.121212018213489
1173492	chr10	43446105	29.0919727960205	0.000950988555416528	0.154308074309795
1173720	chr10	43600551	51.3086346509883	0.000977953514914794	0.155112944044541
1173724	chr10	43601015	48.8375898822149	0.000650788621616826	0.140139134349982
1173801	chr10	43634186	55.0389411811264	0.000364136239090547	0.121212018213489
1173962	chr10	43750486	46.1800589180972	0.000866380274538696	0.150739185765792
1174314	chr10	43912818	53.6394534506781	0.00021893256665504	0.105880193130977
1174557	chr10	44069792	60.2786289336234	0.000952262096157012	0.154393008402417
1176297	chr10	46168404	43.7483759655367	0.000722666977353597	0.143992126915431
1176921	chr10	46970678	53.7328366529086	4.07104340552326e-05	0.0728283618287934
1177144	chr10	47168299	46.1753546801748	0.000450505486269103	0.126384450856418
1177587	chr10	47752723	46.0830063667301	0.000412103904705045	0.123744580905755
1177888	chr10	48261053	46.0830063667301	0.000412103904705045	0.123744580905755
1177976	chr10	48354853	64.6599100494456	0.000317021271026511	0.117088761073485
1178104	chr10	48439139	41.6218357887369	0.000647966761220237	0.140139134349982
1178997	chr10	49732447	53.0597103031966	0.000455232889644133	0.126710508105313
1179001	chr10	49732580	42.2558885229574	0.000434197739866992	0.125344496099717
1179688	chr10	50602885	44.8883439839021	0.000786628913599436	0.146845652257719
1179703	chr10	50604519	41.4887594638797	0.000919885878117004	0.153153242327388
1179716	chr10	50606165	52.9218592429682	0.000216642620600388	0.105651518034031
1179869	chr10	50817685	67.0649879442026	4.66057267922115e-05	0.075616818322804
1179886	chr10	50819004	55.8141649799986	0.000376359128438213	0.121213066734792
1179976	chr10	50904492	38.2252591930268	0.000530854988036505	0.132526086962099
1180070	chr10	50970220	49.7758201310852	0.000414889529785952	0.12380639069844
1180085	chr10	50976572	43.6784023851462	0.000984738633972772	0.155299661513043
1180416	chr10	51489265	59.1580796492377	0.000674414190978382	0.141348189786091
1180545	chr10	51572459	40.0794781131898	0.000254713491018772	0.110147360576076
1180549	chr10	51572615	54.3135636104021	3.7744424172307e-05	0.071080479133155
1181105	chr10	52383619	55.6567072233154	0.000224718843534783	0.106821968061528
1182885	chr10	57390981	53.7554747919518	0.000967074505046013	0.155017787444597
1183167	chr10	58427594	29.9364920375255	0.00069975785521813	0.14304320430697
1183691	chr10	60027268	57.1230178005299	0.00010136468408628	0.0865331933167269
1183693	chr10	60027331	55.8763415333075	9.06129909626295e-05	0.085848055431924
1183695	chr10	60027438	46.490904313633	5.44148787600878e-05	0.0786963196115553
1183707	chr10	60028973	47.096887025298	0.000398286236917855	0.122627290829149
1183764	chr10	60095130	56.9331420645121	0.000538381882923201	0.133128455046543
1184292	chr10	61469002	48.463395618423	0.000963826681518157	0.154940681518459
1184915	chr10	62703947	47.1419995990801	0.000117033253718943	0.0891253660754419
1184922	chr10	62704409	53.2896957645117	7.11600860050377e-05	0.0833828448818227
1185466	chr10	63942670	48.2041677765761	2.60556416485641e-05	0.067595228884509
1185738	chr10	64564277	58.0216483516414	0.000197179586818913	0.103768593331674
1185794	chr10	64575710	57.702974293525	0.000197219238199727	0.103768593331674
1186310	chr10	65225563	52.3251273399823	0.000297068063017734	0.115342659911301
1186427	chr10	65389173	62.0452859241973	1.70043974010538e-05	0.0617946411737972
1186668	chr10	65801272	62.8237831820726	0.000262637204243341	0.110520048626884
1187604	chr10	68685268	60.8401697477744	0.000719070309979582	0.143841660098461
1188476	chr10	70166647	56.0198694550553	0.000704475785995691	0.143381616693713
1188958	chr10	70481121	59.8866211269859	0.000835934757001446	0.149090517836639
1189226	chr10	70661268	42.1499926560401	0.000885070771205554	0.151560450043428
1189560	chr10	70940109	48.4112152154745	0.000887837023122201	0.151566727934034
1189669	chr10	71038689	46.6555931137784	0.000179100038166226	0.101507635820471
1189717	chr10	71078061	47.2474301333042	0.000714928468934247	0.143702725667705
1189744	chr10	71079339	51.2781981534736	0.000242687662194701	0.109276059380956
1189938	chr10	71211651	52.0571800913565	0.000230192980430749	0.107202927847894
1190085	chr10	71332302	43.4193529189985	0.000205273548416813	0.104836843948449
1190102	chr10	71336089	58.0367621964153	0.000360896694014049	0.121202487465264
1190172	chr10	71404546	65.7684689302354	0.000329976853758666	0.118341926928686
1190343	chr10	71562042	47.8515579060687	0.000923449416698335	0.153251394064078
1190888	chr10	71993246	46.6436191611768	6.50003696167782e-05	0.0814928312495599
1191823	chr10	72575962	53.9062182015531	0.00026590915988487	0.110788706053505
1192228	chr10	72972266	41.5066881382511	0.000839348667938155	0.149160979205878
1192255	chr10	72977294	64.3348894355662	0.000758954588243029	0.145556133592326
1192281	chr10	72996263	48.8139044726586	0.000840665369717916	0.149211539065739
1192514	chr10	73155973	58.0454624461088	3.66271837589007e-05	0.071080479133155
1192951	chr10	73473236	51.8241597200761	0.000971416559487924	0.155095986628562
1193104	chr10	73557778	50.7362939652657	0.000382989566631109	0.121569019978422
1193124	chr10	73565861	54.9010200439292	0.000118787412099733	0.0893363512258018
1193417	chr10	73724643	46.1794704480856	0.000871045038716743	0.150994007376227
1193650	chr10	73848578	56.1462915347545	0.000696927063969225	0.142854152953937
1193878	chr10	74033567	54.8082396697728	0.000526999733764686	0.132095294348055
1193939	chr10	74057871	58.6912326852729	0.000334369445043541	0.119051918354021
1194003	chr10	74080965	44.2493466614103	0.000750135181159948	0.145243192916979
1194087	chr10	74113941	46.5923177682104	0.000524436968718503	0.132066164944418
1194805	chr10	75012198	43.4941288507833	0.000624825008182536	0.138919714943507
1195280	chr10	75490292	49.9413891426926	0.000842269521314556	0.149331933300967
1195592	chr10	75633712	77.3174780236709	1.81721423584945e-05	0.0617946411737972
1195646	chr10	75670789	51.8270207413244	0.000337632116630766	0.119174877026336
1195647	chr10	75670824	62.8923112108617	0.000234919121706411	0.107810168674129
1196328	chr10	76573455	69.5209163067566	8.56174790100491e-06	0.0597862668019886
1196356	chr10	76585725	51.0485467972543	0.000232246746366214	0.107539721572155
1196619	chr10	76871102	45.9764540720119	7.02656319141868e-05	0.083352830616528
1196860	chr10	77036232	50.7909920469477	0.000524051818872038	0.132066164944418
1196999	chr10	77156091	60.1629405846234	0.000366122310339746	0.121212018213489
1197036	chr10	77159291	46.6500338488816	0.000196367451261475	0.103768593331674
1197038	chr10	77159356	68.8430099365192	1.50862273619252e-05	0.0617946411737972
1197080	chr10	77163813	70.785668148729	8.86354171612417e-06	0.0597862668019886
1197485	chr10	77871989	58.2993049322725	0.000661049882080352	0.140736731011073
1197488	chr10	77872245	62.8704784248793	0.000340522784707724	0.119432305973816
1198008	chr10	79051960	46.7083405710893	0.000546868653080746	0.134041590629513
1198266	chr10	79373306	54.2519760774606	0.000507645689807506	0.131046695702542
1198293	chr10	79396873	55.2495044325921	1.70534189363416e-05	0.0617946411737972
1198633	chr10	79686409	56.5764822973153	0.000920160415109419	0.153153242327388
1199351	chr10	80504435	61.3305166314319	0.000287062473116635	0.114003891681653
1199688	chr10	80827107	69.0015377510583	0.000250794258901401	0.110147360576076
1199737	chr10	80830177	48.59335939515	0.000461372132952905	0.127093145625274
1199772	chr10	80839746	36.7958171430963	0.000911475471847103	0.152835797772969
1200235	chr10	81077095	52.3986917638076	0.000191501888413968	0.103377556938657
1200286	chr10	81107780	63.4479171552399	0.000488645643563034	0.129712415816525
1200446	chr10	81206730	54.4403579892917	0.000821434591799072	0.148452540251056
1200531	chr10	81297057	51.8425101436471	0.000557146410649095	0.134500271057803
1200725	chr10	81586343	47.8083195464068	0.000591628883377721	0.136277248355579
1200729	chr10	81586587	58.4587472485633	0.000633906041060635	0.139398578935027
1200734	chr10	81586784	49.1537923932838	0.00087032705796232	0.150963440741966
1200882	chr10	81741559	50.6653935315789	0.000757761067318434	0.145450628098595
1200981	chr10	81838391	65.424562691303	0.000795220981388366	0.147260014466641
1201166	chr10	81965116	41.9778343176752	0.000391871326624662	0.122003834194506
1201432	chr10	82214210	52.8311680736988	0.000888992723769811	0.151657456515953
1201449	chr10	82216257	69.6912269367504	0.000204585942278562	0.104781729979849
1202212	chr10	83634872	61.8602272372239	0.000102015339218931	0.0865331933167269
1203302	chr10	86300524	59.103144469726	6.38870536177576e-05	0.0814701305316002
1204267	chr10	88123230	41.2579138011961	0.000592068869432058	0.136277248355579
1204284	chr10	88125262	59.4643196464918	0.000648876248833452	0.140139134349982
1204817	chr10	88471086	47.2218592126704	0.000116117907741306	0.0890065276743928
1204895	chr10	88516558	45.5065039992776	0.000809476027542071	0.14778683118461
1205039	chr10	88699273	59.1465659779293	0.00038572775240747	0.121569019978422
1205108	chr10	88728524	38.5236498701181	0.000710570345967247	0.143702725667705
1205116	chr10	88730082	53.9729651867712	0.000968771079926888	0.155095986628562
1205484	chr10	89102385	47.8083195464068	0.000591628883377721	0.136277248355579
1205685	chr10	89419091	33.1167760871291	0.000858564295783504	0.150314657323779
1205697	chr10	89419838	63.9782156799079	0.000626539335056697	0.138919714943507
1206249	chr10	90790786	52.680648523554	0.000284740252474259	0.113769445150748
1206327	chr10	90967005	40.5915961538837	0.000715271221353241	0.143702725667705
1206332	chr10	90967658	34.8071881038234	0.000743355593875052	0.145083294167447
1206465	chr10	91174492	44.3138401194754	0.000578724973178562	0.1359357258017
1206553	chr10	91295534	49.954086391102	0.000244856574873971	0.109600764145303
1206559	chr10	91295729	79.4653748552095	3.68651214709945e-05	0.071080479133155
1206616	chr10	91404413	47.9700857632113	0.000357874116465235	0.121025037580463
1206620	chr10	91404681	56.1639850640189	0.000261655812307226	0.110353119575925
1207045	chr10	92617884	59.1204644256152	0.000171219616203493	0.100222498159271
1207206	chr10	92922986	55.701099889681	0.000583303186685374	0.136228083374549
1207212	chr10	92923326	69.0645664497188	0.000444279439487302	0.126201473533874
1207450	chr10	93392837	50.1564421424172	0.000377258701895932	0.121244908080459
1207527	chr10	93558254	40.6690158803716	0.000880689550940641	0.151358112610461
1207634	chr10	93667879	60.4730504259622	0.00013841762310467	0.0933860339547087
1207664	chr10	93684563	68.6363922579519	1.19965936072738e-05	0.0617946411737972
1208293	chr10	94333045	47.8506261867137	0.000587007230087791	0.136228083374549
1208849	chr10	94823200	49.2834801209931	0.000715181674901038	0.143702725667705
1208896	chr10	94833274	61.463384817616	5.22812529792127e-05	0.0766383273647573
1209440	chr10	95462461	58.9855707724523	2.5234469579909e-05	0.0670738535364482
1209554	chr10	95653686	50.3536199162731	0.000171173590253093	0.100222498159271
1209565	chr10	95654144	65.2709880599126	4.77485041906681e-05	0.075616818322804
1209871	chr10	96162619	55.0058614670168	0.000955643047406101	0.154630406364672
1209880	chr10	96163302	43.6669435673033	0.000306109854454577	0.116665080626384
1210226	chr10	96943504	52.0931986475871	0.000178735321818353	0.101501468044882
1210551	chr10	97320454	50.4858785327538	6.2434766004726e-05	0.0811255427447742
1210554	chr10	97321055	46.0350039937234	0.000753320027350931	0.145257427640834
1210908	chr10	97849997	49.8989351539018	0.000794123013708517	0.147254257851004
1210934	chr10	97889449	62.8512978662158	0.000867519979182709	0.15084127590848
1210936	chr10	97889641	56.0610706045178	2.81603140705144e-05	0.0682528042951949
1211279	chr10	98346461	60.431866233223	0.000396287932327974	0.122509943730377
1211284	chr10	98346608	59.1942595887079	0.000267421212051885	0.111102737767592
1211558	chr10	98592985	58.7387628463284	0.000301680772994426	0.116079596145492
1211559	chr10	98593030	53.2121286237459	0.00024663297592612	0.109878701931368
1211998	chr10	98948238	67.6236383425601	0.000450183635567416	0.126384450856418
1212224	chr10	99079156	52.4603310295529	0.000400174511032043	0.122627290829149
1212289	chr10	99094682	58.0453553848831	0.000102809861073183	0.0866770505266311
1212406	chr10	99161110	63.5056074544024	3.2359705229934e-05	0.0710052283084839
1212565	chr10	99258932	49.9279197846721	8.67005616908167e-05	0.0851707091761143
1212761	chr10	99393184	51.8928995644306	0.00010485672762686	0.0870877777259811
1212880	chr10	99461925	28.5766126256929	0.000725680207840755	0.144105462400267
1212975	chr10	99531192	49.0853151254419	0.000185388876343175	0.102527095083362
1213045	chr10	99581888	54.9097652417835	0.00027925449219391	0.112813959877606
1213259	chr10	99734821	60.180438935708	0.00041041349303182	0.12363681911732
1214027	chr10	100992396	54.4503457747117	0.000209383134044716	0.10491034157423
1214031	chr10	100992715	44.3214077684122	0.000956964864091009	0.154702316147096
1214034	chr10	100993324	80.5750398933438	1.37626350371123e-05	0.0617946411737972
1214207	chr10	101190597	40.9415249033714	0.000879572220488454	0.151358112610461
1214209	chr10	101190765	49.5961552156341	0.00013817066582852	0.0933860339547087
1214292	chr10	101283302	57.7045551563235	3.87881024833693e-05	0.071080479133155
1214325	chr10	101295271	63.8920505839264	0.000455215656788514	0.126710508105313
1214474	chr10	101381067	55.2559796852814	0.000930768200507945	0.153774967980536
1214858	chr10	101768958	65.166982866791	5.94527550105844e-05	0.0811255427447742
1215061	chr10	101945470	57.0236603421518	0.000136510886553017	0.0933860339547087
1215070	chr10	101946890	50.8940723497302	0.000502207340953749	0.130872992985053
1215271	chr10	102106874	42.1240740910629	0.000368063709118292	0.121212018213489
1215458	chr10	102279759	68.4399341270985	0.000105372883418217	0.0870877777259811
1215514	chr10	102322580	50.410266206241	0.000428765168842587	0.125182076207955
1215595	chr10	102397928	59.2605329506941	4.12634856150074e-05	0.0732966693148779
1215611	chr10	102413650	58.3661307675878	0.000930924868066224	0.153774967980536
1215731	chr10	102469808	55.348575843293	0.000980766475562351	0.1552084887862
1215774	chr10	102484467	45.4392315166517	0.00039270481061947	0.122035409219216
1215814	chr10	102495603	46.7125302955036	0.000200324934084876	0.104369567159165
1216047	chr10	102589505	40.9288948358169	0.000456771663737504	0.126868977576276
1216230	chr10	102756866	51.8283743836728	0.000513299411061033	0.131518217496285
1216249	chr10	102758965	44.682688575488	0.000773749944502882	0.146195518622037
1216269	chr10	102759776	60.0850318589132	3.54888674212716e-06	0.0508999448541434
1216318	chr10	102774240	49.0029406504953	0.000102873821941159	0.0866770505266311
1216399	chr10	102808050	58.1975994189513	0.000891729506878783	0.151791262312854
1216444	chr10	102822874	56.0360197826384	0.000882608836590928	0.15151805976383
1216454	chr10	102826541	49.8503722192449	0.00035688306717168	0.121025037580463
1216471	chr10	102832012	67.2282818381767	7.84565243078448e-05	0.0847295398488201
1216576	chr10	102892567	61.0638853188303	4.1519584563299e-05	0.0734061393301074
1216632	chr10	102906360	50.1251272422358	0.000227055026521898	0.106864637298755
1216746	chr10	102979112	50.3615823489714	0.000631703816219181	0.139374232218558
1216787	chr10	102986580	43.5406180520283	0.000597221080935954	0.136534070915854
1216798	chr10	102987088	30.7163761363275	0.000988526448292211	0.155316922811757
1216817	chr10	102988862	67.0305262592156	2.07030558208783e-05	0.0617946411737972
1216927	chr10	103044212	67.6701680972314	3.38303623340582e-05	0.071080479133155
1216970	chr10	103070203	57.4801840232266	6.34757842747335e-05	0.0813342428372355
1217018	chr10	103113946	46.1383340329014	2.6592942760302e-05	0.0678698946943271
1217318	chr10	103454459	61.1259311998601	1.80878318318918e-05	0.0617946411737972
1217322	chr10	103454683	46.79054716714	0.000458282547478519	0.126868977576276
1217557	chr10	103578450	52.2725208309196	0.00078697172084684	0.146845652257719
1217949	chr10	103880549	81.0066511127338	9.24238970869375e-07	0.0379997070096205
1217981	chr10	103893394	50.9320609030759	0.000103958254458657	0.0868156072972658
1218829	chr10	104402499	36.2469835394045	0.000625202830997137	0.138919714943507
1218867	chr10	104405015	46.5048586219183	0.000806504363541003	0.147601247435727
1218880	chr10	104409242	62.7550499637548	0.000287725379737006	0.114003891681653
1218999	chr10	104474388	51.5276056067385	8.42649342222464e-05	0.0847295398488201
1219825	chr10	105128195	44.8251828795375	0.00049558727397575	0.130324530937332
1220042	chr10	105254138	48.784129147205	0.000320812891417289	0.117797469324195
1220110	chr10	105314932	50.4420502754816	0.00079787168416557	0.147451179534589
1220589	chr10	105614332	59.7123845685847	0.000480216848320068	0.128916291956175
1220900	chr10	106014766	52.4733502588781	0.000821871063543262	0.148469955461062
1220920	chr10	106028657	41.561636033661	0.000125616111178528	0.0910965383555398
1221011	chr10	106097475	55.2269735497379	0.000597368549225116	0.136534070915854
1221019	chr10	106098286	42.0091897735432	0.000999804632705903	0.155992059378227
1221224	chr10	106401483	41.5171115902402	5.58848610675074e-05	0.0790060188212629
1221234	chr10	106402575	68.9269770210673	1.28611446406298e-05	0.0617946411737972
1222837	chr10	110671883	64.0663335660864	0.000527941268545513	0.132095294348055
1223300	chr10	111768042	57.3224048286566	1.07247262111715e-05	0.0617946411737972
1223389	chr10	111922849	71.2328507310769	3.15946690788815e-05	0.0703666308911744
1223468	chr10	111970125	54.045713960512	0.0003731163200544	0.121212018213489
1223768	chr10	112259303	48.1367359967929	0.000262928128666721	0.110580832926182
1223839	chr10	112327858	58.4580853768493	8.86038980903773e-05	0.0852099737442887
1224121	chr10	112631025	57.2927120047864	0.000801413563978547	0.147476198725169
1224125	chr10	112631906	64.1906711146532	0.000875004243760076	0.151200521112425
1224180	chr10	112679793	67.6721768598864	4.85147496583176e-05	0.075616818322804
1224273	chr10	112838582	59.3817462962324	5.56764156124078e-05	0.0790060188212629
1224945	chr10	114207718	60.2315485195183	0.000109842918813871	0.0876780153130389
1226164	chr10	115803787	45.6937059281863	9.27037762617935e-05	0.0859766026008501
1226541	chr10	116163555	60.4968446422947	0.000447297987778248	0.126217121744661
1226559	chr10	116164951	45.1607708393511	0.000574517573140046	0.135699471496426
1226719	chr10	116391684	49.8694994540012	0.000676686321107229	0.141549315899086
1226885	chr10	116581473	58.5654524488115	0.000521489729037864	0.132066164944418
1227218	chr10	117189475	49.3699298543739	0.000771992208374146	0.146177169272886
1227604	chr10	118031046	38.7286789216184	0.000626390121392753	0.138919714943507
1227606	chr10	118031154	56.0799956420373	6.55473264642066e-05	0.0814928312495599
1227613	chr10	118031830	43.4309738952373	0.000697327070164516	0.142858567817196
1227999	chr10	118501097	64.8261973982047	1.4134722386327e-06	0.0395212596512305
1228143	chr10	118608868	52.9594242970171	0.000216754926166047	0.105651518034031
1228328	chr10	118893563	56.6390478534961	0.000586602273849869	0.136228083374549
1228358	chr10	118896611	45.5542732753046	0.000737143685505968	0.144773215240365
1228366	chr10	118896817	45.2956713881167	0.000979439341503626	0.155188675206257
1228374	chr10	118897103	54.58609795621	0.000750252389985937	0.145243192916979
1228393	chr10	118899654	44.3411029827457	0.000979893288824935	0.155188675206257
1228445	chr10	118925723	52.2492986920145	0.000108321513454958	0.0874525828486662
1228451	chr10	118926552	60.4400266830891	0.000135564493074355	0.0933860339547087
1228556	chr10	119000590	58.6204078094976	0.000950029502063933	0.154293180285724
1228785	chr10	119291158	52.6048676626259	0.000855580476863199	0.150229467776722
1228884	chr10	119310965	56.2180485137534	0.000219999342154651	0.106192022616466
1229028	chr10	119444643	44.1193279709611	0.000717110615343565	0.143702725667705
1229374	chr10	120045853	65.742559926073	0.000171522487712601	0.100222498159271
1229555	chr10	120355984	55.7014909020334	1.72776830670615e-05	0.0617946411737972
1229692	chr10	120514827	53.6464790200044	0.000312278078531697	0.116938691519847
1230216	chr10	120924914	57.975161957925	0.000135888629542887	0.0933860339547087
1230222	chr10	120925232	63.9107280506393	0.000719508233352711	0.143850389330825
1230311	chr10	120965897	52.9023328125213	0.000777293535067358	0.146329184421026
1230314	chr10	120966156	50.4445867872424	0.000680973872732814	0.141778347136254
1230857	chr10	121301308	52.4659551080725	0.000100111392177237	0.0864727613361026
1230955	chr10	121356071	51.819084700339	3.54401239378662e-05	0.071080479133155
1231025	chr10	121410904	53.5088575376255	0.000131459476356898	0.0921474781296093
1232005	chr10	122739253	59.1556197192912	0.000396632071821055	0.12251630385104
1232489	chr10	123355595	72.8978727695872	1.75964913455641e-05	0.0617946411737972
1232504	chr10	123357607	46.0543285963861	0.000694216102042432	0.142674259109737
1232842	chr10	123688198	65.9366290389764	0.000294766452453223	0.11506215172093
1232900	chr10	123733750	58.5518134357272	0.000254716169866765	0.110147360576076
1233193	chr10	123922905	47.5925486052824	5.03361426743749e-05	0.0756978376998178
1233654	chr10	124275588	63.6639187407435	0.000813835227934464	0.147831247061051
1234125	chr10	124895493	56.038420757799	0.00010743311559403	0.0873249087209264
1234145	chr10	124896794	43.3905357362426	0.000380524461631624	0.121497872267407
1234201	chr10	124908244	61.3237972955215	0.000946412455543109	0.154181290780236
1234207	chr10	124908483	59.0884297884542	0.00010232220279401	0.0865484384313857
1234675	chr10	125438539	38.0599680448021	0.000707143148879943	0.143545115495317
1234852	chr10	125651027	53.9762268303156	0.000229894376878743	0.107132340636695
1234867	chr10	125654936	56.1664067165544	0.000244513920737712	0.109600764145303
1235151	chr10	125851430	69.3835591991774	0.000386522794993612	0.121569019978422
1235153	chr10	125851501	46.6672239459084	0.000701980408418928	0.143074182426595
1235228	chr10	125929707	44.0979761548673	0.000965910488912705	0.154974468318246
1235442	chr10	126077911	53.1485543541427	0.000559631162570221	0.134603259108346
1235488	chr10	126107296	41.1167192531505	0.000341718356913999	0.119432305973816
1235493	chr10	126107623	56.4675590411984	6.34806162365961e-05	0.0813342428372355
1235557	chr10	126139345	59.2223955122062	0.000497515059394129	0.130531985169334
1235852	chr10	126277685	45.6728192612814	0.000242185433889494	0.109219409672419
1235897	chr10	126294572	66.8858450936788	9.20656198008111e-05	0.0859359697532208
1236109	chr10	126383316	38.0182687920418	0.000993909487738021	0.155638474069187
1236183	chr10	126431940	42.4097518981232	0.000700305833253435	0.14304320430697
1236209	chr10	126433213	35.7673107186337	0.000425549767815079	0.124976946121703
1236472	chr10	126605547	50.4230771189851	9.07735336402731e-05	0.085848055431924
1236846	chr10	126847626	59.7476178062398	0.000481729932415504	0.128916291956175
1237488	chr10	127512180	60.8185010576529	0.0002403854354825	0.10878810425692
1237862	chr10	127917747	45.9408629930209	0.000545229936019699	0.13390797686427
1239120	chr10	129534854	59.05047560627	0.000698217106262487	0.142963313872483
1239142	chr10	129537250	45.9648467298877	0.000773537335013473	0.146195518622037
1239467	chr10	129846929	57.5844756479672	0.000332300742007437	0.118892953300671
1239494	chr10	129862255	53.2834956699812	0.00036487998044866	0.121212018213489
1239905	chr10	130220306	50.5838717743475	0.000341687773013959	0.119432305973816
1240094	chr10	130366125	55.3805844254972	0.000130678231928095	0.0918911778039376
1241702	chr10	131757584	66.4420236033113	0.000778978850523888	0.146382704302399
1241780	chr10	131766566	61.427597665817	0.000620315005263084	0.13846689155478
1241819	chr10	131770067	53.3131392212287	0.000202934072492641	0.104654323348366
1242060	chr10	131934358	55.9118758198541	0.000814531593531384	0.147831247061051
1242072	chr10	131935015	49.8203891530826	0.000567349592770195	0.135369720423387
1243146	chr10	132847044	60.2838528018108	0.000597104427828541	0.136534070915854
1243526	chr10	133029976	54.3398112756702	0.000330593978963015	0.118506953054382
1243656	chr10	133109338	46.9819642543519	0.000447119997306351	0.126217121744661
1243658	chr10	133109414	56.8711294493915	2.75273228936199e-05	0.0682528042951949
1243682	chr10	133110233	60.6562336640185	0.00020755708493688	0.104836843948449
1243869	chr10	133251951	51.0385074598484	0.000632161414799653	0.139374232218558
1244023	chr10	133375624	64.7334983247206	0.000146291577146972	0.0951697813242363
1244549	chr10	133795423	59.8212880315878	0.000989765065799681	0.155316922811757
1244892	chr10	133946573	40.8122239300166	0.000179668255069555	0.10156049960382
1245233	chr10	134046189	41.6001295659879	0.000357857823747576	0.121025037580463
1245330	chr10	134069761	63.5564745232152	0.000102997814202817	0.0866847746643778
1246976	chr10	134599778	59.0616698037805	0.000211615382479231	0.105096684813757
1246996	chr10	134601067	44.1427326577133	0.000391720910637343	0.122003834194506
1247008	chr10	134601860	62.0244822996011	0.000767368811930883	0.145943849909452
1247026	chr10	134602649	53.260448311543	0.000989673958086563	0.155316922811757
1248199	chr10	134901365	46.8641856098019	4.68904966462004e-05	0.075616818322804
1248482	chr10	134973711	49.3446495803804	0.000457967410028603	0.126868977576276
1248496	chr10	134974556	56.6091192580349	0.00026146483968435	0.110334216259221
1248806	chr10	135040066	58.9225426247096	0.000784031132087703	0.146845652257719
1248872	chr10	135049770	62.1156351454399	0.000762944782375342	0.14571980523298
1248886	chr10	135050387	55.9215213550956	6.19660863676334e-05	0.0811255427447742
1248890	chr10	135050666	55.7398734023672	0.000119520479008095	0.0893363512258018
1249002	chr10	135071547	48.5282167047241	0.000402053089794455	0.122635289346108
1249099	chr10	135088406	49.4029822486139	0.000720454950684827	0.143863760978736
1249295	chr10	135139639	44.707077965822	0.000650942340406294	0.140139134349982
1249309	chr10	135148379	59.0165745888932	7.41139891759191e-05	0.0836282568638812
1249383	chr10	135171044	75.8106191253505	0.000204940607530968	0.104836843948449
1249545	chr10	135207710	43.2728880390489	0.000862157212871554	0.150541645751507
1249786	chr10	135342459	49.969286469344	0.000606278256251986	0.137221918389997
1249933	chr10	135451741	44.367518355324	0.000622790842471466	0.138814323441933
1250608	chr11	208812	59.9474924559181	0.000549441242857555	0.134165493190695
1250656	chr11	235929	53.7751603527159	8.94896109528514e-06	0.0597862668019886
1250746	chr11	280004	52.4204619809908	0.000518463905871643	0.131963747445578
1250797	chr11	288894	65.9991489446303	0.00026591719689475	0.110788706053505
1250806	chr11	289227	65.7162431882088	0.000164935319380119	0.0999500659205328
1250901	chr11	310882	53.2464865434285	0.000519828050058619	0.132066164944418
1250905	chr11	311162	38.6838125165668	0.000889454163155597	0.15166067501735
1250910	chr11	311351	35.5512595962369	0.000197184689682199	0.103768593331674
1250916	chr11	311926	57.0369261299286	0.000963559123754986	0.154940681518459
1250920	chr11	314087	61.6225173655314	6.00934284165881e-05	0.0811255427447742
1250935	chr11	316434	63.2908790442025	3.68972730274838e-05	0.071080479133155
1250945	chr11	318431	35.5113114439979	0.000200772430514706	0.104386592108056
1250950	chr11	318620	38.7399449550266	0.00087034420637488	0.150963440741966
1250954	chr11	318900	53.2491413327464	0.00051953376763367	0.132066164944418
1251144	chr11	369047	73.0333372267451	8.6219635278751e-05	0.0851707091761143
1251251	chr11	382272	56.8794984464416	0.000174220444123465	0.100350067038402
1251612	chr11	448139	45.2285249687567	0.000978444634544118	0.155146240332936
1251628	chr11	450397	59.925838874148	0.000792764669079035	0.147158293006089
1252153	chr11	561450	64.158605597565	4.87788790670306e-05	0.075616818322804
1252202	chr11	569045	52.9085158484565	0.00071358910977429	0.143702725667705
1252399	chr11	615692	53.8641934323861	0.000308612940916028	0.116665080626384
1252401	chr11	615844	49.7145805377939	0.000197374077584875	0.103768593331674
1252682	chr11	695666	51.037444165386	0.000717199815281154	0.143702725667705
1252687	chr11	696072	46.6960483831465	0.000711164743825926	0.143702725667705
1252744	chr11	707525	30.706392522103	0.000776525890461533	0.146329184421026
1252764	chr11	710876	74.2414844801844	8.30842028146115e-06	0.0597862668019886
1253074	chr11	777344	47.3681633463973	0.00025533561541579	0.110147360576076
1253172	chr11	798011	51.0686651368248	8.25797994602893e-05	0.0847295398488201
1253211	chr11	804497	54.3308145209828	0.000650530290666255	0.140139134349982
1253224	chr11	805490	37.7811019774579	0.000462013375674989	0.127093145625274
1253395	chr11	833341	58.7989970325418	0.000323239940427806	0.117828996362677
1253474	chr11	849373	52.2413398862553	0.000986676234692663	0.155316922811757
1253484	chr11	849782	54.250724373064	0.000828220277306475	0.148780465638859
1253732	chr11	911070	58.0039367692709	0.000207754708643153	0.104836843948449
1253786	chr11	925792	51.9907660567833	0.000715885004307676	0.143702725667705
1254275	chr11	1072239	67.4783366082473	2.49778909849589e-05	0.0670738535364482
1254816	chr11	1247533	51.0534750000072	0.000671779064517931	0.141187873317257
1255019	chr11	1283698	54.681996663733	0.000113138240199904	0.0880268871721856
1255241	chr11	1358555	31.1107898060141	0.000964292067378931	0.154940681518459
1255410	chr11	1410751	69.5980569332058	0.000131267169409672	0.0920981928156253
1255426	chr11	1411769	58.0441062678883	4.41713772004227e-06	0.0538194298567361
1255437	chr11	1412330	55.4835355326612	7.8882223674593e-05	0.0847295398488201
1255782	chr11	1504752	33.8100795142946	0.000378452168397788	0.121421705882155
1256398	chr11	1715498	39.662440991082	0.000292189806875457	0.114767504211392
1256621	chr11	1802342	55.5596919832255	0.000829905679304114	0.148829909064832
1256835	chr11	1874398	47.8018596537611	5.93591424577153e-05	0.0811255427447742
1256948	chr11	1896955	62.6843223654495	0.000651689318996684	0.140165375863101
1256984	chr11	1910629	62.764699399562	0.000119322684828017	0.0893363512258018
1257286	chr11	1990546	31.6350892212415	0.000801928765025684	0.147476198725169
1257421	chr11	2014137	67.026659972405	6.48308040951951e-05	0.0814928312495599
1257537	chr11	2036574	63.2911939983356	0.000135551283367063	0.0933860339547087
1257766	chr11	2143956	56.4855328976858	8.32056986455355e-05	0.0847295398488201
1257875	chr11	2165445	52.4967796804496	9.85072544046557e-05	0.086416375677257
1258520	chr11	2398606	49.2167344090073	6.21341976590922e-05	0.0811255427447742
1258609	chr11	2421240	73.0680836018354	7.88249367466861e-05	0.0847295398488201
1258779	chr11	2466463	68.1830634107966	1.98919241811535e-05	0.0617946411737972
1259731	chr11	2890491	53.9361575206197	0.000112952628624937	0.0880268871721856
1259820	chr11	2906322	59.4607922469387	0.000161664909664	0.0993050056286028
1259826	chr11	2906914	41.6643887648817	0.000891728689480251	0.151791262312854
1259830	chr11	2907196	62.0691857353774	7.39816133962974e-05	0.0836282568638812
1259888	chr11	2923649	51.841026091651	0.000134313510916001	0.0932034039129106
1259891	chr11	2923907	54.6980077529064	0.000941239287081015	0.154038257235041
1259997	chr11	2950760	51.6691660299276	0.000341488108707522	0.119432305973816
1260000	chr11	2950888	52.0239582288264	0.000116741496520734	0.0891120067845242
1260221	chr11	3078666	65.4948972501482	0.000471265532590299	0.127813187488068
1260400	chr11	3159345	59.7872676695675	0.000485480521429618	0.129355939234983
1260511	chr11	3186333	48.0788948588111	5.15101065640381e-05	0.0762481887421488
1260516	chr11	3186475	59.8350062896153	4.48914657915582e-05	0.0754787509164517
1260519	chr11	3186599	45.7154774218392	0.000189004858642333	0.103053297478098
1261545	chr11	3877275	46.2963795337347	0.00027480944679302	0.112263079262393
1262037	chr11	4629411	46.6171620385318	0.000924776206505412	0.153353230015382
1263096	chr11	6502469	43.0655796354306	0.000462535912563777	0.127093145625274
1263193	chr11	6625025	55.4107191129967	0.000452896323562219	0.12654383888015
1263283	chr11	6676649	50.3816790411581	0.000272292204988734	0.111779133553208
1263970	chr11	8041368	57.0263866177443	0.000715873969943847	0.143702725667705
1264337	chr11	8350618	45.0119718700644	0.00091186652113373	0.152835797772969
1264604	chr11	8705121	54.4501341928593	0.000565657695513661	0.135222460333066
1265037	chr11	9039052	68.6922213256149	0.000152326801461949	0.0970316151336933
1265264	chr11	9286489	63.1624470976499	3.81570626627058e-05	0.071080479133155
1265265	chr11	9286522	72.4538877060551	0.000101862367982281	0.0865331933167269
1265349	chr11	9336309	57.2625378086327	0.000193532477503463	0.103505918364958
1265351	chr11	9336403	48.8267593092694	0.000287980519328141	0.114003891681653
1265766	chr11	9595028	42.6953672209951	0.000388553835578909	0.121815338724012
1265788	chr11	9596103	48.7533957366233	0.000521934534180716	0.132066164944418
1266415	chr11	10472150	61.0389844875599	4.64105141983103e-05	0.075616818322804
1266495	chr11	10527340	52.7897207504774	0.000314544375766516	0.117067908068305
1266831	chr11	10953094	58.1310456684604	0.000180034904326364	0.10165589405984
1266956	chr11	11177675	72.214735216957	7.61349235963607e-07	0.0379997070096205
1267276	chr11	11643338	47.9288551616991	0.000352447379263603	0.120551609939934
1267382	chr11	11863363	61.3123998945988	8.11859259342435e-05	0.0847295398488201
1267559	chr11	12131879	62.6598895123781	0.000156225036776465	0.097874791069455
1267668	chr11	12246232	61.4360506576164	0.00040367054271113	0.122736065790955
1267686	chr11	12263935	56.5599299295247	0.000803576711421482	0.147476198725169
1267785	chr11	12399310	46.2332789916492	5.78262485582215e-05	0.0801684755127792
1268370	chr11	13298810	65.539085923479	4.7173644110382e-05	0.075616818322804
1268387	chr11	13299918	51.3950000754564	0.000603336377623055	0.136988931389212
1268489	chr11	13484691	51.7404746569257	0.00030896212599294	0.116665080626384
1268558	chr11	13689412	60.0078332434959	0.000258218099237441	0.110147360576076
1268573	chr11	13690530	40.8162740760953	0.000497770319810945	0.130531985169334
1268574	chr11	13690577	60.153152097667	1.14176780910357e-05	0.0617946411737972
1268575	chr11	13690628	47.4396837357826	0.000754941752772041	0.145352953930617
1268718	chr11	13986006	64.0978403312916	3.71182915364784e-05	0.071080479133155
1268941	chr11	14380116	53.5383610107223	0.000859119667978771	0.150377016013652
1268980	chr11	14402724	60.8622157334549	0.000140014920732861	0.0933860339547087
1269144	chr11	14665090	66.060643896915	0.000224841882569094	0.106821968061528
1269362	chr11	15095578	38.7911843136934	0.000364051401594392	0.121212018213489
1269962	chr11	16626641	58.6084951538121	5.18580772720036e-05	0.0762557604910689
1269975	chr11	16628426	45.8771879287528	0.000315712877460989	0.117079211586453
1269999	chr11	16635328	62.4997075005467	0.000325209842338674	0.117996721578871
1270098	chr11	16813454	59.3211942123099	0.000786948733488076	0.146845652257719
1270219	chr11	16946394	53.7258360975765	0.00057795615173178	0.135909300718438
1270309	chr11	17035663	79.9231047358795	3.06913814101023e-06	0.0508999448541434
1270313	chr11	17035846	46.4403727048959	0.000739474428913689	0.144893406206324
1270624	chr11	17298154	43.5203975480017	0.00045757057192665	0.126868977576276
1270828	chr11	17497585	52.7315990220668	0.000580349770814384	0.136017830523042
1270879	chr11	17533463	45.9326075919588	0.000803081634005089	0.147476198725169
1271167	chr11	17756903	48.0503529081829	0.000183294418550397	0.102319319090026
1271356	chr11	18033979	58.7541915331582	6.85275421805912e-05	0.082878063471685
1272438	chr11	19367915	47.6015547354081	0.000836508558591617	0.149090517836639
1272499	chr11	19477447	39.6664747088773	0.000917125829396689	0.153153242327388
1272720	chr11	19798800	44.928928062408	0.000589901308546506	0.136277248355579
1272922	chr11	20022685	29.7335605433133	0.000984675881207077	0.155299661513043
1273082	chr11	20182559	62.5756832398805	0.000125975269465309	0.0911818179795928
1273235	chr11	20409143	60.9944139880915	0.000230471860205941	0.107202927847894
1273402	chr11	20623014	65.7962741624259	2.53889135998111e-05	0.0670738535364482
1273407	chr11	20624363	55.2149495970298	0.000236678503992514	0.108091917542391
1273773	chr11	21502533	27.4806147714954	0.000816983128987585	0.148047501332147
1273968	chr11	22112836	58.6873583331407	0.000946283861704364	0.154181290780236
1274158	chr11	22646942	37.8483071183001	0.000843687444840029	0.149478011363654
1275011	chr11	25211552	34.0384589259437	0.000701671965204273	0.14307080954676
1275593	chr11	27015735	60.6483090011553	0.000177946856337893	0.101386866567564
1275594	chr11	27015793	45.8912489600745	0.000308858813161989	0.116665080626384
1275802	chr11	27494032	54.0341742656432	0.000178234967074978	0.101474435843801
1275807	chr11	27494150	48.0663955348842	0.000292648328458483	0.114813586170133
1277327	chr11	31818515	49.0239255586214	0.000848507260938537	0.149979966051883
1277345	chr11	31822271	54.5393921740892	0.000635791393962693	0.139626560829374
1277398	chr11	31832285	64.7011498762527	0.000215967484186059	0.105651518034031
1277506	chr11	31846871	46.3062874457039	0.000825356785588018	0.148544239370063
1277507	chr11	31847161	50.3863445958331	0.000551825729294972	0.134165493190695
1277516	chr11	31848123	50.6021359941626	0.000296897387938812	0.115342659911301
1277518	chr11	31848520	54.7750923269616	0.000305329197057162	0.116651050639454
1277681	chr11	32112638	68.6178766304717	1.31601551503314e-05	0.0617946411737972
1277937	chr11	32448361	48.2965262837042	0.000693189698696436	0.142645494186601
1277979	chr11	32456087	45.5919359272202	0.000963949615204229	0.154940681518459
1278756	chr11	33397892	61.5512093425504	0.000551447256322145	0.134165493190695
1279050	chr11	33824249	59.2391472957998	0.000253034822611001	0.110147360576076
1279339	chr11	34074013	38.8607523051927	0.000988414949500043	0.155316922811757
1280021	chr11	34937485	64.9601814455324	0.000168948099217061	0.100073203263305
1280033	chr11	34938373	61.0396006085522	0.000298262009679896	0.115470378066489
1280130	chr11	35167845	37.1110224932761	0.000833356140460802	0.148940016675165
1280415	chr11	35672207	47.9048794332346	0.000158360512374694	0.0984771498908896
1280941	chr11	36399094	49.4157262707701	0.00058404221185814	0.136228083374549
1280942	chr11	36399241	61.4359801942531	0.00076489958880304	0.145819800877441
1280944	chr11	36399426	43.6824628525789	0.000791410970787693	0.147081794862038
1283556	chr11	43569030	60.1229200035275	3.88859880995654e-05	0.071080479133155
1283616	chr11	43604877	53.6759187861762	0.00069347243180973	0.142649546708052
1283832	chr11	43963551	61.7675379047195	0.000217209713583615	0.105651518034031
1284193	chr11	44325474	55.8818797660151	0.000497443472732964	0.130531985169334
1284231	chr11	44330959	42.2765165243349	0.000562110122067435	0.134886953770658
1284256	chr11	44338728	49.6528205227564	0.000693024853867247	0.142645494186601
1284317	chr11	44383567	55.8389527950513	0.00026032837621682	0.110220993755928
1284633	chr11	44654513	56.6551318396602	0.00031819232954617	0.117363877884932
1285051	chr11	44971210	41.0321260280589	0.000787953447620121	0.14693034622667
1285052	chr11	44971255	42.7137879757653	0.000752484705036788	0.145250327501439
1285060	chr11	44971932	55.7373274101385	0.00027957236288369	0.112813959877606
1285339	chr11	45202178	60.179908971176	0.000250902366411067	0.110147360576076
1285352	chr11	45202653	61.7687164982649	0.000418012812386278	0.12429674584509
1285780	chr11	45677181	48.5987655879382	0.00076407202153557	0.145772467851875
1285801	chr11	45685961	46.0934981335395	0.000500255955111633	0.13081355332469
1285860	chr11	45720507	48.9935820621856	0.000920366096103607	0.153153242327388
1286023	chr11	45825999	51.450031376485	0.00032231711511365	0.117828996362677
1286091	chr11	45869269	53.680414461362	0.000154931098373242	0.0976828550615721
1286093	chr11	45869381	50.0688794868928	0.00057396967329965	0.135699471496426
1286246	chr11	45943549	53.77045498425	0.000181581523561526	0.101919346590206
1286445	chr11	46143462	53.1746477824862	0.000268830721082168	0.111143836307383
1286568	chr11	46259050	59.5301403536406	9.46465117404727e-05	0.086416375677257
1286606	chr11	46265073	71.2716371632244	6.03745811790445e-07	0.0379997070096205
1286754	chr11	46354293	51.0579056861934	0.000757404421743842	0.145450628098595
1286781	chr11	46366990	49.8829581267485	0.000691551087156721	0.142645494186601
1286906	chr11	46402211	50.8727181671289	0.000534055581242123	0.132860714368567
1286923	chr11	46403035	51.0722081665281	0.000246703870649991	0.109878701931368
1286954	chr11	46411237	57.7272434201325	3.36942520122595e-05	0.071080479133155
1287213	chr11	46615694	51.8826769132756	0.000156575798219173	0.0979009780735247
1287691	chr11	46938493	51.7290592528768	0.000614117937549961	0.137899068623596
1287739	chr11	46958189	49.2221790753114	0.000422887086222771	0.124574963829081
1288501	chr11	47430324	58.1062778911748	0.000586952750352828	0.136228083374549
1289038	chr11	47736972	54.9595986105193	0.000144282693105153	0.0949167899717834
1289095	chr11	47788332	51.095808436194	0.000535011076265991	0.13290439184487
1289099	chr11	47788545	48.9992294967637	0.000552952134262907	0.134165493190695
1289422	chr11	48002889	58.5542994805865	0.000302682282325136	0.116271168694715
1289427	chr11	48003076	48.7975788774952	0.000973371139569055	0.155112944044541
1289451	chr11	48023398	59.7925526758892	0.000101885922641007	0.0865331933167269
1290651	chr11	54764646	64.9455250693725	0.000345030787522886	0.119979013107066
1290998	chr11	55977405	47.8691943746375	0.000471343624737599	0.127813187488068
1291184	chr11	56457725	57.0108140111803	0.000350044179953426	0.120403564024019
1291388	chr11	57004307	67.0201001281415	0.000943895739590475	0.154103216401465
1291457	chr11	57078977	45.6133221103265	0.00079680880133611	0.147382316808893
1291478	chr11	57091670	50.7112847155018	0.000184598211757916	0.102319319090026
1291737	chr11	57267316	58.5902551746831	0.000252651337346864	0.110147360576076
1291760	chr11	57281869	55.8096390818665	0.000352888229359533	0.12060039107226
1291855	chr11	57334815	59.8534749773311	0.000247604485264478	0.110041689806295
1291997	chr11	57435609	47.1024486077307	0.000855689740439726	0.150229467776722
1291998	chr11	57435650	57.1144555084867	7.65368757743415e-05	0.0841048910701593
1292675	chr11	58673578	52.0229187184831	0.000982329134869044	0.155299661513043
1292759	chr11	58826265	65.5360854259455	9.06663430245145e-05	0.085848055431924
1292786	chr11	58874448	50.8456597474708	0.000441658113435942	0.126104917259572
1292842	chr11	58940832	49.0213185914035	0.000740602675418422	0.144936911049902
1293204	chr11	59436281	50.2066768893872	0.000138056724224345	0.0933860339547087
1293285	chr11	59523061	44.8465952168386	0.000961216450650754	0.154723261472543
1293290	chr11	59523567	66.201360349775	0.000132966584874753	0.0927731949039577
1294124	chr11	60692124	42.9594809854493	0.000455360302451104	0.126710508105313
1294293	chr11	60775645	57.8519027491758	0.00016745575597954	0.100073203263305
1294834	chr11	61100381	62.3427269298377	7.92229855922102e-05	0.0847295398488201
1295017	chr11	61196939	61.9007256586501	1.11926526304944e-05	0.0617946411737972
1295414	chr11	61355363	50.940151868279	0.000785070914054992	0.146845652257719
1295555	chr11	61447706	52.5832262251806	0.000850456455517882	0.150014978345075
1295917	chr11	61583890	47.5704732505309	0.000358426719078072	0.121025037580463
1296490	chr11	61892282	46.1070481720189	0.000892929929264654	0.151927086867184
1297074	chr11	62313287	48.4867598046899	0.00093638072527778	0.154007508455392
1297075	chr11	62313320	42.2484954495704	0.00074013198168677	0.144903676625201
1297125	chr11	62341074	70.6267893085487	0.000264793311685831	0.110642066403348
1297387	chr11	62420834	51.6141115228699	5.88195212516286e-05	0.0811255427447742
1297454	chr11	62438958	54.9751001547426	0.000968762298917834	0.155095986628562
1297735	chr11	62554121	45.9610956557075	2.53832320584898e-05	0.0670738535364482
1297751	chr11	62554843	46.6762568706142	0.00019673520026598	0.103768593331674
1297849	chr11	62599751	57.5191709248133	0.000526423782880852	0.132066164944418
1297851	chr11	62600023	75.8002738774035	6.30117147148735e-05	0.0811988072156874
1297944	chr11	62649066	73.9331104283322	4.668865935401e-06	0.0538194298567361
1298033	chr11	62694185	41.9121610974375	0.000461738774772384	0.127093145625274
1298707	chr11	63535403	59.6984845915249	0.000383360061762986	0.121569019978422
1298814	chr11	63580779	59.9693800337807	0.000921574665320959	0.153164005634901
1298880	chr11	63606254	49.7600878249445	0.000108813995454942	0.0874525828486662
1298884	chr11	63606450	53.2633082937675	0.000882455028809598	0.15151805976383
1299078	chr11	63687169	55.1401513221263	0.000137276902428174	0.0933860339547087
1299269	chr11	63767305	47.1224740298068	0.000782663740507929	0.146723893788277
1299285	chr11	63768255	44.4372392272529	0.000253231811972398	0.110147360576076
1299604	chr11	63858003	53.2790863555097	0.000850777092748175	0.150014978345075
1299905	chr11	63952942	53.7131552775377	0.000960033418525175	0.154708836293724
1299919	chr11	63953862	59.5758600128175	0.000868961223652993	0.150944722856323
1299978	chr11	63975778	46.9431725197035	2.00565714410239e-05	0.0617946411737972
1300069	chr11	64002033	30.7308444506635	0.000647655394319926	0.140136180707749
1300070	chr11	64002087	53.5950916519964	0.000325162457167196	0.117996721578871
1300122	chr11	64009360	42.9260037406133	0.000763409940373938	0.14571980523298
1300187	chr11	64020004	72.5774407986962	0.000900210284781006	0.152417415339866
1300270	chr11	64038124	60.5570998123645	0.000525126713809614	0.132066164944418
1300310	chr11	64052332	44.1397220223586	0.00053236366648541	0.13269530630013
1300404	chr11	64067345	59.6210736564911	4.76300527569797e-05	0.075616818322804
1300494	chr11	64085063	57.5487969104907	0.000271040276641698	0.111507742280869
1300497	chr11	64085533	54.6334258991216	0.00048575971623858	0.129355939234983
1300502	chr11	64086046	54.2799384133793	6.16700619618073e-05	0.0811255427447742
1300561	chr11	64110069	63.708119138261	0.000848361802786356	0.149979966051883
1300636	chr11	64126941	49.9734774237794	0.000254692257842777	0.110147360576076
1300716	chr11	64163637	49.9298051818432	0.00041133924150054	0.123744580905755
1301133	chr11	64410313	53.5663461057032	0.000756204083501	0.145410571819025
1301140	chr11	64410588	58.1328263621074	0.000917366857696881	0.153153242327388
1301270	chr11	64481309	45.4178400849763	0.000505788549967056	0.131046695702542
1301343	chr11	64510168	44.148471678888	0.000402748774432314	0.122665569881117
1301358	chr11	64511335	48.680725211916	0.000449701455157901	0.12638230018167
1302147	chr11	64808243	47.1841345497679	0.000937957749862986	0.154038257235041
1302154	chr11	64808727	41.9481853266376	0.000694348527175564	0.142674259109737
1302244	chr11	64851313	48.8290950015759	0.000786800374357454	0.146845652257719
1302349	chr11	64884638	49.296319025787	8.65653509632634e-05	0.0851707091761143
1302484	chr11	64949095	55.2485059661559	0.00017351361262707	0.100222498159271
1302756	chr11	65082733	49.2041527391686	0.000390753839828737	0.121955664276232
1302759	chr11	65082875	60.0803797021561	0.000408486063425986	0.123413047015359
1303073	chr11	65190181	43.5269911786543	0.000593607000282217	0.136293286596732
1303078	chr11	65190894	55.7207945737466	0.000278245407528573	0.11280408783119
1303255	chr11	65265359	51.062500455301	0.000293290015483783	0.114900739324955
1303549	chr11	65343639	64.5262453032762	0.000107550778162788	0.0873249087209264
1303661	chr11	65379138	57.2378923723258	0.000457386661121881	0.126868977576276
[truncated: 2,817 more rows]

## Sheet: Supplemental Table S2
Gene-Methylation score
Gene	Methylation gene-score	# of cpgs per gene
TACSTD2	4990.99	60
PHF13	4661.7	145
MIR9-3HG	3702.15	171
MAP3K11	3681.15	174
BEGAIN	3638.73	295
FAM72D	3616.07	99
ZNF503-AS2	3613.9	100
SOX1	3577.14	159
TLCD2	3557.01	56
NR2F2	3506.69	255
SIK2	3448.28	50
GATA3-AS1	3423.39	124
RERE	3398.98	106
MYO1C	3381.46	99
KANSL1-AS1	3336.28	311
MNT	3303.77	135
MMP17	3234.96	184
METRNL	3117.93	265
TMEM121	3078.9	104
ING1	3077.08	106
FAR1	3072.9	32
TMEM9B-AS1	3062.7	94
GFI1	3046.9	79
LMO4	2957.49	65
CBX4	2948.96	126
PGGHG	2948.65	101
DUSP14	2947.35	70
CMTM3	2932.13	77
CMB9-55F22.1	2914.81	169
FEM1B	2886.61	82
ACACA	2886.28	22
WRAP53	2868.55	26
ONECUT1	2865.41	130
CBFA2T3	2845.43	215
CDK10	2842.83	318
ZNRF1	2827.05	94
SSH3	2822.07	195
ITPKA	2803.69	127
PDPR	2799.59	150
SLC35E2B	2799.22	123
FAM72A	2792.05	42
MATN1-AS1	2788.05	126
WNT4	2771.38	96
PHF23	2758.36	30
CDC42EP4	2738.53	129
KLHL17	2731.95	151
ABR	2726.45	274
HIC1	2705.17	82
METTL9	2701.17	42
SH2B3	2701.14	103
ZFHX3	2675.35	176
SLC35C1	2673.73	72
CHD9	2655.01	75
BICDL2	2652.06	89
GOLGA8B	2644.36	96
RFX5	2641.93	19
LRRC37A2	2637.54	418
C15orf39	2635.46	77
EXOSC6	2596.63	260
JUP	2596.33	82
SLC16A3	2594.06	182
PTPN14	2568.48	40
MMP25	2567.33	147
CHPT1	2567.27	43
LRRC8D	2558.95	83
CDK2AP1	2554.86	135
RAB40C	2550.27	146
KIF5B	2526.57	62
NUP85	2524	152
CAMK2N1	2521.96	62
RPS26	2520.32	145
ANKLE2	2514.96	129
DDX42	2513.18	95
SALL1	2498.19	140
IPMK	2493.18	60
PAX2	2491.31	308
CBX8	2485.86	123
NHLH2	2464.96	49
DOC2B	2455.05	123
ZNF423	2451.33	265
ZNF205	2436.44	161
MEGF6	2417.3	139
GPR137B	2414.36	73
SYNGR3	2411.91	99
FASN	2411.05	182
FTSJ3	2407.46	135
RNASEH2B	2387.75	30
IRX3	2384.95	94
IRX5	2378.85	166
CTDSP2	2373.92	70
H3-3A	2373.25	59
ZIC2	2371.7	81
NPTX1	2367.7	160
IFITM1	2347.33	58
FOXF1	2346.99	67
VSX2	2344.15	93
SEPTIN9	2343.06	294
MYO1E	2342.51	43
RP11-63G10.4	2339.11	35
IRX6	2324.83	133
RPP25	2318.92	41
FAM53B	2306.85	57
FKBP4	2303.19	47
NR4A1	2300.07	81
EBF3	2299.23	179
HOXB-AS1	2288.75	137
TUFM	2285.01	140
LINC02875	2282.22	65
TCERG1L	2280.5	283
ARGLU1	2276.68	35
WASH3P	2256.05	96
C1orf220	2251.81	81
LBX1	2251.58	100
APOLD1	2243.7	82
TMEM266	2236.09	30
PTF1A	2234.77	114
HMX2	2232.03	57
LOC145845	2231.8	39
MLLT6	2228.21	34
POU3F1	2225.83	71
ZFP36L1	2224.88	131
CHD1L	2222.7	45
HES3	2221.39	61
SOCS3	2215.93	89
AP003774.1	2215.75	205
ONECUT2	2215.48	109
SESN2	2212.24	81
HOXB2	2211.98	225
PLEKHG5	2208.4	88
CACNB3	2208.09	55
SKI	2201.96	133
DLX4	2192.59	118
RAI1	2191.2	98
NLRP6	2191.08	98
IER5	2191.01	76
TPCN2	2190.05	153
PAX9	2187.36	100
PIGV	2183.08	96
NKX6-2	2178.8	210
RP11-707O23.1	2178.33	363
LINC02210	2176.63	266
XYLT1	2175.65	130
BEND7	2172.99	57
S100A11	2172.21	32
CHST1	2171.89	115
HOXC12	2171.08	74
NOTUM	2169.63	69
ISL2	2163.73	172
NME2	2162.26	72
BAHCC1	2162.17	100
FAM222A	2162.08	127
PPA1	2160.31	66
FAM86FP	2158.07	37
TOB1-AS1	2155.9	9
TBX5	2155.68	174
LOC105371031	2153.91	115
NATD1	2147.06	46
IRF2BPL	2143.27	68
BARX2	2140.49	74
ATP2B4	2136.7	43
MAPK8IP1P2	2131.23	281
ZDHHC5	2124.62	45
PRKAB1	2123.22	56
MEF2A	2122.53	93
EFNA3	2118.16	64
RCC2	2116.57	82
ACTN1-AS1	2115.4	87
LHX4	2114.48	97
CIPC	2114.26	37
ATP6V0D1	2113.88	182
RTN4RL1	2113.46	38
LHX5	2109.84	86
MXI1	2106.37	53
SIN3A	2099.24	30
DDX5	2098.84	24
MFSD11	2096.81	64
LZTS2	2092.02	83
CDX2	2086.95	73
GRID1	2085.84	141
HOTAIR	2084.55	49
PAN3-AS1	2083.25	39
NDUFA4L2	2082.29	54
HNRNPF	2077.11	57
AKT3	2072.86	45
CRACR2B	2067.07	149
GCH1	2062.21	50
TMEM9B	2060.54	60
CCDC18-AS1	2056.43	68
METRN	2054.9	120
OMA1	2053.58	61
WDR24	2047.67	175
ANP32A	2044.31	58
ARCN1	2044.21	13
SLC2A1	2043.93	59
PAX6	2042.38	72
SAMD11	2038.6	117
IARS2	2037.38	25
CRAMP1	2034.33	113
SPATA2L	2033.72	262
RET	2033.13	105
SIX4	2032.53	38
ZNF609	2031.7	22
KANSL1	2031.17	481
TMEM63A	2030.03	59
H6PD	2026.89	89
KDM6B	2023.91	89
FAM171A1	2022.25	72
PRMT5	2021.94	39
TMEM80	2020.89	256
ERO1A	2020.55	39
TMEM132B	2015.27	265
SMAD3	2006.82	76
DLEU2	2006.15	56
MTMR4	2001.78	26
KCNA3	1991.36	48
CCND1	1988.08	114
FAM72B	1984.69	56
SULT1A2	1982.3	130
ATP6V1D	1981.47	82
CEP104	1980.09	72
INSM2	1979.96	42
IGHMBP2	1975.83	173
CLDN7	1975.65	31
VENTX	1974.34	73
TBCD	1974.29	226
WNT1	1972.11	39
ZNF646	1963.97	10
RPL36AL	1960.1	57
NSFP1	1959.89	164
FAM20B	1955.31	54
TENM4	1953.88	80
IFFO2	1953.18	131
HSPA14	1950.23	1
FGF11	1946.85	30
ABTB2	1946.45	71
TMEM132E	1945.14	153
TBX6	1944.2	141
ARHGAP23	1943.44	152
MARK3	1940.97	46
TBX15	1939.12	103
BTG2	1938.28	31
PIK3CD	1937.98	102
RAPGEF3	1932.44	93
CLEC18A	1927.42	147
STARD3	1925.13	124
SORCS3	1923.66	63
ST6GALNAC2	1920.99	62
PRPF3	1920.75	5
SRCIN1	1918.52	174
NAV1	1918.01	105
SPAG7	1917.43	77
GSX1	1916.94	117
TSR3	1913.11	53
LRP1	1912.45	29
FOXI2	1909.17	60
ACBD3	1907.07	17
LOC101929340	1903.97	33
XPOT	1901.45	19
FUT4	1901.32	33
DCAF5	1899.2	32
CCDC163	1898.44	101
PGBD5	1897.58	155
LINC00674	1895.26	50
MEX3B	1894.99	78
NKX2-3	1893.95	48
CLEC18C	1892.74	138
UCP2	1891.83	91
SKOR1	1891.17	129
FOXD2	1889.12	150
TFB2M	1887.8	4
TSPAN9	1887.5	171
WLS	1882.27	27
MGRN1	1881.3	120
LPCAT4	1877.38	33
HOXB8	1874.39	32
MYO18A	1871.57	72
FOXG1	1871.44	17
MYO15B	1871.24	133
PARK7	1869.74	44
AMIGO1	1868.83	72
GFRA1	1867.79	56
TM9SF3	1866.26	41
VSIG10	1860.46	41
PDX1	1856.87	58
EPOP	1856.03	69
TNKS1BP1	1855.53	43
TNKS2	1854	17
KCNK13	1853.67	59
CD151	1853.03	94
NBL1	1851.42	63
DCHS1	1850.69	42
ZFPM1	1850.25	168
MIR6080	1849.72	57
TCF25	1849.43	130
RNASEH2C	1844.09	185
SPRY2	1843.14	29
SPIRE2	1842.65	186
CD27-AS1	1842.19	40
SHMT1	1841.9	119
DISP2	1841.69	28
TFAP4	1841.65	59
HOXB13	1840.73	70
GLIS2	1838.06	99
SERINC2	1837.05	75
LRRC37A4P	1833.88	241
MIR3663	1833.19	46
ATP6V0C	1830.88	136
PHLDA2	1830.6	142
DMRTA2	1829.33	139
RFX4	1829.25	94
UBAC2-AS1	1829.09	19
C1RL-AS1	1828.7	59
RNF166	1828.26	125
LINC00863	1828.16	58
SCRN2	1823.92	225
DDX6	1823.14	77
SMG1P5	1821.97	70
FADS2	1819.57	91
HDGFL3	1819.1	27
ATXN7L3B	1816.87	28
FOXRED1	1815.21	82
C15orf61	1815.15	5
TLNRD1	1814.15	39
RNF220	1813.48	70
B4GALNT4	1808.68	137
STK32C	1806.83	271
SMCR8	1804.17	89
PHOX2A	1804.03	61
MIR4683	1803.55	22
EFHD2	1803.15	63
PDE4DIP	1801.19	104
ZIC5	1798.9	31
HOXC8	1798.03	26
FBXO6	1797.82	56
VANGL1	1797.79	48
ABCB10	1796.5	35
PDHX	1796.11	4
GOLGA3	1796.08	97
TMEM132D	1795.57	140
EMX2OS	1793.34	155
AHDC1	1791.77	101
CIB1	1789.44	122
FLYWCH1	1789.12	141
WNT9A	1789.05	35
METTL26	1787.82	181
PAUPAR	1787.48	51
ISLR2	1784.89	47
GLIS1	1784.37	85
HAS3	1782.87	55
KCNJ12	1782.76	168
DIXDC1	1782.74	47
LINC00324	1782.51	55
CLCF1	1782.46	53
CEP83-DT	1781.84	4
WEE1	1779.13	55
MCAM	1778.7	46
MIR4734	1774.43	19
LRRC41	1773.48	41
CISD1	1769.43	38
DPY19L2	1768.98	49
PNMT	1768.47	40
NGB	1766.6	26
RUSC1-AS1	1764.35	17
WASH8P	1764.28	53
RPL5	1761.01	10
FOXB1	1759.7	117
F3	1758.34	29
SREBF1	1756.36	149
ARHGAP27	1755.52	117
PARP1	1753.7	75
FAR2	1752.67	41
PELI3	1750.6	61
LHX5-AS1	1750.48	149
SDK2	1749.1	103
TMEM204	1748.49	203
FOXA1	1747.57	73
FBXL8	1745.91	16
NTN1	1744.33	98
DGKH	1743.9	33
PNPLA2	1743.33	121
GABRA5	1740.92	92
BHLHA9	1740.66	65
NME3	1738.07	32
AMPD3	1735.46	68
HHEX	1734.75	60
SPRYD3	1733.7	29
GRK5	1733.69	119
SPEN	1731.81	32
NGFR	1728.98	55
INAFM2	1726.8	47
LOC101927248	1724.14	33
STXBP3	1723.74	19
PLEKHM2	1721.92	108
C17orf97	1721.86	61
MYO5A	1721.69	60
MLX	1720.8	68
PYCR2	1717.83	73
PHLDA1	1716.19	59
KCNQ1OT1	1715.76	146
SMARCD2	1713.21	125
FOXN3	1711.91	101
ERGIC2	1710.74	10
MAP3K21	1710.71	37
CRY2	1710.11	45
HSP90AA1	1709.77	57
S100A13	1709.42	70
SMG1P2	1709.23	78
CACNA1H	1708.17	281
THCAT155	1706.67	81
PATL1	1703.38	17
ITGA5	1702.73	19
NPEPPS	1702.39	55
RGMA	1702.29	139
NPIPB14P	1702.04	99
ROBO3	1702.01	98
PIDD1	1701.22	101
MAPK8IP1P1	1700.61	237
SVIL	1699.06	91
C11orf95	1698.17	66
ECE1	1697.09	112
DGKE	1695.74	19
TBX4	1694.78	85
MACO1	1693.82	29
RAP2A	1693.04	59
AP006621.5	1692.67	117
RTN1	1691.67	61
LGR4	1690.96	12
DAD1	1690.69	18
FAM229A	1690.53	34
FGF3	1689.59	167
SIX1	1688.55	42
GPBP1L1	1688.11	15
LAMC1	1687.32	54
NT5M	1685.67	107
IFIT5	1685.58	40
SMG1	1684.93	35
BCAR3	1684.61	63
C11orf96	1683.65	52
KANSL2	1683.21	30
UNC93B1	1682.66	62
FAM171A2	1682.34	52
NTAN1	1679.7	34
GSE1	1675.86	329
SPOCK2	1673.71	84
RNF2	1673.65	27
LINC01058	1672.91	20
LOC102724301	1672.16	162
CISD3	1670.89	15
TMEM30B	1670.04	66
USP3	1668.05	59
SFMBT2	1667.04	107
CACHD1	1666.84	54
DMBX1	1666.55	71
PPIF	1664.15	185
TRNP1	1663.81	53
PDXDC2P-NPIPB14P	1663.5	28
CBLN1	1661.68	109
GLRX3	1660.76	149
BEAN1	1660.75	67
DND1P1	1660.55	310
TIGAR	1659.53	22
RELT	1659.38	142
FANCA	1657.63	259
LINC01970	1656.49	63
SLC16A1	1653.08	9
GSTP1	1652.8	61
DNAJC6	1647.45	48
SPNS2	1643.48	99
PPM1J	1643.11	28
ENGASE	1642.29	461
ARHGAP27P2	1640.43	57
CUX2	1636.9	168
ULK1	1636.43	84
RBBP6	1634.93	23
CEP170	1634.59	26
UBALD2	1632.88	81
MSI1	1631.86	72
TSC22D1	1631.75	55
BNIP2	1625.61	25
RP11-259G18.3	1622.97	196
PRPF8	1622.87	39
LIMD2	1622.13	122
MMP23B	1618.73	85
ATG2B	1618.13	15
PLLP	1617.96	45
KRTAP5-AS1	1617.38	93
MCRIP2	1616.81	26
PPP1R9B	1615.38	46
TMTC4	1614.73	27
GNA13	1614.34	25
GRHL3	1613.57	32
BLACAT1	1612.48	30
JDP2	1611.92	59
SPAG6	1609.87	52
NAGS	1609.52	58
PCDH17	1608.17	51
MORN4	1606.64	18
ADRB1	1606.02	69
UNC13C	1605.49	37
TRIM47	1603.27	56
METTL21B	1602.77	107
SETD1B	1602.05	61
TUBB3	1600.68	53
HMX3	1599.86	71
FOXO1	1599.34	69
DUS2	1599.31	145
SLC16A12	1599.17	27
FGF9	1598.28	79
PLEKHD1	1596.14	70
KDSR	1596.04	51
KATNB1	1595.94	34
FAM98B	1595.16	29
FALEC	1593.59	17
PLEKHH3	1592.99	43
RNA5S17	1592.22	29
HSPA12A	1591.78	76
ICMT	1590.63	63
SGPL1	1590.16	18
TP53BP2	1589.96	38
RBP5	1589.61	35
FDX1	1588.49	47
BAMBI	1588.31	50
LINC01220	1587.76	50
FAM83G	1587.25	83
TOLLIP-AS1	1585.45	191
SGF29	1585.39	56
PFN1	1584.73	28
CKAP4	1584.44	48
CCDC24	1583.86	90
FGF19	1583.82	77
SNX11	1583.33	88
ADAR	1580.92	45
SORD2P	1578.04	177
PLEC	1577.81	250
EFNB3	1576.82	26
LINC00543	1576.39	49
HEXIM1	1573.9	33
GRIN2C	1573.22	85
SIPA1	1572.27	38
FBXL16	1571.65	87
CLSTN3	1570.72	39
ARPIN	1570.71	21
DHRS3	1570.69	57
CSNK1D	1570.42	141
DTX1	1569.59	78
SMG1P7	1568.8	120
ZMIZ1	1568.61	190
FLRT2	1567.72	49
HS3ST4	1567.1	91
HIF1AN	1566.55	99
RP11-1055B8.4	1566.1	118
MAP3K8	1565.22	42
ZNF672	1564.1	20
CHRNB1	1562.15	75
NFRKB	1562.04	28
FZD10	1560.24	108
IL16	1558.02	26
BHLHE41	1557.66	49
HS3ST3A1	1556.8	51
HP1BP3	1556.54	82
ZBTB7A	1554.75	225
NBPF26	1554.12	70
SDHC	1552.96	43
CH25H	1551.8	33
ARHGEF16	1550.74	425
LIN28A	1549.6	36
SOS2	1547.91	41
CAPN15	1544.68	53
MED13	1543.39	53
GPN3	1543.06	130
PANX1	1543.02	46
GLUL	1541.23	29
TPBGL	1539.02	66
ANGEL2	1537.83	14
WNT10B	1537.11	50
FZD8	1536.15	39
TNFRSF12A	1535.45	21
MAD2L2	1534.15	36
LTBP2	1533.88	75
EEF1DP3	1532.72	28
LASP1	1532.1	20
LOC101929076	1531.91	34
KCNA6	1530.39	49
TRAF3	1528.4	59
PIEZO1	1528.21	182
TAX1BP3	1527.54	85
TCEA3	1527.53	63
GABRB3	1526.99	66
MIR4505	1526.27	27
GLRX5	1526.08	48
CTSF	1525.44	111
TMPRSS12	1525.03	6
MRPS7	1524.68	95
CDH2	1524.6	80
IFITM3	1524.3	28
SLC9A3R1	1523.09	42
KIF7	1523.01	47
ITGB1	1522.84	51
SEC31B	1520.9	48
DGKQ	1520.51	290
SLC22A18	1520.16	65
SNAI3	1518.96	116
FBXL14	1518.04	48
PLXNC1	1517.99	98
DLL4	1514.78	63
PLEKHG3	1513.5	82
MTA2	1513.41	37
ERVK13-1	1512.97	63
LOC100287808	1511.58	21
ARF3	1511.08	35
RTN4RL2	1509.69	73
KIF26B	1509.67	75
ZNF213-AS1	1508.84	83
MC1R	1507.21	185
SAMD4A	1506.67	98
CROCCP2	1506.31	276
MRPL45P2	1506	120
MIR4492	1505.99	53
PRKCH	1502.86	50
NOP10	1500.59	38
EME2	1500.42	74
MAN2C1	1500.4	67
SLC22A31	1500.12	160
PPIB	1500.1	24
CHRM4	1500.06	54
SLCO3A1	1499.32	103
LINC01686	1497.34	12
CD58	1495.08	29
RBM26-AS1	1494.73	67
HLA-C	1494.29	273
TBC1D30	1493.82	39
UBE2G1	1493.53	50
ZBTB4	1491.01	36
PRKCA	1490.46	51
MIR34AHG	1490.2	49
USP7	1489.27	71
GPS2	1489.02	53
ABCC1	1488.55	73
CYP26A1	1488.28	82
ITGB3	1487.2	26
CORO1C	1485.78	79
FAM181B	1485.34	51
CD7	1485.08	50
SPHK1	1484.5	80
MEIS2	1484.41	66
WFIKKN1	1483.43	163
TRIM37	1483.11	104
NID1	1483.05	60
LOC102031319	1482.45	11
STMN1	1482	41
TUBGCP3	1480.5	39
ZNF263	1479.55	31
AGRN	1478.46	56
BMPR1A	1478.25	50
SP6	1478.19	63
BTN3A2	1478.09	309
LTO1	1477.88	37
DDAH1	1476.65	49
YY1	1474.54	63
RARA	1474.51	48
NKX2-8	1473.78	56
STX6	1470.43	19
TBKBP1	1469.73	81
IGSF9B	1469.22	140
FGF14	1466.87	71
PTPN21	1465.98	38
POLG2	1464.83	11
NOL9	1464.79	18
CNNM1	1462.71	25
SKIDA1	1462.05	46
CCDC92B	1461.87	33
VPS9D1-AS1	1461.27	188
SLC30A1	1460.97	35
FAM89A	1460.68	36
SMIM1	1460.39	106
DPYSL4	1460.15	305
LRRTM3	1460.13	24
TFDP1	1460.06	79
RCN1	1459.65	37
MYO5C	1459.62	29
SLC18A2	1459.2	49
MEF2D	1458.84	59
CDC7	1457.98	73
NEUROD2	1457.91	87
RAB39A	1457.69	20
NBR2	1456.82	177
ARMC5	1456.69	25
SOX9-AS1	1456.05	39
RCOR1	1455.9	57
EPHA10	1455.69	48
MIR193A	1455.38	50
KTI12	1455.36	15
GNG4	1455.35	61
CDT1	1453	46
CDC42EP2	1451.5	51
TTC7B	1449.12	71
PRLHR	1448.97	70
C1QTNF5	1448.65	39
ACOT7	1448.34	87
HPCA	1448.22	43
TLL2	1447.74	54
LMNA	1445.25	53
ITIH5	1445.18	57
FBRS	1444.91	37
RAB40B	1444.9	46
POU6F1	1443.7	40
BARHL2	1443.42	78
CRY1	1441.71	37
JUN	1440.26	30
LHX1	1440.21	37
TRIM66	1438.38	176
LINC01778	1438.13	69
LOC105370708	1437.86	46
KCTD11	1437.73	42
ARF1	1437.72	29
NANOS1	1436.71	86
CCSAP	1435.7	58
SVBP	1434.62	53
PDE2A	1434.01	90
INPP5B	1433.94	40
BMI1	1432.64	38
GAB2	1432.61	67
NEBL-AS1	1432.52	61
LOC100134368	1431.51	18
TMEM200B	1431.2	70
CSMD2	1426.14	68
PPP2R5E	1426.01	29
IL17D	1425.21	59
MUL1	1424.95	43
PPIE	1424.04	43
MTOR	1423.59	34
SNHG9	1421.7	73
PPP2R5A	1421.65	53
HOXC5	1420.96	21
KCNA1	1420.34	61
OTUD3	1420.11	42
TGFB1I1	1418.3	40
SNN	1417.49	76
KIF1C	1417.31	51
CASKIN1	1416.76	75
FOXK2	1416	108
MMP15	1412.6	70
HOXB9	1412.04	56
ADD3-AS1	1411.18	12
GDI2	1410.12	53
RSL24D1	1408.9	16
AC005363.9	1408.59	40
KIAA1217	1408.39	67
CMIP	1405.84	119
CPT1A	1405.79	101
KDM5B	1405.33	40
NPIPP1	1404.16	73
GRB2	1402.63	38
HS3ST6	1401.78	83
RP11-326C3.7	1401.35	48
ZCCHC24	1401.08	66
FAM118B	1400.32	66
POU4F1	1400.07	44
CREB3L1	1399.77	75
RAB27A	1399.46	30
ADRA2A	1399.13	42
WNT3A	1399.04	76
HSD17B12	1398.92	31
TOX3	1397.43	54
MIR8072	1397.42	15
TTC41P	1397.34	14
TMEM117	1396.98	25
PPP4R1-AS1	1396.69	44
SLC25A10	1395.99	102
C12orf57	1395.53	44
NR5A2	1394.87	56
WNT3	1394.61	130
PHB2	1393.94	7
RAB1B	1393.6	70
SLC43A1	1392.66	33
SFXN3	1392.32	45
RETREG3	1392.24	8
PLXDC1	1391.72	58
ZNHIT2	1391.2	22
FOXJ2	1390.77	42
CTD-2270P14.5	1390.14	28
ZADH2	1389.63	118
PCGF2	1389.63	64
LOC107984507	1389.56	60
CFL1	1388.98	97
CH17-118O6.6	1387.96	53
C16orf72	1387.78	95
SYT1	1385.5	40
EIF5	1384.18	45
DHTKD1	1383.88	40
TMEM199	1383.7	32
ARID2	1383.45	25
SMIM2-AS1	1381.38	10
HLF	1381.24	58
NFIA	1381	62
ITPKB	1379.62	70
FBN1	1379.37	55
CBX2	1379.11	38
ARL8A	1378.95	29
SIAH1	1377.53	77
LINC00612	1377.41	19
MBTPS1	1377.24	68
PDE8A	1375.76	50
LINGO1	1374.2	233
NBPF8	1373.48	56
DRGX	1371.96	90
RUNX3	1371.37	57
OPN3	1370.46	14
CDYL2	1369.23	48
TMEM240	1368.92	62
C17orf102	1368.25	53
MIR5188	1368.18	41
LINC02249	1367.47	100
C1QTNF4	1366.11	138
RABEP2	1365.84	36
NRIP3	1365.21	27
EML3	1364.95	61
PIAS1	1364.69	60
ANO7L1	1364.56	96
ADAMTS20	1364.16	37
C11orf45	1364.07	22
BUB1B	1363.13	12
MRPL21	1362.88	85
QSER1	1362.59	43
LINC00638	1361.59	176
C1QL1	1361.36	77
ITGA3	1361.25	39
TANC2	1360.72	36
CCDC102A	1360.45	65
LINC01356	1359.85	21
RPRML	1359.02	42
CSK	1358.25	41
SPECC1	1358.05	56
NDUFS8	1357.95	70
CGRRF1	1357.32	14
PTGER2	1356.33	42
KCNK4	1355.82	21
KCTD5	1355.5	47
CPNE8	1355.44	40
RPS6KB2	1355.09	13
MEGF11	1354.91	106
MOSMO	1354.53	30
ILF2	1354.47	21
TLE3	1352.7	32
KDM4A	1352.08	46
C1QL3	1351.64	38
KLHDC2	1349.52	15
NMRAL1	1348.12	85
LOC100288175	1347.82	62
MINPP1	1345.14	19
LINC02361	1344.78	90
INSYN1	1344.68	54
LBR	1344.39	77
APBB1IP	1344.32	56
PRDM4	1343.73	30
ZNF768	1341.08	39
TMEM170A	1340.16	18
EEF1G	1339.62	60
SOCS2	1339.32	55
TRABD2B	1338.31	105
DSC3	1337.92	42
PANK4	1337.83	125
MAP2K5	1337.72	127
MTMR9LP	1337.05	86
PLXNA2	1336.34	145
LOC105369391	1335.83	25
MIR615	1335.36	25
CDKN1C	1333.93	25
MIR129-2	1333.8	41
MRM1	1333.69	158
GSTO1	1333.3	37
FIGNL2	1333.18	65
LHX8	1332.35	65
CLN6	1331.62	54
PLEKHO2	1331.32	94
DUSP10	1331	42
CBX1	1330.9	67
FIGNL2-DT	1330.79	56
KNSTRN	1330.77	71
NDUFS5	1329.92	39
CAMKK1	1329.45	44
PADI6	1328.64	87
GAPDH	1328.57	24
DPAGT1	1328.43	76
USP31	1328.2	48
RASSF5	1327.86	42
ATP23	1327.63	118
ALOXE3	1327.55	35
ID3	1326.29	60
PDCD4-AS1	1326.01	35
GFER	1326	43
TMEM106C	1325.7	30
CDKN2C	1325.44	47
VPS29	1325.23	24
TSPAN14	1325.18	61
MIR1915	1323.7	28
NBEA	1323.47	45
COL9A2	1323.33	60
KIAA0754	1323.01	40
MRPS23	1322.74	57
CCDC15	1322.01	17
PHLPP2	1320.54	45
RASGEF1A	1319.95	146
TMC8	1319.95	72
CYB561	1319.81	85
BEAN1-AS1	1319.41	87
AKIRIN1	1319.19	23
IRS2	1318.78	117
SFXN4	1317.08	37
RHOU	1316.92	71
CDC16	1316.11	65
MAP3K9	1315.95	49
RGS10	1315.15	74
MICA	1313.81	208
VPS11	1313.19	52
NBPF1	1312.86	147
LOC101929657	1312.44	6
DUSP5	1312.27	73
GSC	1311.48	52
ARL16	1310.23	126
UVSSA	1309.96	458
PARS2	1309.76	37
NIBAN1	1308.79	25
HOXC4	1308.66	31
ARID4B	1308.63	6
AKAP10	1307.52	102
CENPBD1	1307.46	85
SLC25A28	1306.28	51
UNC5B-AS1	1306.09	51
KDM2B	1305.66	83
COLCA2	1305.6	29
TARBP2	1304.46	37
RMDN3	1304.23	17
SP1	1303.59	21
GOLGA6L5P	1303.19	113
ST8SIA2	1302.46	84
PPP1R13B	1302.4	34
ARHGEF19	1301.98	116
HOXC-AS2	1300.6	24
MLLT10	1300.2	19
DIP2C	1299.57	147
GTF3A	1299.25	96
TMEM72-AS1	1297.92	10
BNC1	1297.9	52
NBPF15	1296.4	92
GRIK4	1296.38	99
MCRS1	1295.49	25
BAG3	1294.96	49
HOXC-AS3	1294.58	9
KRTCAP2	1293.88	17
TMEM216	1293.86	16
TMOD3	1293.05	77
MORN3	1292.95	91
ZSCAN20	1292.77	90
ITPR2	1292.75	59
DEAF1	1292.61	112
ANKRD52	1292.45	19
TBC1D3L	1290.86	82
SEMA6D	1290.39	58
BROX	1289.71	1
NRXN2	1289.56	63
ELK3	1288.97	84
RNH1	1287.85	119
CTNS	1287.64	38
GJB2	1286.54	44
GAN	1284.99	30
FNDC3A	1284.48	37
ADAMTS17	1282.66	130
NDUFB1	1282.54	19
KCTD12	1282.33	45
TAGLN	1282.18	100
DTX4	1281.93	25
MPPED2	1281.38	57
CCDC59	1280.68	16
ARHGEF7-AS2	1280.59	28
RP11-109L13.1	1279.26	71
NEUROG3	1279.1	67
SAP18	1279	21
GTPBP4	1278.61	32
LINC00466	1278.61	34
SYT17	1277.74	43
PRIMA1	1277.57	123
ANPEP	1276.23	69
UNC13D	1275.56	152
KLF12	1275.5	58
TBX21	1275.03	57
PLPP3	1274.5	59
SF3B2	1274.16	41
SGMS1	1273.47	34
PITPNA	1273.02	78
RORA	1273.01	118
CTDNEP1	1271.73	87
SRR	1271.36	139
TADA1	1271.05	40
SLC41A1	1270.23	46
EIF5A	1270.21	69
DPEP2	1269.75	90
NPW	1269.31	26
ITPRIPL2	1268.81	37
TBX2	1268.08	39
FJX1	1267.81	36
SIDT2	1267.74	76
SPSB1	1267.4	129
RRN3P3	1267.35	13
APIP	1266.99	18
KAZALD1	1266.89	44
FAM43A	1265.81	62
PPP2R5C	1265.41	106
ELAC2	1265.23	55
DNM1P35	1265.16	19
SLFN13	1264.92	28
PFAS	1263.32	18
ZNF710	1263.04	39
HSD11B2	1261.73	35
POLR1D	1261.02	29
LHX9	1259.75	29
FOXJ3	1259.27	33
NPIPB12	1258	117
LOC100130987	1257.83	21
LOC100130370	1257.38	79
NFYB	1257.31	22
HOXB3	1257.2	157
RIN3	1256.96	142
FLJ13224	1256.84	22
SYT9	1256.77	31
C17orf107	1256.74	56
BTAF1	1256.7	17
WAPL	1256.58	55
MXRA8	1256.36	33
C16orf86	1255.93	94
TPI1	1255.76	17
EFCAB14	1255.67	62
HMOX2	1255.12	48
LOC780529	1254.54	46
ROM1	1254.51	19
UNG	1254.49	34
SBK1	1254.45	69
LINC01397	1254.39	20
CIAPIN1	1253.8	8
KMT2A	1253.34	37
NT5C3B	1252.3	50
TBK1	1252.17	33
SRP14	1252.14	30
LTBR	1251.81	61
IGF2	1251.25	75
ZNF500	1249.89	186
BMS1P4	1249.62	33
KL	1249.43	40
FOXO6	1248.88	74
PIP4K2B	1248.46	30
NUDT7	1248.4	31
MRC2	1247.42	61
EAPP	1247.32	38
SYT2	1246.66	97
ASIC2	1246.47	167
FAM216A	1245.62	98
RP11-273B20.1	1244.43	28
SIAH3	1244.13	41
SNAPIN	1243.12	48
POP5	1243.12	59
SLC35F3	1242.8	131
AKT1	1242.75	65
C2CD2L	1242.45	66
ROGDI	1242.38	100
YRDC	1241.87	30
LOC645485	1240.92	7
SH3PXD2A	1240.76	142
MDK	1240.08	37
VAMP2	1239.96	53
THEM4	1239.21	41
VPS18	1239.12	15
SMPD3	1238.88	45
PTPN6	1238.74	27
MKX-AS1	1238.13	50
LRRC56	1238.09	100
MTMR6	1236.48	28
TAL1	1235.51	40
EIF3J-DT	1233.07	8
JPT1	1232.12	14
A3GALT2	1231.16	83
ALX3	1230.62	40
OTUD7B	1230.07	19
NAGLU	1229.51	72
BATF3	1229.44	76
CLEC16A	1229.24	53
TMOD2	1228.9	62
ZBTB42	1228.41	30
ACVRL1	1227.71	37
CCNA1	1226.94	61
RNPEP	1225.95	18
PACS1	1225.83	62
CACUL1	1224.55	73
ALG10	1224.49	81
MRPS15	1224.48	35
LINC01750	1223.62	69
AMN	1223.49	110
LBX1-AS1	1222.75	40
PGAP6	1222.34	24
PAM16	1222.03	121
NEURL1	1221.97	28
ALG5	1221.7	20
CHP2	1221.26	30
PKNOX2-AS1	1220.46	69
CCDC177	1219.99	46
MIR1915HG	1218.92	38
SMARCE1	1218.76	35
TUBD1	1218.34	5
SLC6A17	1218.21	41
FRMD6-AS1	1217.97	9
SNUPN	1217.51	79
INPPL1	1217.09	24
DCAKD	1216.78	308
CELF2	1216.2	25
ELMSAN1	1215.56	37
ERO1B	1214.98	17
DDX21	1214.86	16
RRAS2	1214.18	65
MELK	1213.95	9
LINC01475	1213.64	48
WASF3	1213.37	71
PPL	1213.32	103
ANG	1213.09	35
HHIPL1	1212.72	30
PSMB5	1212.45	9
BEND5	1212.43	35
ARL2BP	1212.33	20
PPCS	1212.31	7
MLXIP	1212.21	40
FAM86C1	1212.12	44
GAA	1210.5	94
NOG	1210.43	101
ZNF668	1210.16	99
STAT5B	1210.06	20
RRM1	1209.7	46
RIN1	1208.53	104
MMP25-AS1	1207.81	59
FRAT1	1206.87	34
SETD1A	1206.78	23
MGMT	1205.18	164
SNTB2	1205.13	31
DOCK9-DT	1204.96	38
RAD9A	1204.13	58
ITPRIP	1204.02	26
DECR2	1203.98	63
KSR2	1202.65	91
IBA57	1201.93	105
PLK1	1201.72	17
RHOG	1200.55	27
DUSP8	1199.26	121
ANAPC11	1198.95	52
HS6ST3	1198.24	46
MIR3652	1198.23	6
HOXC13-AS	1197.51	20
PRPF40B	1197.42	46
RIPOR1	1195.74	51
ATE1	1195.63	41
ADORA2B	1193.96	49
UBTF	1192.62	32
PHLPP1	1191.07	65
MTSS2	1190.65	77
SDF4	1190.37	44
COMMD4P1	1190.19	22
TGIF1	1189.99	54
CDK5R1	1189.85	113
ZCCHC14	1187.43	88
FKBP2	1187.4	15
GUCY2D	1187.15	71
ERN1	1186.55	34
MIR3186	1186.3	155
IQGAP1	1186.24	61
MIR212	1185.47	25
CAPN2	1184.59	61
SPPL3	1184.27	29
ANO5	1183.66	51
BEST4	1183.01	13
BOLA2	1182.78	105
JAM3	1182.54	28
BICDL1	1180.81	41
LINC00115	1180.06	23
TSPOAP1-AS1	1179.85	61
MYF5	1179.75	8
MIR12121	1178.56	100
ZNF485	1177.06	7
SOX13	1176.72	46
SNX33	1176.47	68
SPATA5L1	1176.15	57
NMNAT1	1175.91	11
GNB1	1175.89	35
WSB2	1175.82	9
ARL5B	1175.45	53
OVOL1	1175.45	28
KLHL10	1175.39	2
TLCD4	1173.46	15
MARCHF9	1173.42	22
ALX4	1172.83	160
NPIPB6	1172.79	96
TAFA2	1172.58	33
COL1A1	1172.48	45
LINC02381	1172.08	50
YEATS4	1171.76	27
GLB1L3	1171.41	36
ST14	1171.31	94
POLR3C	1170.07	2
TMEM50A	1170.06	36
ANKRD63	1169.28	49
C16orf71	1168.95	16
GCGR	1168.86	52
B4GALNT3	1167.9	62
SHF	1167.88	59
SPATA1	1167.55	25
LRRC8C	1167.53	26
ZNF362	1167.51	90
CAPN5	1167.45	35
KLHL25	1166.85	20
GALNT9	1166.49	150
SLC25A22	1166.39	23
SRSF4	1166.18	21
HAUS4	1165.88	26
SLC25A15	1164.96	20
CLYBL	1164.9	28
CDAN1	1164.61	40
FLYWCH2	1164.4	75
CHSY1	1164.08	157
MIR3181	1163.97	11
SPINDOC	1163.94	29
SULT1A1	1163.16	60
ODR4	1163.12	6
SCAPER	1162.44	65
DENND4B	1161.74	34
GPR153	1160.43	74
LINC01569	1160.3	61
FOXL1	1160.03	68
MMD	1159.99	43
NPEPPSP1	1159.75	32
TSPAN18	1159.33	100
CD63	1159.14	26
CERS2	1158.9	27
NFATC2IP	1158.88	33
SOX21	1158.73	20
S100PBP	1158.37	63
PA2G4	1157.99	14
NGF	1157.7	44
ZFP57	1157.15	510
ATP1B2	1157.14	25
VANGL2	1156.84	25
YPEL2	1156.65	32
WASHC2C	1156.43	143
BET1L	1155.34	57
MAPK3	1155.24	106
NELL2	1155.13	56
USP1	1155.07	18
B3GNTL1	1154.74	102
ADAMTS7	1153.46	69
ATL3	1153.01	76
WNT5B	1152.88	42
FBXL15	1152.87	21
SMURF2	1152.27	37
LITAF	1152.25	54
RNF207	1152.21	57
FAHD1	1152.1	76
TRAF3IP3	1151.96	52
NDRG4	1151.64	29
FAM43B	1151.36	34
DICER1	1150.36	101
HAGHL	1150.17	77
CRCP	1149.79	222
PALD1	1149.44	63
DNAJC1	1148.61	25
FZD10-AS1	1148.1	68
PLCG2	1147.91	77
C1orf229	1147.6	58
MTHFSD	1147.45	98
TRIM27	1147.24	195
HLX	1147.15	31
RAN	1147.05	20
HEATR5A	1147.01	15
ANKRD40	1146.07	33
FOS	1145.27	47
FRAT2	1144.96	59
ADO	1144.23	46
CDH15	1143.66	49
FBXO34	1143.28	33
MIR196A1	1142.98	51
MYL12B	1142.67	46
GLIS2-AS1	1142.63	29
BNIP3	1142.56	59
NEK7	1142.5	35
CCND2	1142.47	108
BRI3BP	1142.07	27
ZDHHC22	1141.98	47
PAFAH1B1	1141.54	43
SPTLC2	1140.43	52
SYT11	1138.91	21
HSDL1	1137.07	64
ATAD3B	1136.16	167
FNBP1L	1135.33	16
IKZF3	1135.18	35
FARP1	1133.99	54
DLGAP3	1133.69	56
RILP	1133.67	22
LUZP1	1133.67	37
IGSF8	1133.46	29
ARRDC4	1132.97	43
H3-3B	1132.75	16
GPR89A	1132.55	18
EEF2K	1131.89	41
DEDD	1130.73	11
CLEC14A	1128.92	19
ADAMTS8	1128.54	64
SLC2A4	1128.5	27
NCDN	1128.3	15
WASH7P	1128.26	24
LCMT1-AS1	1127.8	17
LY6G5B	1127.51	504
MARK2	1126.72	41
SEPHS1	1126.66	40
ALDH1A2	1125.84	37
SLC12A7	1125.69	198
SCYL3	1125.56	30
CPLX3	1124.93	68
CTDSPL2	1124.39	12
HYKK	1123.81	19
TMEM52	1123.67	106
H2AX	1123.32	22
KIAA1522	1122.11	67
MLNR	1121.19	34
MTHFR	1120.77	71
STARD9	1119.96	27
ZDHHC18	1119.92	68
USP36	1119.78	50
MED17	1118.4	22
EPS8	1118.08	28
MDGA2	1117.5	51
TEAD1	1117.15	103
IPO4	1116.72	20
CSNK2A2	1116.62	18
LRP4	1116.54	40
DLX3	1116.46	44
TBC1D12	1116.03	27
THAP12	1115.72	51
SLC25A29	1115.25	69
OTX2-AS1	1115.1	64
FGFR1OP2	1113.85	2
CABP1	1113.41	40
CASP9	1111.35	45
RLF	1111.01	26
MFAP2	1110.95	49
CCDC85C	1110.54	99
DCTPP1	1110.25	5
VAMP3	1110.21	50
HVCN1	1110	82
L3HYPDH	1109.68	52
CD9	1109.14	74
LNX2	1107.64	16
DRAXIN	1107.45	46
FUT8	1107.34	28
NES	1106.71	31
CATSPERZ	1106.46	27
HOXB7	1105.55	28
HID1	1104.83	22
RP5-1021I20.1	1103.91	95
NCR3LG1	1103.79	18
C12orf10	1103.73	12
NUDT13	1103.53	85
KCNA2	1102.33	52
JPH3	1102.31	69
NPIPA2	1101.05	139
OPRD1	1101.02	56
PGM1	1100.5	27
CYP46A1	1100.07	97
NUTM2A-AS1	1099.68	40
PRRC2C	1097.01	16
YWHAE	1096.92	50
SLC2A13	1096.4	26
SLC6A4	1096.23	34
MRPS31	1095.6	15
DHRS12	1095.5	10
ZBTB8B	1095.48	33
MAP1LC3B	1095.21	54
MARCHF8	1094.13	14
LDLRAD4	1093.24	151
GJC1	1093.21	19
MLF2	1092.5	33
MAP7D1	1092.49	73
SALL3	1092.37	282
AK4	1092.36	36
ADGRB2	1092.3	17
PSEN1	1091.84	110
DDX59-AS1	1091.28	26
BRINP2	1090.63	37
BAD	1090.29	5
ELOA	1089.96	52
B3GAT1	1089.81	106
RXRA	1089.8	363
P3H4	1089.37	26
PLK3	1089.03	25
DCST1-AS1	1088.73	45
SLIT1	1087.52	86
SOX8	1087.45	141
DBNDD1	1087.4	90
KSR1	1087.25	124
B3GNT9	1086.5	82
LOC101929457	1086.49	64
ALOX15	1085.41	35
MACF1	1085.1	64
NCOR1	1085.04	28
POLR2L	1084.74	59
TMEM116	1084.27	52
MYOD1	1084.11	37
HPS1	1083.46	23
PROX1	1082.65	48
PPP1R3E	1082.36	24
SETD9	1081.99	50
DHH	1081	36
SLITRK1	1080.73	43
UBE2L6	1080.52	17
POLE	1080.11	34
CHMP4A	1080.05	9
SSU72	1078.96	121
SCCPDH	1078.51	56
LINC00909	1077.96	26
CYTH1	1077.83	92
CUEDC1	1077.44	76
TMEM179	1077.23	58
SLC7A5P2	1077.21	56
ZFP90	1076.62	86
KIF11	1075.73	16
SLC22A18AS	1074.31	22
ZSWIM5	1073.86	34
GPR158-AS1	1073.11	31
ITGAX	1073.1	40
B4GALNT1	1072.87	31
RP11-326C3.16	1072.63	31
ACADVL	1072.57	77
GPRIN2	1072.53	50
ITPKB-IT1	1072.39	89
RNF41	1070.84	8
TNK2	1070.58	115
NTF3	1070.28	101
BANF1	1069.79	50
MICU2	1069.77	24
LINC02255	1069.34	31
SDC3	1069.15	69
KCNMB4	1068.96	39
SLC7A1	1068.91	25
FAM110D	1068.68	54
MGAT4FP	1068.34	10
LINC02352	1068.08	26
ARL1	1067.92	15
CHMP6	1067.6	90
PIP4K2A	1067.57	79
BMP8A	1067.3	52
MGC12916	1067.09	54
AATF	1067.01	20
PROX1-AS1	1066.59	27
LINC01977	1066.39	58
FADD	1066.36	102
SCAMP2	1066.3	115
HMGB1	1065.6	47
YBX2	1065.42	50
ATP8A2	1065.03	78
FCHSD2	1064.92	39
PPFIA1	1064.62	61
HOXC11	1064.41	13
OSBP	1063.56	17
PAGR1	1062.89	19
NRG3	1062.73	9
TM2D3	1062.37	36
MIR4738	1061.25	2
SOCS1	1061.22	112
MIB2	1061.03	63
LINC00637	1060.95	67
MED13L	1060.5	31
SERTAD4-AS1	1060.47	43
ZBTB16	1060.42	67
IPO13	1060.42	42
CHST14	1059.85	56
OTUD1	1059.75	61
MIR3615	1058.79	12
ABCA3	1058.55	31
IDE	1058.49	18
LRRC4C	1058.47	26
FAAP20	1057.91	170
DBX1	1057.35	76
MPP2	1056.94	69
RYR2	1056.44	80
MIR3649	1056.31	28
SMG1P3	1055.81	20
GAS7	1055.6	167
CSRP1	1055.51	8
FZD2	1055.02	45
MMEL1	1054.81	226
MYBPC3	1054.63	166
DDX12P	1054.51	62
UQCRC2	1054.41	18
SCNN1G	1054.12	39
TMEM132C	1053.79	46
EP400P1	1053.36	58
EHBP1L1	1053.12	62
POLR2M	1053.05	26
TUBA1C	1052.77	59
SNORD3D	1052.33	25
BORCS6	1052.24	25
PELI2	1052.09	57
NEDD1	1051.81	28
CLK3	1051.35	65
ABHD17C	1050.99	42
CDCA5	1050.71	8
ESRRA	1050.56	22
MFSD14A	1050.13	17
MCL1	1049.6	22
TCTN3	1049.57	37
PPP1R12A	1049.11	19
SMPD2	1048.79	75
SERPINF1	1048.77	63
LINC00467	1048.5	25
LIMK1	1048.42	80
CCDC88C	1047.67	123
ANK3	1047.08	58
RAB42	1046.8	15
LINC01465	1046.45	16
TAF1C	1046.14	35
IFITM4P	1045.64	389
LIG3	1045.51	68
NEO1	1045.46	53
ZNF592	1045.34	68
TTC39A	1044.72	25
RBM20	1044.47	59
CABLES1	1044.44	71
LPCAT3	1043.9	17
LINC01586	1043.38	18
RASSF10	1043.35	39
ATXN1L	1043.24	19
LOC100129697	1043.1	94
MCOLN3	1042.9	28
C1orf21	1042.42	46
RP11-1070N10.3	1042.38	30
MAFG	1041.44	33
CFAP20	1041.36	40
MEDAG	1040.77	22
WNT2B	1040.66	44
GRB7	1040.48	47
STIP1	1039.89	14
EGLN2	1039.34	95
TMEM86A	1039.27	26
DDX51	1038.87	54
ACOT1	1038.55	109
EIF3J	1038.53	13
PPP1R1B	1038.35	47
HCN4	1037.34	89
PTPMT1	1036.98	37
RHBDF2	1036.78	74
GAD2	1036.66	72
OAT	1036	30
ABHD11-AS1	1035.47	69
AP5B1	1035.25	41
ZNF641	1035.15	66
YBX1	1034.57	25
ATP5F1C	1034.21	5
TALDO1	1033.95	49
MICALL2	1033.07	393
UTF1	1032.4	121
ZMYND15	1031.81	32
P3H3	1031.2	27
PPM1H	1030.62	54
SLC15A1	1030.13	65
BIRC2	1029.74	19
ZC3H7A	1029.13	28
LOC441666	1028.56	59
WDR45B	1028.29	84
THAP11	1028.13	24
CRHR1	1028.04	66
EMX2	1027.89	83
HPS6	1027.62	42
ADAP1	1027.28	388
GGNBP2	1027.2	50
CNTNAP1	1027.02	34
TSEN54	1026.78	28
CARHSP1	1026.69	71
CTSW	1026.52	140
ATE1-AS1	1025.62	25
CHRM3	1025.61	63
CEP192	1024.62	72
LINC02609	1023.96	33
GPRC5B	1023.61	80
LUC7L	1023.42	9
IFITM10	1023.11	123
LINC00605	1022.6	75
SLC25A21-AS1	1022.37	52
GPR3	1021.99	40
ATOH7	1021.36	28
CTXND1	1021.27	33
BCDIN3D	1020.84	28
DRAM1	1020.4	32
LOC102723373	1020.15	12
TSPAN4	1019.4	102
NKX2-1	1019.3	29
RASAL1	1018.95	65
ITGA11	1018.86	54
NCBP3	1018.17	35
C1QL4	1017.35	31
CIB2	1017.24	21
SIRT1	1017.07	43
CHRNE	1016.79	46
GRIK3	1016.61	195
GDPD5	1015.61	103
RP11-218M22.1	1015.6	35
ABHD15	1015.35	43
RUNDC3A-AS1	1013.28	13
LAMTOR5-AS1	1012.76	6
ATG101	1012.37	23
LINC02256	1010.84	24
STK38L	1010.81	19
PCNX3	1010.33	32
LCOR	1010.2	17
LOC100287837	1009.98	24
TMEM79	1009.9	32
CARMIL3	1009.84	52
ADCYAP1	1009.69	52
ADAMTS15	1009.46	68
DYNLRB2	1009.44	49
KPNA3	1008.83	26
GDF11	1008.79	21
LOC101929479	1008.63	58
TIMP2	1008.15	100
CDC42BPB	1008.13	55
CHD8	1007.82	14
DDX19B	1007.61	19
SNAPC2	1007.51	22
CERK	1007.42	91
MTERF2	1006.53	9
CLMP	1005.65	58
AK5	1005.56	47
RMST	1005.35	34
LINC02298	1005.19	49
ZNF785	1005.07	13
PMP22	1004.63	16
LRRC43	1004.3	106
WDR11	1004.24	76
PHC1	1003.88	21
WASHC3	1003.73	36
NKX1-2	1003.55	40
ATP1B1	1003.42	31
RIC8A	1003.37	42
OSBPL7	1003.07	63
APPL2	1002.62	38
INSYN2A	1002.29	82
LOC105378269	1001.67	31
TP53I3	1001.62	84
KLF5	1001.14	42
IQSEC3	1000.92	96
ARNT2	1000.47	54
MTFR1L	999.753	25
NUDT14	999.385	126
ULK3	999.288	87
CWF19L2	999.189	34
SLC48A1	998.71	55
UNCX	998.349	474
BMS1P21	997.902	21
CHD5	997.513	110
UTS2R	996.76	74
RNF152	996.705	53
B3GALT6	996.63	77
TTC9	996.525	38
DDX19A	996.489	30
LOC100130992	996.392	27
RHOF	996.161	67
HACD3	995.916	29
MTG1	995.799	57
RALGPS2	995.75	24
SESN3	995.524	38
LOC728739	995.507	65
BSX	995.494	46
C11orf91	995.336	76
TGFB2-AS1	995.193	22
USP30	994.751	22
PAX8-AS1	994.113	149
HLA-DRB5	994.055	285
LOC105369332	993.937	8
CCL22	993.811	8
DUT	993.635	45
TLCD3A	993.457	22
CCDC85B	992.851	25
SQOR	992.693	22
COQ8A	992.502	68
OSGIN1	992.061	58
G2E3	991.67	27
SMAGP	991.361	25
GTF2F2	991.354	10
LINC02288	991.189	19
RNVU1-17	991.161	87
INPP5A	990.932	184
CYBA	990.662	56
WNT11	990.206	166
ANKS3	990.02	19
HIP1R	989.962	24
TTC6	989.61	61
SLC7A6OS	989.424	26
SS18	989.409	37
PSEN2	989.121	47
KCNQ1	989.004	156
KPNB1	988.75	28
PPIEL	988.132	47
HES5	987.799	52
SRRM4	987.131	55
LDB1	987.059	30
PRDM2	986.94	101
LMNTD2-AS1	986.593	51
CLUHP3	985.825	40
PRKCE	985.769	104
TEN1	985.336	64
LRR1	985.208	43
LINC01342	984.62	124
TNFSF11	984.564	25
FCSK	984.545	35
SMCO4	984.359	55
EFL1P1	984.148	37
CA10	984.004	47
METTL2A	983.951	22
HOOK1	983.032	25
RHBDF1	982.844	27
HLA-A	982.071	195
TNS2	981.796	44
GSDMB	981.512	105
PANK1	981.441	10
LOC403312	980.767	92
CSAD	980.658	28
GPC6	979.414	39
BTBD11	978.98	121
LINC00623	978.351	83
MYBBP1A	978.054	85
LDLRAP1	977.912	87
LINC01703	977.775	43
MIR193BHG	977.714	35
TRAF4	976.381	37
EMP2	975.692	49
FGF4	975.592	81
LOC112268124	975.398	17
RHOC	975.001	24
GPR135	974.98	59
MIR4740	974.48	59
RPS2	974.441	70
LOC101929384	974.22	42
PSORS1C3	974.083	307
UBE2D1	973.909	25
PDZRN4	973.594	59
IRF8	973.446	35
SYT6	973.102	49
NDUFB8	972.963	52
PLCH2	972.52	257
NOB1	972.201	14
TMPO-AS1	971.938	16
LSP1	971.85	93
FAM111B	971.689	8
CRLF3	971.496	104
LUNAR1	970.931	37
ZFPL1	970.831	6
LRRC1	970.816	52
ABHD12B	970.708	15
CACNG4	970.492	95
LATS2	969.919	60
C4A	969.269	452
NOTCH2	969.138	30
SLC26A10	968.8	35
PKD1P6	968.704	79
HCP5B	968.664	443
VARS2	967.78	426
PSD	967.619	67
PRPH	967.526	30
PIGK	967.403	9
E2F8	967.009	33
MIR4521	966.159	14
FLVCR1-AS1	966.156	37
MAFTRR	965.544	44
HBQ1	965.465	27
SPAG5	965.422	6
ENTPD7	965.091	8
ST3GAL2	964.808	45
WBP2	964.665	37
ALKBH5	964.106	93
SUPT20H	964.073	13
C10orf143	964.048	17
EPB41L3	963.933	80
COQ5	963.924	36
TERF2IP	963.191	16
ZNF276	963.081	64
RNF187	962.958	38
LOC105369632	962.723	4
IPP	962.613	16
FLVCR2	961.355	38
TRIM58	961.149	38
SART1	961.111	30
NT5DC3	960.799	43
KIAA0753	960.732	65
LRRK1	960.187	101
ITGA8	960.022	36
SCD	959.619	27
CORO2B	959.617	116
CCDC137	959.558	63
CDC20	959.076	19
FMNL1	958.186	31
SH3GL3	957.57	23
TGFB3	957.533	39
TPRG1L	957.012	38
MDGA1	956.593	175
FURIN	956.513	79
SYDE2	955.781	22
TRIM62	955.671	39
TMEM123	954.947	10
LOC101927318	954.778	12
YPEL3	954.638	135
GNB5	954.629	31
HEATR6	954.432	53
ADM	954.275	27
ZC3H12C	954.065	66
SPRYD4	953.861	29
RP4-756H11.3	953.827	249
DYNC1H1	953.649	71
PPP1R13L	953.572	45
LOC105371328	953.489	28
MESP1	953.446	38
LSM10	953.142	22
TMEM45B	952.741	33
SMYD2	952.733	65
HBZ	952.575	118
CRIPAK	952.386	294
RWDD3	951.773	33
CASKIN2	951.738	109
CCDC184	951.172	24
LPGAT1	950.933	20
CCNB2	950.189	13
RABIF	949.745	13
TEAD4	949.611	42
SMIM12	949.261	28
CWC25	948.977	7
ARRB2	948.752	40
ATP6V0A2	948.121	67
PER1	947.896	29
TMEM92	946.376	49
VWA2	946.208	52
EXOC8	946.178	27
MYO5B	946.01	53
APH1A	945.729	8
ZW10	945.493	7
FGFBP3	945.439	27
ONECUT3	945.407	226
C1orf122	945.135	8
APH1B	945.047	29
SMAD7	945.005	142
IDH3A	944.757	27
DOC2GP	944.604	77
CAPN1	944.443	40
RAVER2	943.941	40
HES2	943.843	31
2012-09-01	943.312	82
PABPN1	942.998	19
AHNAK	941.47	53
AGMAT	941.089	23
TMTC1	940.865	36
INA	940.583	25
PKD2L1	940.576	39
SMG5	940.389	52
RGS7	940.174	29
THBS1	939.784	44
ARHGDIG	939.331	29
SCYL2	939.232	13
DENND2B	938.827	37
SSTR2	938.701	30
S100A10	938.397	26
VTI1B	938.31	20
CPXM2	938.268	111
MTMR10	937.891	51
LOC105371824	937.794	23
TBC1D24	937.287	97
HS3ST2	936.498	107
PM20D1	936.022	50
PRKCZ	935.813	166
ADPRM	935.636	10
PRR35	935.311	59
MRTFB	935.245	10
LRIG3	935.072	30
MGST3	934.987	49
ATN1	934.809	28
RABAC1	934.731	100
DBX2	934.54	20
ELOVL3	934.461	39
RP11-156P1.3	934.441	48
CFAP46	934.399	156
HBA2	934.263	28
WSCD1	934.167	153
INTS1	933.627	168
ATF7	933.179	3
AKAP1	933.127	51
C1orf198	933.082	36
C17orf64	932.988	22
TAF6L	932.821	12
WT1	932.792	72
ACTN2	932.428	21
SIRT3	932.211	41
LINC00643	931.625	23
LINC00963	931.611	277
PDZD8	931.476	55
SECTM1	931.472	136
HOXC10	931.283	18
PPP1R18	930.845	63
COQ6	930.645	40
SYNGR2	930.354	49
SLC6A2	929.968	38
ZBTB18	929.727	66
MIR3180-4	929.698	62
TNFRSF1B	929.497	22
CHST3	928.978	67
GSTM3	928.81	44
SIX6	927.743	41
LPAR3	927.689	42
KCNK3	927.235	47
PUSL1	926.906	53
PPM1E	926.559	27
EP400NL	926.122	51
ESRRG	926.112	32
SYNE2	925.914	59
VAT1	925.516	63
KLHL35	925.406	67
DENND5A	925.267	24
GRTP1	925.218	41
TOR3A	925.213	91
CNST	924.866	27
RTRAF	924.617	19
SLC3A2	924.537	20
CREBBP	924.111	66
TRMT61A	924.068	183
GPN2	923.949	12
B3GNT4	923.693	35
PPP1R16A	923.223	130
NIPA1	923.196	33
NFATC1	922.735	63
CTBP2	922.619	136
ZYG11B	922.618	26
ZNF598	922.328	31
ZNF18	921.955	14
SEC23A-AS1	921.67	8
CHKA	921.532	51
PLEKHO1	921.393	26
TTLL5	921.237	30
UBE2Q2P2	921.047	74
TM7SF2	920.748	37
APLNR	920.502	26
GGACT	919.963	47
HTRA1	919.61	72
AP4S1	919.112	22
PPP4R4	918.894	13
SDR39U1	918.455	23
SSTR5	918.408	230
CR2	917.257	28
UGGT2	917.235	48
PFKP	917.2	34
CYP21A1P	916.983	467
GPR89B	915.858	13
SUDS3	915.809	36
PRKAR1A	915.789	34
SPRED1	915.561	31
COPG2	915.513	47
RSL1D1	915.448	13
AGAP11	915.087	28
NDUFB10	915.085	47
MRPL23	914.474	55
DEGS2	914.112	87
SENP3	913.938	15
PRCC	913.843	20
ETV6	913.787	100
EVL	913.524	76
RIPK3	912.98	33
RAP1GAP2	912.844	32
COX10	912.631	13
CORO1B	912.582	20
SLC15A4	912.498	101
RPS23	912.27	26
RP1-178F15.4	911.946	29
EIF4EBP2	911.365	16
PAWR	910.844	35
NID2	910.817	47
ANXA11	910.812	43
SMTNL2	910.765	44
UBE2Q2	910.628	17
SPSB3	910.348	26
HLA-H	910.145	424
PRMT8	909.804	50
SLC9A3-AS1	909.675	378
CRTAC1	909.661	96
GLI1	909.56	28
WASH2P	909.024	189
SLC2A1-AS1	909.005	75
MT1L	908.737	11
TSPAN32	908.465	43
DGKZ	908.002	58
FAM66C	906.904	16
IFT140	906.889	78
CASP16P	906.76	59
[truncated: 22,859 more rows]

## Sheet: Supplemental Table S3
Tables of top5 specific and top5 annotated markers by lineage
lineage	gene	p_val	avg_log2FC	pct.1	pct.2	p_val_adj	score	in_clusters	Description	markers_of	top5specific	top5annotated		abbreviations :	LT-HSC : Long Term Hematopoietic Stem Cells
B cell	IGHM	2.16294e-151	14.9392	0.996	0.301	6.48881e-148	4.5	B cell	immunoglobulin heavy constant mu	B cell	TRUE	TRUE			HSC : short term Hematopoietic Stem Cells
B cell	CD37	6.41829e-140	10.2723	0.991	0.418	1.92549e-136	4.5	B cell	CD37 molecule	B cell	TRUE	TRUE			MPP : MultiPotent Progenitors
B cell	IGHD	4.58313e-113	8.45535	0.881	0.187	1.37494e-109	4.5	B cell	immunoglobulin heavy constant delta		TRUE	FALSE			LMPP : lymphoid-primed multipotent progenitors
B cell	C16orf74	6.1396e-113	7.65583	0.881	0.167	1.84188e-109	4.5	B cell	chromosome 16 open reading frame 74		TRUE	FALSE			CLP : Common Lymphoid Progenitors
B cell	GTDC1	2.70735e-101	8.73614	0.868	0.239	8.12204e-98	4.5	B cell	glycosyltransferase like domain containing 1		TRUE	FALSE			proB : pro-B cells
B cell	LTB	2.023e-133	4.66057	0.97	0.231	6.069e-130	4	B cell, Lymphoid, T cell	lymphotoxin beta	Ly	FALSE	TRUE			MPP-Ery: Erythroid-primed multipotent progenitors
B cell	CD83	1.26099e-119	6.67581	0.915	0.198	3.78298e-116	4	B cell, DC, 18	CD83 molecule	DC|B cell	FALSE	TRUE			EMP : “erythro-myeloid” progenitors giving erythroid and Basophil/Eosinophil/Mastocytes cells (see Zheng et al, Molecular Systems Biology, 2018)
B cell	CD52	1.63783e-91	4.33257	0.915	0.411	4.9135e-88	4	B cell, Lymphoid, DC, T cell	CD52 molecule	Ly|HSC|MPP|LMPP	FALSE	TRUE			Mk : Megakaryocytes
DC	CTSS	8.55739e-45	19.0286	1	0.313	2.56722e-41	4.5	DC	cathepsin S		TRUE	FALSE			Er : Erythroblast
DC	FTL	1.49124e-44	16.1359	1	0.451	4.47371e-41	4.5	DC	ferritin light chain		TRUE	FALSE			Mas : Mastocytes
DC	PSAP	3.99124e-44	13.6242	1	0.322	1.19737e-40	4.5	DC	prosaposin		TRUE	FALSE			GMP : Granulocytes and Macrophages Progenitors
DC	FCER1G	6.19688e-44	11.3496	0.985	0.198	1.85907e-40	4.5	DC	Fc fragment of IgE receptor Ig		TRUE	FALSE			Mo : Monocytes
DC	TYROBP	6.8719e-44	11.3842	0.985	0.173	2.06157e-40	4.5	DC	transmembrane immune signaling adaptor TYROBP		TRUE	FALSE			Neu : Neutrophil
DC	CST3	1.35316e-43	8.63164	0.985	0.275	4.05949e-40	4.5	DC	cystatin C	DC|Mo-CD4+	FALSE	TRUE			DC : Dendritic cells
DC	S100A4	5.53234e-43	12.8684	0.985	0.399	1.6597e-39	4.5	DC	S100 calcium binding protein A4	T cell CD4 nv	FALSE	TRUE
DC	LYZ	1.09073e-44	9.48187	1	0.202	3.2722e-41	4	Myeloid, DC	lysozyme	Neu|Mo|Neu2	FALSE	TRUE
DC	CXCL8	8.35288e-36	6.36487	0.955	0.224	2.50586e-32	4	HSC, DC, LT-HSC, 18	C-X-C motif chemokine ligand 8	Neu	FALSE	TRUE
DC	CD83	7.66019e-35	6.62749	0.909	0.206	2.29806e-31	4	B cell, DC, 18	CD83 molecule	DC|B cell	FALSE	TRUE
Erythro-Mas	CNRIP1	0	9.95095	0.801	0.119	0	4.5	Erythro-Mas	cannabinoid receptor interacting protein 1		TRUE	FALSE
Erythro-Mas	GATA1	0	9.5141	0.714	0.138	0	4.5	Erythro-Mas	GATA binding protein 1	MEP|EMP	TRUE	TRUE
Erythro-Mas	GATA2	0	3.06896	0.786	0.283	0	4.5	Erythro-Mas	GATA binding protein 2	EMP|ErP|Mas	TRUE	TRUE
Erythro-Mas	H2AFZ	0	4.88744	0.786	0.313	0	4.5	Erythro-Mas			TRUE	FALSE
Erythro-Mas	PCLAF	0	8.5123	0.681	0.199	0	4.5	Erythro-Mas	PCNA clamp associated factor		TRUE	FALSE
Erythro-Mas	FCER1A	1.05695e-177	4.5336	0.604	0.113	3.17084e-174	4.5	Erythro-Mas	Fc fragment of IgE receptor Ia	DC|Eo	FALSE	TRUE
Erythro-Mas	KLF1	8.33983e-128	11.4175	0.566	0.118	2.50195e-124	3.5	Erythro-Mas	Kruppel like factor 1	MEP	FALSE	TRUE
HSC	AVP	0	2.70469	0.573	0.25	0	3.5	HSC	arginine vasopressin	HSC	TRUE	TRUE
HSC	MAFF	0	4.80337	0.655	0.286	0	3.5	HSC	MAF bZIP transcription factor F		TRUE	FALSE
HSC	ZFP36	1.08099e-245	5.5976	0.609	0.33	3.24298e-242	3.5	HSC	ZFP36 ring finger protein	HSC	TRUE	TRUE
HSC	CRHBP	3.384e-187	2.21503	0.563	0.323	1.0152e-183	3.5	HSC	corticotropin releasing hormone binding protein		TRUE	FALSE
HSC	BEX1	4.6585e-129	2.30005	0.383	0.191	1.39755e-125	3.5	HSC	brain expressed X-linked 1		TRUE	FALSE
HSC	KLF2	0	4.79156	0.602	0.227	0	3	HSC, 18	Kruppel like factor 2	T cell|ErP|proT	FALSE	TRUE
HSC	TSC22D3	7.86642e-221	1.86857	0.54	0.307	2.35992e-217	3	HSC, B cell, Lymphoid	TSC22 domain family member 3	T cell|Mac	FALSE	TRUE
HSC	MLLT3	3.4148e-116	0.813068	0.559	0.371	1.02444e-112	3	MPP/LMPP, HSC	MLLT3 super elongation complex subunit	HSC|MPP|MPP-cycle	FALSE	TRUE
LT-HSC	SPP1	6.24185e-37	2.24472	0.678	0.142	1.87255e-33	4.5	LT-HSC	secreted phosphoprotein 1		TRUE	FALSE
LT-HSC	SCN1B	1.25177e-27	4.07598	0.678	0.168	3.7553e-24	4.5	LT-HSC	sodium voltage-gated channel beta subunit 1		TRUE	FALSE
LT-HSC	FGFR1	2.73348e-25	1.09721	0.655	0.18	8.20045e-22	4.5	LT-HSC	fibroblast growth factor receptor 1		TRUE	FALSE
LT-HSC	ID3	1.62005e-112	6.3024	1	0.216	4.86016e-109	4	B cell, LT-HSC, T cell, 18	inhibitor of DNA binding 3, HLH protein		TRUE	FALSE
LT-HSC	ID1	3.35138e-108	6.55642	0.983	0.205	1.00541e-104	4	LT-HSC, T cell, 18	inhibitor of DNA binding 1, HLH protein	LT-HSC	TRUE	TRUE
Lymphoid	ACY3	1.00013e-191	6.7426	0.666	0.118	3.0004e-188	4.5	Lymphoid	aminoacylase 3		TRUE	FALSE
Lymphoid	KIAA0087	1.58905e-104	10.4926	0.611	0.141	4.76716e-101	4.5	Lymphoid	KIAA0087 lncRNA		TRUE	FALSE
Lymphoid	TMSB4X	1.04347e-240	2.54096	0.839	0.367	3.1304e-237	4	Lymphoid, DC, T cell, Mk/Er	thymosin beta 4 X-linked		TRUE	FALSE
Lymphoid	LTB	1.96044e-208	4.49179	0.769	0.21	5.88132e-205	4	B cell, Lymphoid, T cell	lymphotoxin beta	Ly	TRUE	TRUE
Lymphoid	JCHAIN	1.97673e-101	8.65311	0.595	0.084	5.9302e-98	4	B cell, Lymphoid	joining chain of multimeric IgA and IgM	B cell|pDC	TRUE	TRUE
Lymphoid	CD99	9.0831e-189	5.73237	0.808	0.367	2.72493e-185	3.5	Lymphoid	CD99 molecule (Xg blood group)	LMPP	FALSE	TRUE
Lymphoid	NKG7	1.00447e-79	3.60871	0.502	0.206	3.0134e-76	3.5	Lymphoid	natural killer cell granule protein 7	NK	FALSE	TRUE
MPP/LMPP	RPL39	7.12342e-222	0.685263	0.544	0.347	2.13703e-218	4	MPP/LMPP	ribosomal protein L39		TRUE	FALSE
MPP/LMPP	RPL34	6.65389e-201	0.736601	0.556	0.365	1.99617e-197	4	MPP/LMPP	ribosomal protein L34		TRUE	FALSE
MPP/LMPP	SAP30	5.49867e-127	1.55645	0.165	0.339	1.6496e-123	4	MPP/LMPP	Sin3A associated protein 30		TRUE	FALSE
MPP/LMPP	KPNA2	1.18559e-110	4.91897	0.257	0.415	3.55678e-107	4	MPP/LMPP	karyopherin subunit alpha 2		TRUE	FALSE
MPP/LMPP	NPR3	7.06062e-84	1.42433	0.469	0.297	2.11819e-80	4	MPP/LMPP	natriuretic peptide receptor 3		TRUE	FALSE
MPP/LMPP	PROM1	5.73218e-44	2.22312	0.334	0.222	1.71965e-40	3	MPP/LMPP	prominin 1	HSC|MPP|MPP-cycle	FALSE	TRUE
MPP/LMPP	CDK6	7.61754e-22	1.05695	0.454	0.385	2.28526e-18	3	MPP/LMPP	cyclin dependent kinase 6	MPP|MEP|CMP|GMP	FALSE	TRUE
MPP/LMPP	MLLT3	7.8926e-69	0.749774	0.491	0.353	2.36778e-65	2	MPP/LMPP, HSC	MLLT3 super elongation complex subunit	HSC|MPP|MPP-cycle	FALSE	TRUE
MPP/LMPP	SELL	1.48454e-64	0.571021	0.475	0.354	4.45363e-61	2	MPP/LMPP	selectin L	LMPP	FALSE	TRUE
Mk/Er	RAP1B	3.88863e-25	16.234	1	0.374	1.16659e-21	4.5	Mk/Er	RAP1B, member of RAS oncogene family		TRUE	FALSE
Mk/Er	FERMT3	5.10696e-25	15.0248	1	0.347	1.53209e-21	4.5	Mk/Er	fermitin family member 3		TRUE	FALSE
Mk/Er	MYL12A	6.19245e-24	15.6647	1	0.467	1.85774e-20	4.5	Mk/Er	myosin light chain 12A		TRUE	FALSE
Mk/Er	DAAM1	9.19552e-24	10.356	1	0.226	2.75866e-20	4.5	Mk/Er	dishevelled associated activator of morphogenesis 1		TRUE	FALSE
Mk/Er	RAB27B	1.11915e-23	11.0764	0.972	0.206	3.35745e-20	4.5	Mk/Er	RAB27B, member RAS oncogene family		TRUE	FALSE
Mk/Er	PLEK	4.81148e-24	11.8924	0.972	0.249	1.44345e-20	4	DC, Mk/Er	pleckstrin	Mk	FALSE	TRUE
Mk/Er	HBD	3.05448e-21	5.64102	0.917	0.236	9.16344e-18	4	Erythro-Mas, Mk/Er	hemoglobin subunit delta	ErP	FALSE	TRUE
Mk/Er	CD36	5.78567e-20	6.49371	0.889	0.142	1.7357e-16	4	Erythro-Mas, DC, Mk/Er	CD36 molecule	MEP	FALSE	TRUE
Mk/Er	BMP2K	5.56308e-10	5.93457	0.806	0.263	1.66892e-06	3	MPP/LMPP, B cell, Mk/Er	BMP2 inducible kinase	EMP	FALSE	TRUE
Mk/Er	MEIS1	0.00312809	13.1862	0.528	0.287	1	2.5	Mk/Er	Meis homeobox 1	Mk|MPP-cycle	FALSE	TRUE
Myeloid	MPO	0	8.85183	0.812	0.096	0	4.5	Myeloid	myeloperoxidase	GMP|Neu|Mo	TRUE	TRUE
Myeloid	CEBPA	7.06115e-225	4.79322	0.655	0.139	2.11835e-221	4.5	Myeloid	CCAAT enhancer binding protein alpha	Neu|Mo|GMP	TRUE	TRUE
Myeloid	ANXA1	0	3.51949	0.814	0.224	0	4	Erythro-Mas, Myeloid, DC	annexin A1		TRUE	FALSE
Myeloid	GAPDH	0	1.86194	0.873	0.4	0	4	Myeloid, Lymphoid, Mk/Er	glyceraldehyde-3-phosphate dehydrogenase		TRUE	FALSE
Myeloid	CTSG	4.14508e-160	9.34466	0.564	0.124	1.24352e-156	3.5	Myeloid	cathepsin G	Mo	FALSE	TRUE
Myeloid	HGF	2.25621e-98	11.5777	0.501	0.128	6.76862e-95	3.5	Myeloid	hepatocyte growth factor	Ba|Mas	FALSE	TRUE
T cell	SARAF	9.7575e-68	9.78334	0.948	0.431	2.92725e-64	4.5	T cell	store-operated calcium entry associated regulatory factor		TRUE	FALSE
T cell	BTG1	1.66634e-80	8.33038	0.978	0.385	4.99901e-77	4	B cell, Lymphoid, T cell	BTG anti-proliferation factor 1		TRUE	FALSE
T cell	B2M	9.81095e-60	3.08349	0.94	0.432	2.94328e-56	4	Lymphoid, DC, T cell, 18	beta-2-microglobulin		TRUE	FALSE
T cell	LTB	2.43814e-58	3.37753	0.933	0.236	7.31442e-55	4	B cell, Lymphoid, T cell	lymphotoxin beta	Ly	TRUE	TRUE
T cell	TMSB10	3.53139e-58	4.92645	0.94	0.445	1.05942e-54	4	DC, T cell, 18	thymosin beta 10		TRUE	FALSE
T cell	TNFAIP3	4.18158e-56	5.72442	0.821	0.209	1.25447e-52	4	DC, T cell, 18	TNF alpha induced protein 3	T cell	FALSE	TRUE
T cell	ETS1	1.60483e-54	10.2051	0.799	0.188	4.81448e-51	4	T cell, 18	ETS proto-oncogene 1, transcription factor	LMPP|Neu|Mo| T cell|NeuP	FALSE	TRUE
T cell	CD7	5.49722e-40	5.53628	0.731	0.211	1.64917e-36	4	Lymphoid, T cell	CD7 molecule	T cell CD8|NK	FALSE	TRUE

## Sheet: Supplemental Table S4
DEGs LGA vs CTRL
gene	baseMean	log2FoldChange	p-value	adjusted p-value
ELOA	105.529	-0.526737	1.24e-05	0.00168623
LAPTM4A	769.46	0.612608	0.00196733	0.0482262
PTGS2	239.136	-1.32648	1.66e-06	0.000376137
WDR47	33.2102	-0.851907	5.52e-05	0.00543656
GPATCH2	76.7148	-0.532493	0.000217031	0.0128157
TXNDC9	31.9495	-0.70568	0.000988279	0.033539
PLEK	121.725	-0.563651	0.00199811	0.0484551
C1orf109	40.7456	-0.923446	1.07e-05	0.00150405
UAP1	43.8408	-0.638891	9.83e-05	0.00763899
RBBP5	35.2144	-1.14258	6.5e-07	0.000166955
BCL11A	595.727	0.500443	6.87e-05	0.00630119
LRIF1	34.0385	-1.02217	6.31e-05	0.00605604
COPA	247.752	0.599517	3.02e-05	0.00327311
AHDC1	56.4356	-0.794585	0.0011502	0.0365271
SESN2	43.8046	-1.62805	3.45e-15	2.04e-11
GSTM3	53.8076	-0.772744	0.000612962	0.0241098
URB2	17.3816	-1.50417	1.83e-07	7.47e-05
TAF5L	38.4332	-0.633577	0.00157496	0.0420821
ALDH9A1	60.1779	-0.533832	0.00177684	0.0454211
ATP1B1	110.32	-0.71814	2.54e-07	9.68e-05
RGS16	15.2819	-2.01586	6.22e-06	0.000992366
TUFT1	12.2335	-1.106	0.0011524	0.0365271
DYRK3	35.7742	-0.840193	0.000509898	0.0210556
EFNA3	10.6194	-2.2022	3.2e-07	0.000114632
C1orf131	39.9309	-0.88496	0.000103809	0.00785888
GPATCH11	65.2629	-0.673305	0.000110867	0.00808236
DUSP2	836.766	-0.918555	1.49e-06	0.000344915
MED8	22.0846	-1.06677	1.26e-05	0.00168623
BSDC1	178.504	0.806846	0.000864918	0.0307671
ADAR	259.666	0.591227	0.000942375	0.0325553
BEND5	41.4535	-0.542343	0.00159953	0.0426421
PEF1	90.2845	0.633456	5.34e-05	0.0053075
IER5	415.042	-0.505164	0.000236764	0.0135081
BROX	99.6335	0.520841	0.000771702	0.0282486
CDC42EP3	54.1303	-0.500862	0.00173457	0.0449237
E2F6	13.0151	-1.0216	0.00144813	0.040915
LUZP1	215.845	-0.526217	0.000614483	0.0241098
IFFO2	36.7894	-1.45305	1.17e-10	2.31e-07
SLC30A1	14.365	-1.55356	6.34e-06	0.000997707
ACYP2	75.0554	0.543621	0.000155694	0.0104474
FOXN2	50.7131	-0.806959	3.8e-07	0.000124502
PLK3	133.439	-1.07654	0.000269242	0.014586
PDIK1L	38.073	0.757692	0.000106058	0.00792753
MTF1	27.9707	-1.31121	4.23e-08	2.63e-05
SEMA4A	29.9226	-0.849018	0.0018994	0.0475252
C1D	101.386	0.651184	0.00126503	0.0382097
CEBPZOS	128.607	0.518073	0.000168292	0.0109809
CYTOR	84.9219	0.590779	0.000572784	0.0230088
MIR181A1HG	174.869	1.08543	3.01e-06	0.000583338
LINC00342	43.5058	0.617008	0.00156639	0.041948
LINC01355	8.8467	-1.50983	0.00199079	0.0484551
TXNIP	604.053	0.860324	3.84e-05	0.00405378
LINC01954	9.80661	-2.05233	0.000467494	0.020004
ABHD5	116.094	-0.7909	0.000128042	0.00905491
ASTE1	48.4714	-0.860735	0.000377212	0.0174864
RIOK2	43.7395	-0.777297	0.000368506	0.0174864
CHIC2	86.9053	-0.529805	0.000335118	0.0167701
KLF3	440.754	0.747314	0.00109816	0.0355572
HMGCS1	177.139	-0.720525	0.00049697	0.0206663
ARRDC3	76.539	-0.569548	0.000166435	0.0109809
GNB4	190.967	0.739674	0.000273296	0.014671
KLHL24	410.557	0.653537	0.00105918	0.0352365
ACSL3	89.7908	-0.514221	0.000171492	0.0111156
ZSWIM6	61.9621	-0.73219	0.000143741	0.00981261
HACL1	50.054	-0.578064	0.00196345	0.0482262
STAT4	9.70999	1.50232	0.000971401	0.0331191
RASGEF1B	209.314	-0.922923	2.85e-07	0.000105332
OSBPL11	34.6572	-0.626872	0.000918677	0.0320047
LPP	145.68	0.520419	9.42e-05	0.00751391
MANF	89.6674	-0.857262	3.15e-08	2.4e-05
SETD7	68.7625	0.719983	0.00054349	0.0220571
DPH3	46.3995	-0.66432	0.000368533	0.0174864
ZCCHC10	66.6274	-0.562448	0.000519562	0.0212319
LHFPL4	7.81263	-1.85409	0.00188732	0.047525
CCNYL1	38.2328	-0.677605	0.000382632	0.0174864
DCAF16	108.02	0.576473	2.53e-05	0.00293272
NPPC	20.1472	-1.32156	0.000101051	0.00772512
MAP9	64.2939	-0.961146	5.69e-05	0.00555582
RICTOR	239.903	0.719518	0.000389586	0.0175611
PHAX	67.2725	-0.551811	0.000554023	0.0224076
ING2	116.163	-0.689166	9.38e-07	0.000230851
CDKN2AIP	92.6816	-0.857287	7.7e-08	3.95e-05
INPP5D	278.725	0.62099	0.000110592	0.00808236
ARL13B	20.5145	-0.966986	0.000134824	0.00936633
ETFDH	56.5491	0.675553	0.000697634	0.0264243
ENC1	9.06361	-1.74199	0.000175064	0.0111757
MOB1B	91.9091	0.872619	0.000758904	0.0280961
ZNF622	42.8745	-0.628687	0.00171474	0.0446058
PHC3	83.8242	0.710569	4.4e-06	0.000787839
FBXO45	25.5204	-0.747894	0.000432845	0.0188631
ZNF620	30.4374	-0.790846	0.000253028	0.0141624
MLF1	99.1859	-1.38625	8.71e-07	0.00021874
LCORL	42.7275	-1.09732	4.33e-07	0.000137744
RAP2B	131.103	0.540955	0.00176493	0.0454114
FAM43A	32.3381	-1.31952	8.76e-06	0.00129371
SACM1L	125.759	0.525456	0.00081398	0.0293979
ARIH2OS	84.7068	-0.819634	1.27e-05	0.00168623
MUC20-OT1	100.275	-0.713335	2.41e-05	0.00281254
SHLD3	10.383	1.12371	0.000973102	0.0331191
LINC01215	17.023	1.29227	0.00156193	0.0419238
ENPP4	59.0572	0.831707	0.00171863	0.0446089
MYLIP	114.206	-0.613175	6.41e-05	0.00609353
RRAGD	44.3366	-0.656215	0.000201371	0.0120721
NOP16	38.8843	-0.689743	0.000386448	0.0174864
GPKOW	14.9775	-1.05098	0.000462659	0.0199416
ACHE	9.61983	-1.79319	0.000263297	0.014396
FKBP5	45.7244	-0.708856	0.00182926	0.0463596
CASP2	117.683	0.669457	0.000238772	0.0135572
PAK1IP1	30.4248	-0.952585	0.000370231	0.0174864
ASF1A	32.1919	-0.652039	0.000789056	0.0285851
CD83	219.597	-0.899608	0.000151248	0.0102658
HBS1L	182.678	0.553939	0.00192257	0.047926
SLC16A10	15.549	-1.13429	0.000679502	0.0259706
VEGFA	21.6444	-1.14997	0.0017504	0.0451359
ATP6V0E1	104.248	-0.647005	0.000466158	0.020004
TNFAIP3	256.494	-0.876319	3.89e-08	2.63e-05
EGR1	1125.19	-0.71831	1.9e-05	0.00234316
NDUFAF4	39.233	-0.793726	7.78e-05	0.00663912
CDKN1A	130.12	-1.00984	2.89e-06	0.000568932
RIOK1	78.8854	-0.6651	0.000385239	0.0174864
RNF113A	70.1207	-0.549507	2.59e-05	0.00297441
POR	29.2556	-0.678408	0.00144806	0.040915
DNAJB9	105.758	-0.596067	1.24e-05	0.00168623
FIGNL1	18.7111	0.988651	0.00153844	0.0419238
TUBB2A	12.1127	-1.22244	0.00107184	0.0354224
IER3	456.913	-1.42476	1.31e-07	5.97e-05
VWDE	13.0772	1.04425	0.00107677	0.0354224
GNA12	81.6753	0.556035	0.000675592	0.025905
GCNA	10.4393	-1.35656	0.00105721	0.0352365
CNKSR2	16.0222	-1.21691	3.42e-05	0.0036395
FGF18	16.8204	-1.79517	0.000287052	0.0149343
CGAS	43.9081	-0.971647	6.36e-08	3.58e-05
SFXN1	304.06	1.02188	0.000332767	0.0167233
TAGAP	93.5194	-0.849051	1.68e-08	1.42e-05
FMC1	88.7763	-0.624006	7.98e-05	0.00664923
INTS6L	64.8866	-0.667598	3.28e-05	0.00352334
UBTD2	30.5048	-0.723278	0.000339084	0.016826
POLR1C	39.4416	-0.742596	6.12e-05	0.00592162
BPGM	30.3126	-0.984815	8.41e-05	0.00693288
ZBTB2	66.4202	-0.92684	6.55e-05	0.00609353
PURA	74.9821	-0.571599	0.000117392	0.00845363
ZNF107	42.73	0.763484	0.00124337	0.0376679
BRD2	412.976	-0.611075	4.75e-07	0.000143743
RNF5	76.4583	-0.579579	0.00162932	0.0432409
HSPA1B	1259.01	-1.12634	5.23e-07	0.00015179
HSPA1A	2750.3	-1.44281	1.14e-09	1.92e-06
FAM71F2	13.5121	-1.23914	0.000479092	0.0200641
ARHGEF35	10.6207	1.23412	0.00108665	0.0355572
LINC00685	49.4347	-0.814245	0.000257566	0.0143484
ZNF674-AS1	35.8298	0.777799	8.49e-06	0.00126894
HLA-DMB	85.0956	0.581124	0.00139591	0.0406052
EED	35.3066	-0.709631	0.000357469	0.017421
DNAJA1	1260.16	-0.973333	1.49e-13	4.38e-10
BAMBI	7.39945	-2.11393	2.89e-05	0.00321671
NIPAL2	22.9242	1.01137	7.78e-05	0.00663912
SQLE	132.957	-0.556911	2.96e-05	0.003242
DCTN6	97.3901	0.707442	0.000873761	0.0308008
MAP3K8	857.594	0.864772	0.00188373	0.047525
HSPA8	1191.13	-0.596898	4.01e-08	2.63e-05
KLF9	59.8639	0.604152	0.000439595	0.0190868
TTF1	209.056	0.733113	0.000612567	0.0241098
GADD45G	73.1042	-1.08423	0.000962361	0.0329434
TGS1	87.3534	-0.525651	7.06e-05	0.00631688
SORL1	427.08	0.781456	0.00102188	0.034407
CHMP7	18.1562	-1.09399	0.000370545	0.0174864
SLC39A4	57.6813	0.672435	0.000700613	0.0264353
MFSD14B	28.1997	-1.04128	5.66e-07	0.000155493
PROSER2	22.3594	-1.27644	1.01e-07	4.78e-05
RPP38	26.9214	-1.1924	1.97e-05	0.00239969
RALGDS	81.7324	-0.688383	7.27e-05	0.00645271
SLC2A6	7.57791	1.33558	0.00102775	0.0344821
TTC9C	57.6594	-0.578521	0.00111362	0.0359341
TMEM67	39.5746	-0.671902	0.000665372	0.0256799
CDK2AP2	39.1683	-0.772483	0.000108036	0.00797439
SLC3A2	216.142	-0.695581	1.03e-06	0.000249081
STIP1	100.997	-0.666415	0.000227263	0.0132216
TMEM223	40.3339	-0.813871	7.43e-05	0.00647546
ZBTB43	102.946	0.793133	0.000935866	0.0325076
COMMD5	19.1673	-0.914587	0.000192699	0.0119942
CHCHD7	151.083	-0.569127	0.000267634	0.0145657
C2CD2L	18.0932	-1.1225	0.000961696	0.0329434
TNFRSF10D	35.4405	-1.29122	5.78e-09	5.69e-06
CCS	93.7427	0.56348	0.000262623	0.014396
NRIP3	22.9889	-1.24437	3.35e-06	0.000627987
EIF1AD	35.0591	-0.672567	0.00165439	0.04371
PHLDA2	19.8542	-1.38904	0.000116176	0.00841741
C11orf96	66.9497	-1.2696	3.66e-06	0.000664896
TUBB4B	453.825	-0.675723	0.00113719	0.0362979
CBWD3	26.6528	0.80251	0.000819005	0.0294892
MAK16	19.41	-0.96881	0.000292361	0.0151438
ARC	24.0009	-1.61973	0.000107754	0.00797439
CTR9	88.2007	-0.848608	1.57e-07	6.62e-05
GASAL1	19.9684	-0.770929	0.00146739	0.0412241
KCNQ1OT1	654.46	-0.540901	0.00024352	0.0137606
CRY1	28.2564	-0.698548	0.000712333	0.0267919
UBE2D1	45.9168	-1.37636	4.21e-09	5.25e-06
BAZ2A	341.381	0.636675	6.21e-06	0.000992366
NUFIP1	52.5121	-0.626121	0.00109595	0.0355572
DYNLL1	613.995	-1.05894	8.14e-06	0.00123301
SIRT1	67.1111	-0.996471	4.45e-09	5.25e-06
ATP6V1D	45.9401	-0.84298	5.27e-07	0.00015179
AHSA1	170.474	-0.724831	7.46e-05	0.00647546
RPS6KA5	69.4227	-0.853281	0.00020005	0.0120721
TRIP11	100.136	-0.870644	2.02e-06	0.000426383
NFKBIA	2908.58	-0.761257	0.00197233	0.0482262
BRMS1L	15.7813	-0.844968	0.00151786	0.0417854
RGCC	277.367	-1.78623	6.31e-12	1.49e-08
TFAM	112.579	-0.672996	1.9e-06	0.000408806
DDX55	48.9421	-0.598054	0.0020346	0.0492389
SLIRP	121.455	-0.668572	0.000370473	0.0174864
HSPH1	372.635	-0.943032	7.27e-18	8.59e-14
UBL3	87.8998	-0.725655	5.05e-06	0.000889573
ATF1	49.6438	-0.591775	0.000384558	0.0174864
EFNB2	19.0957	-1.19285	7.84e-06	0.0012187
PTGER2	21.0118	-0.885282	0.00140119	0.0406363
PCNX4	101.413	-0.627236	1.9e-06	0.000408806
RAB3IP	94.5359	-0.649733	0.000179142	0.0113138
GCH1	19.7033	-1.06545	1.79e-05	0.00224608
CNMD	10.533	1.18777	0.00189571	0.0475252
DUSP5	16.0033	-0.968586	0.000504797	0.0209181
GABARAPL1	81.655	0.80087	0.00121164	0.037447
JDP2	14.4387	-1.70789	2.06e-06	0.000427408
NRBF2	53.4957	-1.10325	1.49e-08	1.35e-05
MKI67	18.4132	-1.80059	1.77e-05	0.00224218
TAF5	15.9244	-1.06272	0.0002324	0.0134542
PPRC1	28.9939	-1.06783	6.43e-07	0.000166955
TMCO3	48.1071	0.859089	1.68e-05	0.00215668
SAV1	52.6262	-0.718848	0.0017736	0.0454211
BAG3	46.3571	-0.673651	0.00155599	0.0419238
CFL2	43.7023	0.616363	0.00109209	0.0355572
IKBIP	58.6251	-0.566411	0.000173182	0.0111156
NAB2	17.0196	-1.14493	0.00152695	0.0418959
RND1	21.1332	-1.2602	0.000224433	0.0131808
C12orf76	101.006	0.568609	0.00147117	0.0412241
CCDC184	6.71997	-1.63603	0.000130964	0.00915921
C14orf119	19.5075	-1.03819	0.00035845	0.017421
MCMBP	46.3013	-0.801237	0.000415556	0.018381
PNP	131.464	-1.0285	9.73e-06	0.00139701
ATXN2	249.115	-0.645695	3.36e-07	0.000116816
CCDC85C	16.0519	0.950281	0.00027579	0.0146804
CRIP1	79.0603	-0.85205	5.47e-07	0.000153925
MEG8	50.472	-1.0039	2.05e-07	8.07e-05
DDN-AS1	38.2448	-0.951512	5.21e-06	0.000900924
LIG3	56.8811	0.690672	0.00137869	0.0403029
TNFRSF12A	44.4151	-1.07834	0.00106436	0.0353093
AQR	61.9076	-0.591231	0.000284901	0.014919
PHF23	71.817	-0.791619	1.09e-05	0.00151236
HERPUD1	186.622	-0.769149	0.00113147	0.0362132
APPBP2	53.1851	-0.521923	0.000580528	0.0232408
PLEKHH3	10.4214	-1.67698	0.000167498	0.0109809
CFAP20	115.932	-1.0859	1.82e-06	0.000405444
DERL2	56.238	-0.65392	2.76e-05	0.00311658
METTL2A	38.3115	-0.710949	0.000188746	0.0118569
RNMT	401.24	0.682456	0.00177385	0.0454211
MGRN1	131.893	0.789294	2.4e-06	0.000481023
TUBD1	24.0058	-0.727249	0.00133322	0.039561
MED31	21.9638	-0.830895	0.000371408	0.0174864
DHRS7B	50.3073	-0.638935	0.00129031	0.0385948
SPOP	108.707	-0.531922	0.000496769	0.0206663
TXNDC17	91.3521	-0.760685	0.000424309	0.0186286
PSMC3IP	9.32631	-1.15914	0.00141739	0.0407981
NDUFAF1	21.2522	-0.827267	0.00026007	0.014396
SEMA7A	12.7608	-1.62555	7.99e-05	0.00664923
DNAJA4	48.5901	-0.815631	9.02e-05	0.00729747
CYP1A1	44.5418	-1.66732	3.08e-06	0.000586272
EIF4A3	186.361	-0.833943	3.61e-07	0.000121782
DGKE	196.764	1.01878	1.51e-07	6.59e-05
ZNF689	28.4292	-0.786811	0.00123599	0.0376679
ABHD3	55.5669	-0.727772	0.000251722	0.0141564
SPATA2L	17.4018	-0.934675	0.00189784	0.0475252
ATP6V0D1	54.8562	-0.561653	0.0017832	0.0454851
ARIH1	409.917	-0.564861	0.00111963	0.0360234
LEO1	58.3651	-0.554004	0.00135679	0.0398599
ATF7IP2	242.388	0.671623	0.000457151	0.0197764
GREM1	10.2263	-1.38255	0.00101769	0.034407
TK1	18.4316	-1.53059	0.000136229	0.00940855
GHDC	35.0599	0.631507	0.00078401	0.0285777
KCTD5	22.9853	-0.908867	9.59e-05	0.00759937
MAP2K1	38.3554	-0.899426	2.93e-05	0.00323031
ADPRM	64.4436	0.53487	0.00199527	0.0484551
FAM98B	68.5741	0.533344	0.00142697	0.0408051
C16orf91	56.2887	-0.910821	1.29e-05	0.00168623
CMTR2	39.4251	-0.589565	0.00144182	0.040915
CYB5D1	27.5726	-0.957221	0.000698086	0.0264243
SOCS3	332.1	-0.548966	0.00198127	0.0483447
FMNL1	281.469	0.552881	7.81e-05	0.00663912
CCDC137	52.9243	-0.92476	5.02e-05	0.00515413
C16orf54	69.6922	-1.00034	9.8e-05	0.00763899
HEXIM1	152.154	-0.797332	0.0010226	0.034407
FAM215B	66.764	1.08134	0.000207406	0.012371
LRRC37A2	18.2711	1.53248	9.09e-05	0.00730401
PLEKHO2	16.9882	-0.983715	0.000772591	0.0282486
HYPK	46.4674	0.555142	0.00207453	0.049783
C17orf100	7.36542	-1.36718	0.00035383	0.0174114
LINC00526	7.76541	-1.29037	0.00112249	0.0360234
ZFY	77.0283	-1.36622	4.66e-05	0.00482466
ITPKC	15.7599	-1.04047	0.000283107	0.014919
TRMT6	22.2502	-0.922081	0.00155855	0.0419238
ICAM1	48.0439	-2.34734	1.33e-05	0.00172962
GADD45B	807.722	-1.55365	0.00012326	0.00876931
TFIP11	29.9142	-1.02936	8.09e-06	0.00123301
PCIF1	99.2747	0.952589	5.35e-05	0.0053075
CDS2	129.557	0.608626	5.26e-06	0.000900924
NOP56	251.683	-0.625136	0.000516974	0.0212319
SMAD7	20.5292	-1.64327	0.000323456	0.0163493
IL27RA	77.866	-0.523565	0.000536479	0.0218477
SLC1A5	30.6496	-1.28646	4.43e-07	0.000137744
BBC3	23.9786	-0.828339	0.000634841	0.0247441
GRWD1	28.456	-0.888475	0.000323941	0.0163493
LENG1	34.4735	-0.697665	0.000751395	0.0279936
ADGRE5	94.0493	-0.973326	3.25e-08	2.4e-05
NCOA5	11.541	-1.21482	0.00195488	0.0482262
SNAI1	27.5738	-1.28807	9.82e-06	0.00139701
TNFSF9	24.2681	-1.34621	5.16e-05	0.00520564
ID1	368.593	-0.943757	0.00109394	0.0355572
KLF2	949.47	-0.615388	1.35e-06	0.000318529
ZFP36	2149.97	-0.700764	2.25e-06	0.000459067
SDF2L1	59.4555	-0.687842	2.26e-05	0.00266929
DOHH	17.7443	-1.04876	0.00107645	0.0354224
SYT5	21.963	-1.16632	0.000177746	0.0112859
NFATC1	172.39	-0.89164	5.72e-09	5.69e-06
DNAJB1	603.082	-0.8775	4.67e-14	1.84e-10
PCNA	40.1237	-1.0004	0.000571472	0.0230088
CXADR	7.32949	-1.43443	0.00169844	0.0445363
ICOSLG	22.9711	0.901686	0.0012204	0.037447
IER2	2817.41	-0.634209	5.82e-08	3.44e-05
SERPINB8	13.6261	-1.30265	0.000131067	0.00915921
TPM4	867.843	0.611801	0.00116866	0.0368049
SERTAD3	93.4768	-0.64794	0.00138281	0.0403234
ZNF296	24.3116	-1.93104	8.08e-08	3.98e-05
JUNB	2623.51	-0.795893	3.15e-09	4.65e-06
MEX3C	88.3696	0.615887	6.53e-05	0.00609353
TTTY14	18.2566	-2.60988	7.35e-08	3.95e-05
MYADM	995.775	-0.715849	0.000235252	0.013487
SPACA6	23.4735	-1.01023	0.000338849	0.016826
TOB2	183.193	-0.538511	0.000152764	0.0103094
C22orf46	54.874	-0.579131	0.00181581	0.0461371
PIGP	94.6742	0.52274	6.99e-05	0.00630119
CCDC157	10.6216	-1.13907	0.000730525	0.0273889
EIF1AY	113.807	-1.02235	0.00134954	0.039746
ZNF358	41.7335	0.512824	0.00195038	0.0482262
TOP1	360.266	-0.589517	6.15e-07	0.000165047
ZNF816-ZNF321P	24.0732	1.24195	0.00155786	0.0419238
ZNF880	32.8664	1.13254	2.01e-05	0.00242062
MHENCR	53.5618	0.823864	0.000372863	0.0174864
NFS1	11.7669	-1.31276	0.000842117	0.0302292
CARD8-AS1	24.6015	-0.914843	0.00016672	0.0109809
UHRF1	24.2935	-1.3252	0.00010502	0.00789994
AL031283,1	6.31644	-1.33209	0.00152897	0.0418959
AL445248,1	16.2797	1.01017	0.000476371	0.0200211
AC004865,2	50.3592	0.632834	7.41e-05	0.00647546
ADPRHL2	23.8208	-0.66682	0.00136027	0.0398631
AC099568,2	9.8809	-1.04564	0.00131905	0.0392393
AC104506,1	24.6342	-0.85149	0.00206467	0.0496613
SSFA2	110.592	0.589102	0.00192759	0.047926
AC114760,2	65.7886	0.812666	0.000411071	0.0182509
FAM198B	13.7384	-1.08494	0.00118971	0.0370726
AC025171,3	78.4302	-0.758252	0.000140317	0.00963458
HIST1H4C	628.053	-0.554673	0.000234603	0.013487
AC005082,1	14.2834	-0.961112	0.00148649	0.0412241
AC015987,1	8.9621	1.19849	0.00119387	0.0371042
FAM122C	46.4463	-0.625668	0.001487	0.0412241
AL157938,3	31.7885	0.750185	0.000377611	0.0174864
H2AFX	134.673	-0.94846	6.15e-06	0.000992366
KIF1BP	20.7339	-1.00908	0.00166702	0.0439453
AL121603,2	44.7976	-0.644693	0.000598764	0.0237295
AC091271,1	172.979	-0.51797	0.00122075	0.037447
AP000845,1	29.4771	-0.833006	0.000199038	0.0120721
AP005329,1	17.9263	-1.37584	5.14e-05	0.00520564
AC020916,1	467.372	-0.95745	0.000917987	0.0320047
AC022098,4	10.6737	-1.66451	3.47e-06	0.000641206
AC020911,2	87.4997	-0.634642	0.00118336	0.0370726
AC006157,1	11.1875	-2.18634	6.96e-05	0.00630119

## Sheet: Supplemental Table S5
List of regulons
Regulon	Associated genes
ETS2	CHST11
ETS2	CPPED1
ETS2	FBRS
ETS2	IRF1
ETS2	SLC39A8
ETS2	ZBTB16
ETS2	BCOR
ETS2	CREB5
ETS2	CTBP2
ETS2	ELF1
ETS2	FOXO3
ETS2	NFKB1
ETS2	PELI2
ETS2	PRKACB
ETS2	RAB33A
ETS2	TET2
ETS2	YTHDF2
ETS2	ZCCHC3
ETS2	ZEB2
ETS2	PBX1
ETS2	SKIL
NFIA	AMD1
NFIA	ELMO1
NFIA	EREG
NFIA	KCNH2
NFIA	MECOM
NFIA	MYC
NFIA	NEDD4L
NFIA	NFIA
NFIA	PBX1
NFIA	PLXDC2
NFIA	THRB
NFIA	ZBTB20
NFIA	ACSM3
NFIA	ARL5B
NFIA	CA5B
NFIA	CCND2
NFIA	CD36
NFIA	CD59
NFIA	CDK17
NFIA	CFH
NFIA	CREB5
NFIA	CRHBP
NFIA	DACH1
NFIA	DGKE
NFIA	ENPP4
NFIA	FAM124B
NFIA	FAM178B
NFIA	FHL2
NFIA	FOXO3
NFIA	GATA1
NFIA	HDAC7
NFIA	HSPG2
NFIA	HTR1F
NFIA	INPP4B
NFIA	ITGAV
NFIA	KIF1B
NFIA	LMO2
NFIA	LRP6
NFIA	MACC1
NFIA	MAP4K3
NFIA	MAP7
NFIA	MBOAT2
NFIA	NLK
NFIA	NPR3
NFIA	OBSCN
NFIA	PHACTR2
NFIA	PHACTR4
NFIA	PLCB4
NFIA	PRKACB
NFIA	RIPK2
NFIA	SERPINI1
NFIA	SLC12A6
NFIA	SLC39A8
NFIA	SLC40A1
NFIA	SOCS2
NFIA	SSX2IP
NFIA	TAL1
NFIA	TPM1
NFIA	ZBTB16
NFIA	ZMYND11
NFIA	ZNF521
NFIA	ATP1B1
FOXO3	ABTB1
FOXO3	BRD3
FOXO3	FOXO3
FOXO3	LTBP4
FOXO3	MAX
FOXO3	NR1D2
FOXO3	VEZF1
FOXO3	CCND2
FOXO3	IGSF10
FOXO3	NFIA
FOXO3	SLC39A8
FOXO3	TLE3
FOXO3	ZBTB16
FOXO3	MON2
FOXO3	NIPAL2
STAT5A	ALDH1A1
STAT5A	CD36
STAT5A	HDC
STAT5A	ICAM4
STAT5A	KLF1
STAT5A	PLXNC1
STAT5A	TAL1
STAT5A	TFR2
STAT5A	ZMYND8
STAT5A	HDAC7
STAT5A	LMO4
STAT5A	MAP7
STAT5A	PVT1
TAL1	ALDH1A1
TAL1	CD36
TAL1	CDC42BPA
TAL1	CNRIP1
TAL1	CTNNBL1
TAL1	FHL2
TAL1	GATA1
TAL1	GATA2
TAL1	KCNH2
TAL1	KLF1
TAL1	MBOAT2
TAL1	MYH10
TAL1	PDLIM1
TAL1	PHTF1
TAL1	PKIG
TAL1	PLXNC1
TAL1	PRKAR2B
TAL1	RAP2B
TAL1	SLC40A1
TAL1	SNX5
TAL1	TAL1
TAL1	TFR2
TAL1	UROD
TAL1	CSF2RB
TAL1	TPM1
TAL1	FAM178B
TAL1	FCER1A
TAL1	HBD
TAL1	ICAM4
TAL1	LXN
TAL1	MINPP1
TAL1	NECAB1
TAL1	NFIA
TAL1	S100A6
TAL1	B3GNT2
TAL1	CALM2
TAL1	DAAM1
TAL1	FADS2
TAL1	FOXO3
TAL1	HBS1L
TAL1	HDAC7
TAL1	HDC
TAL1	ITGB1
TAL1	LIMS1
TAL1	LMO2
TAL1	NEDD4L
TAL1	NLK
TAL1	NRGN
TAL1	PLIN2
TAL1	PNN
TAL1	PRDX2
TAL1	SERPINE2
TAL1	SLC39A8
TAL1	SSX2IP
TAL1	UBE2F
TAL1	ZBTB16
TAL1	ZFPM1
TAL1	ARHGAP21
TAL1	NUDT4
TAL1	RAB9A
TAL1	CPPED1
GATA1	CD36
GATA1	FCER1A
GATA1	GATA1
GATA1	GATA2
GATA1	HDC
GATA1	KLF1
GATA1	PNMT
GATA1	TAL1
GATA1	TFR2
GATA1	CTNNBL1
GATA1	KCNH2
GATA1	MINPP1
GATA1	PDLIM1
GATA1	PKIG
GATA1	PRKAR2B
GATA1	BLVRB
GATA1	MYC
GATA1	SLC40A1
GATA1	UROD
GATA1	CPA3
GATA1	DAD1
GATA1	FAM178B
GATA1	HPGDS
GATA1	MYH10
GATA1	PDZD8
GATA1	PVT1
GATA1	REXO2
GATA1	APOC1
GATA1	CSF2RB
GATA1	SNX5
GATA1	FADS2
GATA1	HMGA1
GATA1	STAT5A
GATA1	TPM1
GATA1	ACSM3
GATA1	CASP3
GATA1	CNRIP1
GATA1	ICAM4
GATA1	PLIN2
GATA1	TMEM14C
GATA1	BMP2K
GATA1	FBXO7
GATA1	MARCKSL1
GATA1	B3GNT2
GATA1	HBD
GATA1	MPP1
GATA1	NECAB1
GATA1	ABHD2
GATA1	AGL
GATA1	ALDH1A1
GATA1	ARHGAP21
GATA1	BRD3
GATA1	CDC42EP3
GATA1	COX17
GATA1	CPVL
GATA1	DAAM1
GATA1	E2F3
GATA1	ERN1
GATA1	ETS2
GATA1	FADS1
GATA1	FBXO9
GATA1	FHL2
GATA1	GALNT10
GATA1	HBS1L
GATA1	HDAC7
GATA1	ITGB1
GATA1	MAN2A1
GATA1	MBOAT2
GATA1	MED12L
GATA1	MYB
GATA1	NECAP1
GATA1	NEDD4L
GATA1	NLK
GATA1	PIGA
GATA1	PLXNC1
GATA1	PRDX2
GATA1	PRRC1
GATA1	PSMD12
GATA1	RAB9A
GATA1	RREB1
GATA1	SDCBP
GATA1	SLC3A2
GATA1	SSX2IP
GATA1	ST8SIA6
GATA1	TLN1
GATA1	TRAF5
GATA1	TUBA1C
GATA1	UBE2F
GATA1	UBR1
GATA1	USP47
GATA1	XPO1
GATA1	ZBTB16
GATA1	ZFPM1
GATA1	ACTB
GATA1	HMGB3
GATA1	LMO4
GATA1	ZEB2
GATA1	CAT
GATA1	PDCD4
GATA1	ACSL4
GATA1	IL1B
GATA1	LDHB
GATA1	MYL12A
GATA1	SLC12A6
GATA2	B3GNT2
GATA2	FCER1A
GATA2	GATA1
GATA2	GATA2
GATA2	HDC
GATA2	KLF1
GATA2	LMO4
GATA2	MINPP1
GATA2	TAL1
GATA2	ZEB2
GATA2	ALOX5AP
GATA2	CD63
GATA2	CTNNBL1
GATA2	DAD1
GATA2	EREG
GATA2	FADS2
GATA2	HPGDS
GATA2	PDCD4
GATA2	PKIG
GATA2	PNMT
GATA2	SLC40A1
GATA2	SLC45A3
GATA2	SNX5
GATA2	TFR2
GATA2	ZBTB16
GATA2	CPA3
GATA2	CSF2RB
GATA2	FBXO7
GATA2	GLUL
GATA2	HSPG2
GATA2	KCNH2
GATA2	TFRC
GATA2	CNRIP1
GATA2	CPPED1
GATA2	HBD
GATA2	ICAM4
GATA2	MPP1
GATA2	PDZD8
GATA2	SLC27A2
GATA2	ALDH1A1
GATA2	CAT
GATA2	CD36
GATA2	FAM117A
GATA2	FAM124B
GATA2	PLXNC1
GATA2	SLC12A6
GATA2	SLC39A8
GATA2	ZMYND8
GATA2	PHTF1
GATA2	CCND2
GATA2	CDK17
GATA2	CDK6
GATA2	FHL2
GATA2	FOXO3
GATA2	HDAC7
GATA2	HMGA1
GATA2	HMGB3
GATA2	IKZF2
GATA2	MARCKSL1
GATA2	MYC
GATA2	NR4A3
GATA2	P4HB
GATA2	RRBP1
GATA2	TPM1
GATA2	ZFPM1
GATA2	CD82
GATA2	DYM
GATA2	ELMO1
GATA2	FADS1
GATA2	FBXO9
GATA2	NECAP1
GATA2	NEDD4L
GATA2	PPM1A
GATA2	SERPINE2
GATA2	TET2
GATA2	TNFAIP8
GATA2	ZNF521
GATA2	KIT
GATA2	BMP2K
GATA2	MS4A3
GATA2	STAT5A
GATA2	CKB
GATA2	EIF5A
IKZF2	ALOX5AP
IKZF2	CBR4
IKZF2	CDK6
IKZF2	CHST12
IKZF2	FAM117A
IKZF2	FRY
IKZF2	IKZF2
IKZF2	ITGA4
IKZF2	KIT
IKZF2	LMO4
IKZF2	NCOA1
IKZF2	RPS6KA5
IKZF2	SERINC5
IKZF2	SLC45A3
IKZF2	SLITRK4
IKZF2	STAT5B
IKZF2	XPO6
IKZF2	YPEL1
IKZF2	ZBTB16
IKZF2	ZNF521
IKZF2	DLG1
MYB	CBLL1
MYB	CCDC88A
MYB	CDK6
MYB	DSTYK
MYB	GRAMD4
MYB	MAT2A
MYB	MLLT10
MYB	PPP1R12A
MYB	TMEM41B
MYB	TNRC18
MYB	TRIM24
MYB	ZC3H13
MYB	ZFP91
MYB	ZNF512B
MYB	AHCTF1
MYB	B3GNT2
MYB	CCND2
MYB	CD36
MYB	CD82
MYB	CHST12
MYB	CPA3
MYB	ERG
MYB	FAM117A
MYB	FAM178B
MYB	GATA2
MYB	H2AFY
MYB	HDAC7
MYB	HDC
MYB	IDH1
MYB	IKZF2
MYB	ITGA4
MYB	KIT
MYB	MBOAT2
MYB	MIB1
MYB	MYB
MYB	MYC
MYB	NECAB1
MYB	NLK
MYB	PCM1
MYB	POU2F1
MYB	PRRC1
MYB	RBPJ
MYB	RREB1
MYB	SLC12A6
MYB	SLC40A1
MYB	SLC45A3
MYB	SOX4
MYB	SPN
MYB	SRSF3
MYB	STAT5A
MYB	TFR2
MYB	TOPORS
MYB	XPO1
MYB	ZBTB16
MYB	ZEB2
MYB	ZMYND8
MYB	ZNF711
MYB	CENPJ
MYB	CKS2
MYB	DBF4
MYB	H2AFV
MYB	HNRNPU
MYB	IGLL1
MYB	KCNH2
MYB	LYAR
MYB	MAP7
MYB	MDM2
MYB	MSL2
MYB	MYH10
MYB	RIMKLB
MYB	RSBN1
MYB	SPTY2D1
MYB	SUGT1
MYB	TKT
MYB	TNPO2
MYB	UHRF2
MYB	VPS13A
MYB	ACSS1
MYB	AMD1
MYB	CST3
MYB	FAR1
MYB	ITPR2
MYB	KDM5B
CTCF	CASP8AP2
CTCF	CENPM
CTCF	CEP152
CTCF	CTCF
CTCF	HMGB2
CTCF	LIG1
CTCF	MCM3
CTCF	MCM4
CTCF	MCM5
CTCF	MCM6
CTCF	NHLRC2
CTCF	UHRF1
CTCF	USP1
BRCA1	ATAD5
BRCA1	BRCA1
BRCA1	CHAF1A
BRCA1	EPB41L2
BRCA1	FAM111A
BRCA1	FAM161A
BRCA1	FANCI
BRCA1	HELLS
BRCA1	HMGB2
BRCA1	KIF20B
BRCA1	LIG1
BRCA1	MCM4
BRCA1	MMS22L
BRCA1	MSH6
BRCA1	ORC6
BRCA1	SMC1A
BRCA1	SVIP
BRCA1	TMPO
BRCA1	WEE1
BRCA1	BRCA2
BRCA1	BRI3BP
BRCA1	CENPJ
BRCA1	CEP78
BRCA1	GOLIM4
BRCA1	IPO9
BRCA1	NRGN
BRCA1	PRC1
BRCA1	RRM1
BRCA1	SMC2
BRCA1	TYMS
BRCA1	UBE2T
BRCA1	HMGXB4
BRCA1	CACYBP
BRCA1	CASP8AP2
BRCA1	CDC20
BRCA1	CEP152
BRCA1	CKAP5
BRCA1	DHFR
BRCA1	EZH2
BRCA1	FUS
BRCA1	GINS2
BRCA1	HMGB1
BRCA1	HMGB3
BRCA1	HNRNPAB
BRCA1	LMNB1
BRCA1	MASTL
BRCA1	MCM2
BRCA1	MCM3
BRCA1	MCM5
BRCA1	NCL
BRCA1	NUCKS1
BRCA1	PRKDC
BRCA1	PTTG1
BRCA1	RAN
BRCA1	SNRPG
BRCA1	STMN1
BRCA1	TMEM106C
BRCA1	TPX2
BRCA1	TUBA1C
BRCA1	UHRF1
BRCA1	USP1
BRCA1	CCNB2
BRCA1	H2AFZ
BRCA1	MAD2L1
BRCA1	UNG
MAZ	AMPD2
MAZ	ARID3A
MAZ	CFL1
MAZ	CIZ1
MAZ	FLNA
MAZ	GAPDH
MAZ	HDAC7
MAZ	HMGA1
MAZ	MBD5
MAZ	PFN1
MAZ	POGZ
MAZ	PPP1R9B
MAZ	RREB1
MAZ	SET
MAZ	TAOK1
MAZ	UBE4B
MAZ	VAT1
MAZ	ZC3H4
MAZ	ZSWIM6
MYC	CALR
MYC	CEBPA
MYC	FAM178B
MYC	FKBP11
MYC	GADD45G
MYC	H2AFV
MYC	HLTF
MYC	HMGA1
MYC	HNRNPF
MYC	HSPH1
MYC	ITGB1
MYC	LYAR
MYC	MAP7
MYC	MDN1
MYC	MT2A
MYC	NCL
MYC	NFIA
MYC	NOL8
MYC	ODC1
MYC	PDCD4
MYC	PDZD8
MYC	PRDX2
MYC	PVT1
MYC	RAN
MYC	REXO2
MYC	RREB1
MYC	RRN3
MYC	S100A6
MYC	SLC7A5
MYC	SOX4
MYC	SPTY2D1
MYC	SRM
MYC	SSX2IP
MYC	TAF4B
MYC	TESC
MYC	TOP1
MYC	YBX1
MYC	ACTN1
MYC	B3GNT2
MYC	BAZ1A
MYC	CACYBP
MYC	CST3
MYC	CST7
MYC	FADS2
MYC	HSPA8
MYC	HSPG2
MYC	LMNB1
MYC	MAT2A
MYC	MYB
MYC	NEDD4L
MYC	NET1
MYC	NPM1
MYC	PA2G4
MYC	PTMA
MYC	SERBP1
MYC	STAT5A
MYC	SUCLG2
MYC	TFRC
MYC	TPM1
MYC	XPO1
MYC	CAST
MYC	CCNB1
MYC	FKBP4
MYC	HAGHL
MYC	HDAC7
MYC	HSPD1
MYC	ICAM2
MYC	NCOA4
MYC	PGAM1
MYC	PNP
MYC	PRKAR2B
MYC	RAP2B
MYC	RIF1
MYC	TNFAIP3
MYC	TRIM28
MYC	VDAC1
MYC	ZNF706
MYC	CSF2RB
MYC	BRI3BP
MYC	MYL12A
MYC	SLC27A2
MYC	JOSD1
MYC	PNN
MYC	DYNLL1
MYC	KCNH2
MYC	LEF1
MYC	RPS27L
MYC	TMEM14C
MYC	EIF4G2
MYC	APOC1
MYC	COX17
MYC	DAAM1
MYC	FHL2
MYC	MYH10
MYC	NME1
MYC	SLC12A6
MYC	SLC25A37
MYC	STK17A
MYC	MBOAT2
MYC	SDCBP
MYC	AGL
MYC	CNRIP1
MYC	CYCS
MYC	MYC
MYC	BTG1
MYC	CAT
MYC	CD36
MYC	CKAP2
MYC	CTSG
MYC	EPSTI1
MYC	FBXO7
MYC	FCER1A
MYC	GATA1
MYC	HDC
MYC	MTR
MYC	PKIG
MYC	ZFPM1
MYC	ANKRD26
MYC	ESF1
MYC	FABP5
MYC	TAL1
MYC	CBLL1
MYC	FLNA
MYC	EIF3A
MYC	ITPR2
MYC	MGST1
MYC	ACSM3
MYC	KLF1
MYC	LTN1
MYC	TFR2
MYC	PPIF
MYC	NPW
MYC	AGTRAP
MYC	ATP6V0B
MYC	CCAR1
MYC	CTSA
MYC	FEN1
MYC	GATA2
MYC	LZTFL1
MYC	MGAT4A
MYC	ORAI2
MYC	OSM
MYC	PIM1
MYC	PPM1A
MYC	SRSF2
MYC	SUPV3L1
MYC	TNPO2
MYC	TUBA1C
MYC	ZFP36L1
MYC	SYNGR2
E2F1	UBE2C
E2F1	BIRC5
E2F1	CDK2AP2
E2F1	CEP78
E2F1	MASTL
E2F1	ORC6
E2F1	AURKB
E2F1	NUCKS1
E2F1	ACTB
E2F1	ANP32E
E2F1	CACYBP
E2F1	COX17
E2F1	DCTPP1
E2F1	GAPDH
E2F1	HMGB3
E2F1	HNRNPA2B1
E2F1	HSP90AA1
E2F1	IGFBP2
E2F1	KIF20B
E2F1	MCM2
E2F1	PTMA
E2F1	TUBA1C
E2F1	UBE2S
E2F1	UNG
E2F1	CCNB1
E2F1	HIST1H1C
E2F1	OAZ1
E2F1	P4HB
E2F1	PFN1
E2F1	PPIA
E2F1	PRKDC
E2F1	PTTG1
E2F1	RANBP1
E2F1	SRSF2
E2F1	BRI3BP
E2F1	TACC3
E2F1	ATP1B3
E2F1	CALM1
E2F1	CALR
E2F1	CAPG
E2F1	CBX4
E2F1	CDKN2AIP
E2F1	CKAP5
E2F1	CLIC4
E2F1	DLEU2
E2F1	FLNA
E2F1	H2AFY
E2F1	HMGA1
E2F1	HMGN3
E2F1	HNRNPAB
E2F1	HNRNPF
E2F1	HSPA8
E2F1	ING1
E2F1	ING2
E2F1	LDHA
E2F1	NAP1L1
E2F1	NPW
E2F1	NUCB2
E2F1	PA2G4
E2F1	PTP4A2
E2F1	SET
E2F1	SRM
E2F1	SRSF3
E2F1	TMSB4X
E2F1	UBB
E2F1	APLP2
E2F1	ARL6IP1
E2F1	ATP2A3
E2F1	CCND3
E2F1	H1FX
E2F1	HSPD1
E2F1	NUP50
E2F1	ODC1
E2F1	SNRPG
E2F1	UQCR10
E2F1	ABHD5
E2F1	ACTN1
E2F1	ATP6V0B
E2F1	CKB
E2F1	CLEC11A
E2F1	COTL1
E2F1	CSTB
E2F1	EIF5A
E2F1	GGA2
E2F1	LGALS1
E2F1	MT2A
E2F1	NCL
E2F1	PPIF
E2F1	PPP1R14B
E2F1	RNASEH2B
E2F1	SLC25A5
E2F1	SLC3A2
E2F1	SLC7A5
E2F1	SNRPD1
E2F1	SRSF7
E2F1	TESC
E2F1	TMSB10
E2F1	TRIM28
E2F1	VDAC1
E2F1	ATAD5
E2F1	CDC45
E2F1	CDT1
E2F1	CENPW
E2F1	CHAF1A
E2F1	DHFR
E2F1	DNMT1
E2F1	DTL
E2F1	DUT
E2F1	E2F1
E2F1	FANCI
E2F1	GINS2
E2F1	H2AFZ
E2F1	HELLS
E2F1	HIST1H4C
E2F1	HMGB2
E2F1	HMGN2
E2F1	LIG1
E2F1	MCM3
E2F1	MCM4
E2F1	MCM5
E2F1	MCM7
E2F1	MKI67
E2F1	MND1
E2F1	PCNA
E2F1	SMC2
E2F1	STMN1
E2F1	TUBA1B
E2F1	TUBB
E2F1	UHRF1
E2F1	ATAD2
E2F1	BRCA1
E2F1	CENPH
E2F1	TYMS
E2F1	FEN1
E2F1	BRCA2
E2F1	CCNB2
E2F1	CENPF
E2F1	CHEK1
E2F1	DEK
E2F1	HMGB1
E2F1	LMNB1
E2F1	NASP
E2F1	RRM1
E2F1	TMEM106C
E2F1	TPX2
E2F1	ZWINT
E2F1	UBE2T
E2F1	CASP8AP2
E2F1	CENPJ
E2F1	CENPM
E2F1	CTCF
E2F1	EPB41L2
E2F1	EZH2
E2F1	FAM111A
E2F1	FUS
E2F1	GMNN
E2F1	H2AFX
E2F1	HIST1H1E
E2F1	HMGXB4
E2F1	INSR
E2F1	MCM6
E2F1	NDC80
E2F1	NRGN
E2F1	PHGDH
E2F1	SMC4
E2F1	SVIP
E2F1	TAF3
E2F1	TMPO
E2F1	TOP2A
E2F1	USP1
E2F1	WEE1
E2F1	CARHSP1
E2F1	CEP152
E2F1	HIST1H1D
E2F1	MSH6
E2F1	PBRM1
E2F1	SMC1A
E2F1	CFL1
E2F1	CKAP2
E2F1	MMS22L
E2F1	C12orf75
E2F1	CDKN3
E2F1	CENPL
E2F1	CKS1B
E2F1	EIF4A3
E2F1	PRC1
E2F1	NUSAP1
YBX1	ACTB
YBX1	AURKB
YBX1	CALM2
YBX1	CALR
YBX1	CAT
YBX1	CCNB1
YBX1	CCNB2
YBX1	CDC45
YBX1	CDKN3
YBX1	CENPF
YBX1	CKS1B
YBX1	DBI
YBX1	DCTPP1
YBX1	DEK
YBX1	FLNA
YBX1	GINS2
YBX1	H2AFV
YBX1	H2AFZ
YBX1	HLTF
YBX1	HMGB1
YBX1	HMGB2
YBX1	HNRNPAB
YBX1	HSP90B1
YBX1	HSPA8
YBX1	LDHB
YBX1	MCM3
YBX1	MCM4
YBX1	MCM6
YBX1	MKI67
YBX1	MLEC
YBX1	MYH10
YBX1	NUCKS1
YBX1	OAZ1
YBX1	P4HB
YBX1	PDIA6
YBX1	PFN1
YBX1	PTTG1
YBX1	SRM
YBX1	SRSF3
YBX1	TOP2A
YBX1	TUBA1C
YBX1	TUBB
YBX1	UBB
YBX1	UBE2C
YBX1	UBE2S
YBX1	UBE2T
YBX1	UNG
YBX1	YBX1
YBX1	ANP32E
YBX1	ANXA1
YBX1	ATP1B3
YBX1	CDC20
YBX1	CEP152
YBX1	CHAF1A
YBX1	CKAP5
YBX1	CKS2
YBX1	CYCS
YBX1	DNAJC3
YBX1	EIF5A
YBX1	GLUL
YBX1	GPX4
YBX1	HMGB3
YBX1	HMGN3
YBX1	KIF20B
YBX1	KLF1
YBX1	KPNA2
YBX1	LMNB1
YBX1	MANF
YBX1	MCM5
YBX1	MTR
YBX1	ORC6
YBX1	PCNA
YBX1	PPIB
YBX1	PTMA
YBX1	RANBP1
YBX1	SDF2L1
YBX1	SET
YBX1	SNRPG
YBX1	TMPO
YBX1	USP1
YBX1	ZWINT
YBX1	CENPM
YBX1	FAM178B
YBX1	GATA1
YBX1	KCNH2
YBX1	TRIM28
YBX1	VDAC1
HMGB1	ACTB
HMGB1	ACTG1
HMGB1	AHCTF1
HMGB1	BCOR
HMGB1	BRD3
HMGB1	CALM1
HMGB1	CDK6
HMGB1	CDKN2AIP
HMGB1	CXXC5
HMGB1	DAAM1
HMGB1	DDX6
HMGB1	DYNLL2
HMGB1	FHL2
HMGB1	FLNA
HMGB1	GATA2
HMGB1	HMGA1
HMGB1	HMGB1
HMGB1	HMGB3
HMGB1	LMNB1
HMGB1	LMO4
HMGB1	MARCKSL1
HMGB1	MNT
HMGB1	P4HB
HMGB1	PHIP
HMGB1	POU2F1
HMGB1	PTP4A1
HMGB1	RANBP1
HMGB1	SMAD5
HMGB1	SRSF2
HMGB1	SRSF6
HMGB1	SYNC
HMGB1	WEE1
HMGB1	WTAP
HMGB1	ZBTB7A
HMGB1	ZEB2
E2F3	AFTPH
E2F3	ARHGAP21
E2F3	ATAD5
E2F3	BRCA2
E2F3	BRD3
E2F3	CCPG1
E2F3	CDC45
E2F3	CDK6
E2F3	CDT1
E2F3	CHAF1A
E2F3	CHEK1
E2F3	DENND4A
E2F3	DHFR
E2F3	DICER1
E2F3	DNMT1
E2F3	DTL
E2F3	DUT
E2F3	E2F1
E2F3	E2F3
E2F3	EZH2
E2F3	FADS2
E2F3	FAM76B
E2F3	FBXL20
E2F3	FNBP1L
E2F3	GINS2
E2F3	GMNN
E2F3	HELLS
E2F3	HIST1H4C
E2F3	IBTK
E2F3	KIAA0232
E2F3	KIT
E2F3	LCOR
E2F3	LCORL
E2F3	LIG1
E2F3	LIMD1
E2F3	MAML3
E2F3	MAPRE2
E2F3	MCM3
E2F3	MCM6
E2F3	MGA
E2F3	MKI67
E2F3	NUP50
E2F3	PBX1
E2F3	PHF20L1
E2F3	PHLPP1
E2F3	PPFIA1
E2F3	PPM1B
E2F3	PPP1R12A
E2F3	PRRC1
E2F3	RALGAPA2
E2F3	RAP2B
E2F3	RBPJ
E2F3	RNF168
E2F3	SIAH1
E2F3	SLC6A6
E2F3	SMC1A
E2F3	SMC2
E2F3	STAT5B
E2F3	STXBP5
E2F3	SVOPL
E2F3	TAB2
E2F3	TAL1
E2F3	THRB
E2F3	TMPO
E2F3	TOP1
E2F3	TUBB
E2F3	UBR4
E2F3	XPO1
E2F3	ZMYND11
E2F3	ZMYND8
E2F3	ARHGAP18
E2F3	ARIH2
E2F3	ASPSCR1
E2F3	ATAD2
E2F3	BRCA1
E2F3	CBFA2T3
E2F3	CENPJ
E2F3	CHERP
E2F3	CLK4
E2F3	CWC22
E2F3	DEK
E2F3	DNAJC9
E2F3	DYM
E2F3	FANCI
E2F3	FAR1
E2F3	FEM1B
E2F3	FKBP14
E2F3	GOLIM4
E2F3	GOSR1
E2F3	GTDC1
E2F3	HERC1
E2F3	HIST1H1E
E2F3	HIST2H2AC
E2F3	HMGXB4
E2F3	IKZF2
E2F3	IPO9
E2F3	LRP12
E2F3	MAN2A2
E2F3	MAP4K3
E2F3	MED12L
E2F3	MMS22L
E2F3	MND1
E2F3	MTR
E2F3	NLK
E2F3	NPAT
E2F3	NRGN
E2F3	OSBPL3
E2F3	PCNT
E2F3	PLEKHA5
E2F3	PLXNC1
E2F3	PNN
E2F3	PRC1
E2F3	PTPN12
E2F3	RANBP9
E2F3	RIOK3
E2F3	ROCK2
E2F3	SCYL2
E2F3	SERINC3
E2F3	SESN3
E2F3	SET
E2F3	SLC39A8
E2F3	SLMAP
E2F3	SMARCE1
E2F3	SMOX
E2F3	SNX5
E2F3	SPTLC2
E2F3	SSX2IP
E2F3	STAM
E2F3	TERF1
E2F3	TMEM159
E2F3	TNIK
E2F3	TPST2
E2F3	TRIM24
E2F3	TRIP11
E2F3	TSPYL4
E2F3	TTBK2
E2F3	TTC21B
E2F3	TYMS
E2F3	UBE4B
E2F3	UBN2
E2F3	UBXN2A
E2F3	UBXN7
E2F3	USP42
E2F3	VCL
E2F3	ZBTB16
E2F3	ZC3H13
E2F3	ZC3H7A
E2F3	ZCCHC2
E2F3	ZNF117
E2F3	ZNF24
E2F3	ZNF704
E2F3	ZWINT
E2F3	ALG10B
E2F3	ATP2C1
E2F3	CCDC88A
E2F3	CKS1B
E2F3	COPA
E2F3	DCP1A
E2F3	DSE
E2F3	MBTD1
E2F3	MON2
E2F3	NUSAP1
E2F3	PANK3
E2F3	PHTF1
E2F3	POLR2J3
E2F3	TBC1D23
E2F3	USP47
E2F3	YOD1
E2F3	ZBTB4
E2F3	ZNF431
E2F3	BMP2K
E2F3	FEN1
E2F3	TLN1
E2F3	CENPM
E2F3	RNF44
E2F3	ZNF37A
E2F3	HIPK2
E2F3	KCNQ1OT1
E2F3	MAX
E2F3	SLC12A6
E2F3	SOS1
E2F3	TPX2
E2F3	TRIM13
E2F3	UBE2C
E2F3	ZNF33B
E2F3	TMEM106C
E2F3	ATP1B1
E2F3	NUCKS1
E2F3	SHPRH
E2F3	WDR48
E2F3	CAPN7
E2F3	MIB1
E2F3	SPN
E2F3	ZNF33A
E2F3	HIPK1
E2F3	2002-03-01
E2F3	SCD
E2F3	TOP2A
E2F3	C1orf131
E2F3	CCDC14
E2F3	SLA
E2F3	ENG
E2F3	USP14
E2F3	ZNF512B
E2F3	CCDC34
E2F3	KPNA6
E2F3	LIG3
E2F3	NXF1
E2F3	PHACTR4
E2F3	ZNF738
E2F3	SNAP23
E2F3	ORC6
E2F3	TMED8
E2F3	ABCA5
E2F3	ABCC1
E2F3	ACTB
E2F3	ACTG1
E2F3	ADAM15
E2F3	ADAM9
E2F3	AFF1
E2F3	AGL
E2F3	AGTPBP1
E2F3	ANKRD13A
E2F3	ANKS1A
E2F3	ANP32E
E2F3	APC
E2F3	ARHGAP5
E2F3	ARIH1
E2F3	ARL5B
E2F3	ARMCX3
E2F3	ARRDC3
E2F3	ASH1L
E2F3	ATF2
E2F3	ATF4
E2F3	ATF5
E2F3	ATF7IP
E2F3	ATG2A
E2F3	ATP1B3
E2F3	ATXN1
E2F3	AURKB
E2F3	AZIN1
E2F3	B3GNT2
E2F3	BAG5
E2F3	BCL2
E2F3	BCLAF1
E2F3	BRD2
E2F3	BRWD1
E2F3	BSDC1
E2F3	BTBD7
E2F3	BTG3
E2F3	C11orf54
E2F3	C12orf65
E2F3	C12orf75
E2F3	C3orf38
E2F3	CACYBP
E2F3	CALR
E2F3	CARHSP1
E2F3	CASK
E2F3	CASP8AP2
E2F3	CBLL1
E2F3	CCAR1
E2F3	CCDC69
E2F3	CCDC93
E2F3	CCM2
E2F3	CCNB2
E2F3	CCNT2
E2F3	CD151
E2F3	CD63
E2F3	CD82
E2F3	CDC14A
E2F3	CDCA7
E2F3	CDK11A
E2F3	CDK2AP2
E2F3	CDKN2AIP
E2F3	CEBPA
E2F3	CELF1
E2F3	CENPF
E2F3	CENPW
E2F3	CEP152
E2F3	CEPT1
E2F3	CHD3
E2F3	CHD8
E2F3	CHIC2
E2F3	CHMP4B
E2F3	CHST11
E2F3	CHST12
E2F3	CIZ1
E2F3	CKB
E2F3	CKS2
E2F3	CLPX
E2F3	CNOT4
E2F3	CORO1C
E2F3	COX17
E2F3	CREB3
E2F3	CREB5
E2F3	CRK
E2F3	CRTC3
E2F3	CTBP2
E2F3	CTCF
E2F3	CTDSP2
E2F3	CTNNBL1
E2F3	CYCS
E2F3	DAAM1
E2F3	DACH1
E2F3	DAD1
E2F3	DAPK1
E2F3	DBF4
E2F3	DBI
E2F3	DBN1
E2F3	DCTPP1
E2F3	DCUN1D4
E2F3	DDB1
E2F3	DDX20
E2F3	DHRS1
E2F3	DHX36
E2F3	DIP2B
E2F3	DLEU2
E2F3	DLGAP4
E2F3	DNAJA1
E2F3	DNASE2
E2F3	DOCK7
E2F3	DSTYK
E2F3	DYRK1A
E2F3	EAPP
E2F3	EIF4A1
E2F3	EIF4A3
E2F3	EIF5A
E2F3	ELMO1
E2F3	ENTPD4
E2F3	ESCO1
E2F3	ETS2
E2F3	EXOC6
E2F3	FADS3
E2F3	FAM102B
E2F3	FAM111A
E2F3	FAM13A
E2F3	FAM13B
E2F3	FAM161A
E2F3	FBXL4
E2F3	FBXO42
E2F3	FBXO7
E2F3	FBXO9
E2F3	FBXW9
E2F3	FERMT3
E2F3	FKBP11
E2F3	FMR1
E2F3	FNDC3A
E2F3	FNDC3B
E2F3	FNIP2
E2F3	FOXO3
E2F3	GADD45G
E2F3	GAPDH
E2F3	GATA2
E2F3	GGA2
E2F3	GLS
E2F3	GLUL
E2F3	GNAI1
E2F3	GNAS
E2F3	GOLGA4
E2F3	GOLGB1
E2F3	GPATCH8
E2F3	GPM6B
E2F3	GPX4
E2F3	H1FX
E2F3	H2AFV
E2F3	H2AFX
E2F3	H2AFY
E2F3	HAGHL
E2F3	HIST1H1C
E2F3	HIST1H2BN
E2F3	HMGA1
E2F3	HMGB1
E2F3	HMGB2
E2F3	HMGCR
E2F3	HMGN3
E2F3	HNRNPA2B1
E2F3	HNRNPAB
E2F3	HNRNPF
E2F3	HNRNPH1
E2F3	HNRNPU
E2F3	HOXA10
E2F3	HOXA9
E2F3	HSP90AA1
E2F3	HSPA5
E2F3	HSPA8
E2F3	HSPH1
E2F3	IFNAR1
E2F3	IGFBP2
E2F3	ING1
E2F3	ING3
E2F3	INO80
E2F3	INSIG2
E2F3	IP6K1
E2F3	IVNS1ABP
E2F3	IWS1
E2F3	JOSD1
E2F3	KBTBD2
E2F3	KCTD9
E2F3	KDM3B
E2F3	KIAA0040
E2F3	KIF13A
E2F3	KIF1B
E2F3	KPNA5
E2F3	LEF1
E2F3	LEMD2
E2F3	LMF1
E2F3	LMO2
E2F3	LNPEP
E2F3	LRRC58
E2F3	LZTFL1
E2F3	MAN2A1
E2F3	MANF
E2F3	MAP2K3
E2F3	MAP3K12
E2F3	MARCKS
E2F3	MARCKSL1
E2F3	MAT2A
E2F3	MBD4
E2F3	MCM4
E2F3	MCM5
E2F3	MCM7
E2F3	MDM2
E2F3	MED17
E2F3	MED23
E2F3	MED26
E2F3	MEX3C
E2F3	MFSD11
E2F3	MGLL
E2F3	MLEC
E2F3	MLLT10
E2F3	MNT
E2F3	MPRIP
E2F3	MSL3
E2F3	MTMR10
E2F3	MTMR4
E2F3	MTRNR2L8
E2F3	MXD1
E2F3	MYC
E2F3	MYH10
E2F3	MYL6
E2F3	MYO9A
E2F3	NARF
E2F3	NAT9
E2F3	NCL
E2F3	NCOR2
E2F3	NEDD4L
E2F3	NF1
E2F3	NFATC2IP
E2F3	NFIA
E2F3	NFKB1
E2F3	NGDN
E2F3	NHLRC2
E2F3	NME1
E2F3	NOL8
E2F3	NOLC1
E2F3	NPEPPS
E2F3	NPM1
E2F3	NR4A3
E2F3	NSD1
E2F3	NUCB2
E2F3	NUDT4
E2F3	NUP153
E2F3	OAZ1
E2F3	P4HB
E2F3	PA2G4
E2F3	PCNA
E2F3	PDE4D
E2F3	PDS5B
E2F3	PDZD8
E2F3	PEX16
E2F3	PFN1
E2F3	PGAM1
E2F3	PGM2L1
E2F3	PHIP
E2F3	PIGA
E2F3	PILRB
E2F3	PIP5K1A
E2F3	PLAGL1
E2F3	PLEKHF2
E2F3	POLB
E2F3	POLR3E
E2F3	POU2F1
E2F3	PPIA
E2F3	PPM1A
E2F3	PPP1R9B
E2F3	PPP2R5A
E2F3	PRKAR2B
E2F3	PRKDC
E2F3	PTAR1
E2F3	PTGR2
E2F3	PTP4A2
E2F3	PVT1
E2F3	RAB33A
E2F3	RAB6A
E2F3	RANBP1
E2F3	RAP1B
E2F3	RASSF5
E2F3	RELA
E2F3	RELT
E2F3	REST
E2F3	RIF1
E2F3	RLF
E2F3	RNF13
E2F3	RPGR
E2F3	RPRD2
E2F3	RPS27L
E2F3	RPS6KA3
E2F3	RPS6KA5
E2F3	RSBN1
E2F3	RSRC2
E2F3	RTN4
E2F3	RUFY1
E2F3	RUNX2
E2F3	SAR1A
E2F3	SARNP
E2F3	SCLT1
E2F3	SEC23A
E2F3	SENP2
E2F3	SERBP1
E2F3	SERPINB9
E2F3	SERPINE2
E2F3	SFSWAP
E2F3	SH2B3
E2F3	SIDT2
E2F3	SLBP
E2F3	SLC12A2
E2F3	SLC20A1
E2F3	SLC25A42
E2F3	SLC27A2
E2F3	SLC35A2
E2F3	SLC39A10
E2F3	SLC3A2
E2F3	SLC40A1
E2F3	SLC44A1
E2F3	SLC5A3
E2F3	SLC7A5
E2F3	SLC9A3R1
E2F3	SMARCA1
E2F3	SMARCA4
E2F3	SMARCC2
E2F3	SMC4
E2F3	SMG1
E2F3	SNX13
E2F3	SOX4
E2F3	SQLE
E2F3	SREBF2
E2F3	SREK1
E2F3	SRSF2
E2F3	SRSF3
E2F3	ST8SIA6
E2F3	STRN3
E2F3	SUPV3L1
E2F3	SYNC
E2F3	SYNRG
E2F3	SYS1
E2F3	TACC3
E2F3	TAF1
E2F3	TAF1D
E2F3	TAF3
E2F3	TAF4B
E2F3	TAF8
E2F3	TAOK1
E2F3	TAPT1
E2F3	TBC1D20
E2F3	TBC1D5
E2F3	TBXAS1
E2F3	TET2
E2F3	TFRC
E2F3	TLE3
E2F3	TMEM170A
E2F3	TMEM65
E2F3	TNPO2
E2F3	TNRC18
E2F3	TNRC6A
E2F3	TOB2
E2F3	TOR1AIP2
E2F3	TOX
E2F3	TP53BP1
E2F3	TPI1
E2F3	TRAPPC10
E2F3	TRIM33
E2F3	TRIO
E2F3	TRPM7
E2F3	TSC1
E2F3	TTL
E2F3	UBB
E2F3	UBE2F
E2F3	UBE2S
E2F3	UBE2T
E2F3	UBE2W
E2F3	UHRF1
E2F3	UHRF2
E2F3	UNG
E2F3	UNK
E2F3	UQCR10
E2F3	USP1
E2F3	USP24
E2F3	USP38
E2F3	UVRAG
E2F3	VAMP8
E2F3	VAT1
E2F3	VEZT
E2F3	VOPP1
E2F3	VPS37B
E2F3	VPS53
E2F3	WDFY2
E2F3	WEE1
E2F3	WNK1
E2F3	YES1
E2F3	YTHDC2
E2F3	YTHDF2
E2F3	YTHDF3
E2F3	ZBTB11
E2F3	ZBTB43
E2F3	ZCCHC3
E2F3	ZFP91
E2F3	ZMIZ1
E2F3	ZMYM2
E2F3	ZMYM5
E2F3	ZNF141
E2F3	ZNF292
E2F3	ZNF605
E2F3	ZNF644
E2F3	ZNF654
E2F3	ZNF655
E2F3	ZNF711
E2F3	ZSWIM6
E2F3	KCTD20
E2F3	AHR
E2F3	QPRT
E2F3	ZNF326
ATF4	ATF3
ATF4	ATF5
ATF4	CALCRL
ATF4	CDKN1A
ATF4	CEBPG
ATF4	CLIC4
ATF4	CREM
ATF4	DDIT3
ATF4	EIF1
ATF4	HSPA8
ATF4	ITGA5
ATF4	RAP2C
ATF4	RRBP1
ATF4	SDCBP
ATF4	SERPINH1
ATF4	SIAH1
ATF4	WARS
ATF4	CD200
ATF4	CDC42EP3
ATF4	GNAS
ATF4	IGFBP7
ATF4	ITGB1
ATF4	KLF4
ATF4	LYSMD3
ATF4	NFE2L2
ATF4	PPP2R5A
ATF4	PRNP
ATF4	SKIL
ATF4	SLC20A1
ATF4	SPTAN1
ATF4	TIMP3
ATF4	VIM
ATF4	YPEL2
ATF4	CTDSP2
ATF4	FHL1
ATF4	HHEX
ATF4	IDH1
ATF4	ACTB
ATF4	ACTG1
ATF4	AGTPBP1
ATF4	AHCTF1
ATF4	AHDC1
ATF4	ARHGAP21
ATF4	ARID3A
ATF4	ARL4C
ATF4	ATF7IP
ATF4	ATP1B1
ATF4	AUTS2
ATF4	AZIN1
ATF4	BAHCC1
ATF4	BCL2
ATF4	BCOR
ATF4	BRD3
ATF4	BTG1
ATF4	BTK
ATF4	CALM1
ATF4	CBX4
ATF4	CCNG2
ATF4	CDC42SE1
ATF4	CDK17
ATF4	CDK6
ATF4	CDKN1C
ATF4	CDKN2AIP
ATF4	CHAF1A
ATF4	CHD3
ATF4	CHST11
ATF4	CIC
ATF4	CKAP5
ATF4	CREBBP
ATF4	CSNK1E
ATF4	CSNK1G3
ATF4	CTBP2
ATF4	CXXC5
ATF4	DAAM1
ATF4	DEK
ATF4	DENND4A
ATF4	DUSP6
ATF4	DYRK1A
ATF4	DYRK2
ATF4	E2F3
ATF4	EIF5
ATF4	ELK4
ATF4	FAM78A
ATF4	FBXO3
ATF4	FHL2
ATF4	FLNA
ATF4	FOSB
ATF4	FOXO3
ATF4	FOXP1
ATF4	FSTL1
ATF4	GATA2
ATF4	GLG1
ATF4	GRASP
ATF4	HBP1
ATF4	HERC1
ATF4	HIC2
ATF4	HIPK1
ATF4	HMGA1
ATF4	HMGB1
ATF4	HMGB3
ATF4	HNRNPA2B1
ATF4	HNRNPH1
ATF4	HNRNPU
ATF4	IGF1R
ATF4	IKZF2
ATF4	ING1
ATF4	IRF1
ATF4	IRS2
ATF4	JUND
ATF4	KDM6A
ATF4	KDM6B
ATF4	KIAA0232
ATF4	KLF3
ATF4	KLF6
ATF4	LCOR
ATF4	LCORL
ATF4	LMNB1
ATF4	LMO4
ATF4	LONRF1
ATF4	LRP5L
ATF4	LUZP1
ATF4	MAP2K3
ATF4	MARCKSL1
ATF4	METRNL
ATF4	MGAT4A
ATF4	MID1IP1
ATF4	MIDN
ATF4	MLLT10
ATF4	MNT
ATF4	MSL1
ATF4	MXD4
ATF4	MXI1
ATF4	NFATC1
ATF4	NFIL3
ATF4	NIN
ATF4	NR1D2
ATF4	NR3C1
ATF4	NUDT4
ATF4	PAN3
ATF4	PDE4D
ATF4	PDS5B
ATF4	PELI2
ATF4	PHF12
ATF4	PHIP
ATF4	PHLPP1
ATF4	PIAS1
ATF4	PLXNC1
ATF4	POU2F1
ATF4	PRDM2
ATF4	PTP4A1
ATF4	RAB6A
ATF4	RARA
ATF4	RB1
ATF4	RELT
ATF4	REST
ATF4	REV3L
ATF4	RFX3
ATF4	RNF44
ATF4	RPS6KA3
ATF4	RREB1
ATF4	RUNX3
ATF4	SFMBT2
ATF4	SH2B3
ATF4	SH3BP2
ATF4	SLC12A6
ATF4	SLC38A2
ATF4	SMAD3
ATF4	STIM2
ATF4	TAF4B
ATF4	TAL1
ATF4	TGFBR1
ATF4	TLE3
ATF4	TLE4
ATF4	TOB2
ATF4	TOP1
ATF4	TRIO
ATF4	UBASH3B
ATF4	UBB
ATF4	UBL3
ATF4	VGLL4
ATF4	WEE1
ATF4	ZADH2
ATF4	ZBTB1
ATF4	ZBTB7A
ATF4	ZC3H12A
ATF4	ZC3H4
ATF4	ZEB2
ATF4	ZFPM1
ATF4	ZFX
ATF4	ZMIZ1
ATF4	ZMYND11
ATF4	ZNF281
ATF4	ZNF292
ATF4	ZNF605
ATF4	ZNF800
ATF4	ZSWIM6
SMARCA4	AUTS2
SMARCA4	BACH2
SMARCA4	BCLAF1
SMARCA4	CD9
SMARCA4	CDK9
SMARCA4	DBN1
SMARCA4	EDEM1
SMARCA4	EZH2
SMARCA4	EZR
SMARCA4	FHIT
SMARCA4	H1FX
SMARCA4	HMGB1
SMARCA4	HNRNPH1
SMARCA4	INO80D
SMARCA4	IRS2
SMARCA4	MDM2
SMARCA4	MYB
SMARCA4	NIPBL
SMARCA4	NUP153
SMARCA4	PCM1
SMARCA4	PPP1R14B
SMARCA4	PTMA
SMARCA4	RREB1
SMARCA4	RTN4
SMARCA4	SRSF3
SMARCA4	SYVN1
SMARCA4	TCF3
SMARCA4	TOP2B
SMARCA4	TP53INP1
SMARCA4	TSPAN14
SMARCA4	UBR5
SMARCA4	UBXN7
SMARCA4	UHRF1
SMARCA4	VDAC1
EZH2	ABCA5
EZH2	ABHD5
EZH2	ABO
EZH2	ACAP3
EZH2	ACSL1
EZH2	ACSL3
EZH2	ACTB
EZH2	ACTG1
EZH2	ACTN1
EZH2	ADA
EZH2	ADAM10
EZH2	ADAM15
EZH2	ADAM17
EZH2	ADD1
EZH2	AFTPH
EZH2	AGFG1
EZH2	AGPAT5
EZH2	AGTPBP1
EZH2	AHCTF1
EZH2	AHDC1
EZH2	AKAP10
EZH2	AKAP11
EZH2	AKIRIN2
EZH2	AKT2
EZH2	AMD1
EZH2	ANKLE2
EZH2	ANKRD10
EZH2	ANKS1A
EZH2	ANP32E
EZH2	APLP2
EZH2	ARFGEF1
EZH2	ARHGAP21
EZH2	ARHGAP5
EZH2	ARHGEF7
EZH2	ARID2
EZH2	ARID3A
EZH2	ARID4A
EZH2	ARID4B
EZH2	ARIH1
EZH2	ARL4A
EZH2	ARL5B
EZH2	ARMC8
EZH2	ARRDC3
EZH2	ASH1L
EZH2	ASPSCR1
EZH2	ASXL1
EZH2	ATAD2B
EZH2	ATP11B
EZH2	ATP1B3
EZH2	ATP2A3
EZH2	ATP2C1
EZH2	ATP6V0A1
EZH2	ATP8A1
EZH2	ATP9B
EZH2	ATXN1L
EZH2	AUTS2
EZH2	AZIN1
EZH2	B4GALT1
EZH2	BACH1
EZH2	BACH2
EZH2	BAG5
EZH2	BAHCC1
EZH2	BAZ1A
EZH2	BAZ2A
EZH2	BCL2
EZH2	BCOR
EZH2	BCR
EZH2	BLVRB
EZH2	BMP2K
EZH2	BRAF
EZH2	BRD1
EZH2	BRD3
EZH2	BRI3BP
EZH2	BRWD1
EZH2	BTAF1
EZH2	BTBD3
EZH2	BTG3
EZH2	C12orf75
EZH2	C16orf72
EZH2	C1GALT1
EZH2	C3orf38
EZH2	C6orf62
EZH2	C9orf72
EZH2	CALM1
EZH2	CALM2
EZH2	CALR
EZH2	CAPN7
EZH2	CARHSP1
EZH2	CASD1
EZH2	CASK
EZH2	CBFA2T3
EZH2	CBL
EZH2	CBLB
EZH2	CBX4
EZH2	CCAR1
EZH2	CCDC18
EZH2	CCDC6
EZH2	CCDC88A
EZH2	CCDC88C
EZH2	CCM2
EZH2	CCNG2
EZH2	CCNT2
EZH2	CD2AP
EZH2	CD47
EZH2	CD55
EZH2	CD81
EZH2	CDC14A
EZH2	CDC42BPA
EZH2	CDC42EP3
EZH2	CDK13
EZH2	CDK17
EZH2	CDK2AP2
EZH2	CDK6
EZH2	CDKN2AIP
EZH2	CDYL
EZH2	CEBPG
EZH2	CELF1
EZH2	CENPF
[truncated: 10,019 more rows]

## Sheet: Supplemental Table S6
List of regulons altered in LGA
Regulon	Average activity difference	p-value	adjusted p-value	associated genes
ARID5A	-0.0557316	4.27951e-57	1.06988e-54	VAMP2	ARID5A	DUSP1	DUSP6	FOS	FOSB	GADD45B	IRF1	JUNB	JUND	KLF2	KLF4	KLF6	MIDN	PIM1	SOCS3	UBL3	YPEL5	ZEB1	BHLHE40	EGR1	TBCC	ZADH2	ZCCHC3
KLF10	-0.0320776	4.32328e-56	1.08082e-53	FOSB	JUNB	MEPCE	ATP1B1	DUSP2	EGR1	FOS	GNL1	IER2	IER3	JUN	MAFF	MAP9	NFKBIZ	NSUN6	PNP	PRDM8	PTCH2	RAP1A	SOCS3	TSC22D2	ZFP36	ZNF667	IDS	KLF4	TUBA1A
EGR1	-0.0562117	6.30842e-54	1.5771e-51	ATF3	BHLHE40	CDKN1A	DUSP1	EIF5	GADD45B	HSPA5	IFRD1	JUNB	LMNA	MIDN	PIM1	SERTAD1	UBC	YRDC	ZFP36	CCNL1	DUSP2	FOS	FOSB	IER2	JUN	JUND	KLF6	MAFF	PPP1R10	PPP1R15A	TSC22D2	TACC1	CD44	EGR1	MCL1	MEPCE	TIPARP	TUBA1A	DUSP6	KLF4	ARID5A	CITED2	DNAJB1	EPS8	IER3	IRF1	SRSF7	ANKRD28	CIRBP
FOSB	-0.0562528	3.06854e-50	7.67136e-48	ARID5A	ATF3	BRD2	C6orf62	CCNG2	CDKN1A	CDKN1C	CITED2	CLK3	CTNNB1	DNAJA1	DNAJB2	DYNLL2	EIF1	EIF5	EPS8	FOSB	GADD45B	GRASP	HES1	HYAL2	ID1	ID2	IER5	KLF10	LMNA	MIDN	MYADM	NDRG1	NFATC1	NFE2L2	PHACTR2	PRNP	SERTAD1	SERTAD3	SKIL	SOCS1	TACC1	TGIF1	TRIM41	WSB1	ZC3H12A
KLF4	-0.0446609	2.57441e-48	6.43602e-46	AHNAK	AKAP13	ARF6	ARID5A	ARL4C	ARRDC2	ATF3	ATF4	BRD2	BTG1	CALM1	CCNG2	CD151	CDKN1A	CITED2	CNN3	CXCR4	DDIT4	DDX3X	DNAJA1	DNAJB1	DNAJB9	DUSP1	EGR1	EIF1	ETS1	EZR	GADD45B	GRASP	HEXIM1	HLA-C	HLA-E	HNRNPUL1	HSPA1A	HSPA1B	HSPB1	ID1	ID2	ID3	IER2	IER3	IL6ST	INTS6	ITM2B	JUN	JUNB
KLF2	-0.0381624	2.04441e-46	5.11102e-44	ARID5A	EIF1	EIF5	FOSB	IER2	JUNB	JUND	MAFF	NFKBIZ	SRSF7	ATF3	BHLHE40	CREB5	DUSP1	ELF1	ETS2	GADD45B	H3F3B	IFRD1	KLF6	PIM1	SERTAD1	UBC	ZFP36	HSPA5	BTG3	CXCL2	DDIT3	IER3	IRF1	ZFAND5	ABHD5	BCAS2	CCNL1	CHMP1B	CITED2	COQ7	CYCS	DNAJB1	DUSP10	FOS	GNL1	JUN	PPP1R15A	TCF7	TSC22D2
JUN	-0.0361282	3.10097e-39	7.75242e-37	APP	ARF6	ARID5A	ATF3	ATF5	ATXN7L3B	BCL3	BHLHE40	BRD2	C6orf62	CALM1	CD151	CD81	CDKN1A	CDKN1C	CIC	CIRBP	CITED2	CPNE2	CSRNP1	DDIT4	DNAJA1	EGFL7	EIF1	EIF4A2	ELK3	EPS8	ESAM	FAM89A	FKBP1A	FOSB	FSTL1	GADD45B	HES1	HEXIM1	HSPB1	ID1	ID2	ID3	IER2	IER3	IER5	IER5L	INTS6	IRF1	ITGA5
[truncated: 69 more columns]

## Sheet: Supplemental Table S7
Regulons activity per lineage
regulon	lineage	activity	top10regulon	top30regulon
POU2F2	B cell	0.502332109903848	TRUE	TRUE
CHD2	B cell	0.461040126859098	TRUE	TRUE
CHD1	B cell	0.422170562508216	TRUE	TRUE
REL	B cell	0.412659330087479	TRUE	TRUE
SF1	B cell	0.369839274662312	TRUE	TRUE
FOSB	B cell	0.345222359210232	TRUE	TRUE
JUND	B cell	0.340453528689688	TRUE	TRUE
ARID5A	B cell	0.315971795047105	TRUE	TRUE
KLF6	B cell	0.309181969757854	TRUE	TRUE
KLF2	B cell	0.292851870939318	TRUE	TRUE
IRF8	B cell	0.263844726775624	FALSE	TRUE
SMAD3	B cell	0.257310400895359	FALSE	TRUE
NR3C1	B cell	0.254321733562598	FALSE	TRUE
BCLAF1	B cell	0.250707374560648	FALSE	TRUE
JUN	B cell	0.240992381971484	FALSE	TRUE
SMARCA4	B cell	0.239886156102979	FALSE	TRUE
BCL11A	B cell	0.238365634614054	FALSE	TRUE
FOXP1	B cell	0.23018531318112	FALSE	TRUE
NFKB2	B cell	0.229443168940132	FALSE	TRUE
JUNB	B cell	0.211877190984763	FALSE	TRUE
HMGB1	B cell	0.210754400467932	FALSE	TRUE
XBP1	B cell	0.209882924698842	FALSE	TRUE
IRF1	B cell	0.209237486207671	FALSE	TRUE
EGR1	B cell	0.207975895520074	FALSE	TRUE
ETS1	B cell	0.205977015724678	FALSE	TRUE
CREB1	B cell	0.205684530376907	FALSE	TRUE
MAZ	B cell	0.204968531634549	FALSE	TRUE
TAF1	B cell	0.198348059400422	FALSE	TRUE
KDM5A	B cell	0.196285462149902	FALSE	TRUE
FOS	B cell	0.195153947130612	FALSE	TRUE
FOSB	DC	0.513821534614532	TRUE	TRUE
KLF13	DC	0.498630954784518	TRUE	TRUE
RARA	DC	0.43389360785421	TRUE	TRUE
ARID5A	DC	0.424306495580455	TRUE	TRUE
CHD1	DC	0.394156146315633	TRUE	TRUE
CHD2	DC	0.37953241622036	TRUE	TRUE
JUND	DC	0.362321202720432	TRUE	TRUE
KLF2	DC	0.359942154731665	TRUE	TRUE
POU2F2	DC	0.339937642133967	TRUE	TRUE
EGR1	DC	0.3361603852518	TRUE	TRUE
JUNB	DC	0.334231004117546	FALSE	TRUE
RXRA	DC	0.327337705124263	FALSE	TRUE
CREM	DC	0.3254118461925	FALSE	TRUE
REL	DC	0.318133296619168	FALSE	TRUE
SPI1	DC	0.317519390073451	FALSE	TRUE
KLF6	DC	0.309771882099935	FALSE	TRUE
JUN	DC	0.308059871017881	FALSE	TRUE
FOS	DC	0.297852215524352	FALSE	TRUE
ELF1	DC	0.2948149211201	FALSE	TRUE
SMAD3	DC	0.294037529447875	FALSE	TRUE
KLF10	DC	0.292064367962795	FALSE	TRUE
SF1	DC	0.290981610882401	FALSE	TRUE
KLF4	DC	0.285878055996841	FALSE	TRUE
ATF3	DC	0.284256738003207	FALSE	TRUE
MAZ	DC	0.283099075000066	FALSE	TRUE
IRF7	DC	0.276510175067146	FALSE	TRUE
HMGB1	DC	0.274444809546429	FALSE	TRUE
NFKB2	DC	0.272291969461353	FALSE	TRUE
NR3C1	DC	0.259032980905478	FALSE	TRUE
IRF8	DC	0.23980630751871	FALSE	TRUE
YBX1	Erythro-Mas	0.444209849716068	TRUE	TRUE
HMGB1	Erythro-Mas	0.374769004233946	TRUE	TRUE
E2F1	Erythro-Mas	0.363127982031049	TRUE	TRUE
CHD1	Erythro-Mas	0.359489705233701	TRUE	TRUE
FOSB	Erythro-Mas	0.341774753694964	TRUE	TRUE
MAZ	Erythro-Mas	0.31532198120615	TRUE	TRUE
MYC	Erythro-Mas	0.296136087790826	TRUE	TRUE
SMARCA4	Erythro-Mas	0.295366149461615	TRUE	TRUE
MYB	Erythro-Mas	0.262007645038311	TRUE	TRUE
BCLAF1	Erythro-Mas	0.260161587694579	TRUE	TRUE
GATA2	Erythro-Mas	0.258411105707402	FALSE	TRUE
JUND	Erythro-Mas	0.25713904054387	FALSE	TRUE
GATA1	Erythro-Mas	0.242043773694043	FALSE	TRUE
SF1	Erythro-Mas	0.232834503861753	FALSE	TRUE
JUN	Erythro-Mas	0.227580609632268	FALSE	TRUE
BRCA1	Erythro-Mas	0.22668131328311	FALSE	TRUE
KLF2	Erythro-Mas	0.208098264490054	FALSE	TRUE
FOS	Erythro-Mas	0.206960928701458	FALSE	TRUE
ARID5A	Erythro-Mas	0.206342586017075	FALSE	TRUE
TAL1	Erythro-Mas	0.20525798462186	FALSE	TRUE
CHD2	Erythro-Mas	0.202773336104335	FALSE	TRUE
ELF1	Erythro-Mas	0.200402570608771	FALSE	TRUE
DDIT3	Erythro-Mas	0.199739591829081	FALSE	TRUE
EGR1	Erythro-Mas	0.189383700603585	FALSE	TRUE
KLF6	Erythro-Mas	0.189007570636121	FALSE	TRUE
E2F3	Erythro-Mas	0.185824477597353	FALSE	TRUE
FOSL2	Erythro-Mas	0.183256456987763	FALSE	TRUE
BCL11A	Erythro-Mas	0.176920011749317	FALSE	TRUE
ATF3	Erythro-Mas	0.17402422515597	FALSE	TRUE
NR3C1	Erythro-Mas	0.173445205135378	FALSE	TRUE
FOSB	HSC	0.635921094703793	TRUE	TRUE
ARID5A	HSC	0.491154454857067	TRUE	TRUE
EGR1	HSC	0.460206502411786	TRUE	TRUE
CHD1	HSC	0.451670316508482	TRUE	TRUE
JUND	HSC	0.409992448482351	TRUE	TRUE
FOSL2	HSC	0.404168710164612	TRUE	TRUE
JUN	HSC	0.401763325236139	TRUE	TRUE
KLF2	HSC	0.394254207817414	TRUE	TRUE
FOS	HSC	0.355740565754429	TRUE	TRUE
CEBPB	HSC	0.350562208400497	TRUE	TRUE
SF1	HSC	0.325063424997743	FALSE	TRUE
ELF1	HSC	0.315876631337492	FALSE	TRUE
KLF10	HSC	0.31549411224005	FALSE	TRUE
KLF6	HSC	0.307906188778962	FALSE	TRUE
ATF3	HSC	0.293377555566799	FALSE	TRUE
DDIT3	HSC	0.29030910357678	FALSE	TRUE
STAT3	HSC	0.284719993988912	FALSE	TRUE
HMGB1	HSC	0.275504993499788	FALSE	TRUE
CHD2	HSC	0.269258903253307	FALSE	TRUE
JUNB	HSC	0.267129077158822	FALSE	TRUE
YBX1	HSC	0.266617116494731	FALSE	TRUE
MAZ	HSC	0.266520378701042	FALSE	TRUE
NR3C1	HSC	0.264948069234614	FALSE	TRUE
BCLAF1	HSC	0.260089643420481	FALSE	TRUE
SMARCA4	HSC	0.2597654645678	FALSE	TRUE
XBP1	HSC	0.258262425423553	FALSE	TRUE
RUNX1	HSC	0.256999268665078	FALSE	TRUE
BCL11A	HSC	0.254946269989523	FALSE	TRUE
HMGA2	HSC	0.249488758039662	FALSE	TRUE
HOXB2	HSC	0.248385375000214	FALSE	TRUE
FOSB	LT-HSC	0.477579008097724	TRUE	TRUE
FOSL2	LT-HSC	0.416974447366208	TRUE	TRUE
CEBPB	LT-HSC	0.391761663557805	TRUE	TRUE
CHD1	LT-HSC	0.370935861274496	TRUE	TRUE
KLF2	LT-HSC	0.353909174595728	TRUE	TRUE
EGR1	LT-HSC	0.346341801255154	TRUE	TRUE
ARID5A	LT-HSC	0.342249444610434	TRUE	TRUE
JUND	LT-HSC	0.332056799909238	TRUE	TRUE
HOXB2	LT-HSC	0.315325680566522	TRUE	TRUE
JUN	LT-HSC	0.311658453458567	TRUE	TRUE
KLF10	LT-HSC	0.292775004519933	FALSE	TRUE
SF1	LT-HSC	0.29107239562264	FALSE	TRUE
ELF1	LT-HSC	0.288888755671552	FALSE	TRUE
HMGA2	LT-HSC	0.281365002670823	FALSE	TRUE
YBX1	LT-HSC	0.274380342519683	FALSE	TRUE
FOS	LT-HSC	0.272510686046663	FALSE	TRUE
ATF3	LT-HSC	0.264282761596289	FALSE	TRUE
MAZ	LT-HSC	0.255203334648262	FALSE	TRUE
HMGB1	LT-HSC	0.251573488911107	FALSE	TRUE
E2F1	LT-HSC	0.244177142989466	FALSE	TRUE
BCL11A	LT-HSC	0.232872331727095	FALSE	TRUE
HOXA6	LT-HSC	0.232785068145775	FALSE	TRUE
STAT3	LT-HSC	0.231432287595116	FALSE	TRUE
NR3C1	LT-HSC	0.228391812366781	FALSE	TRUE
XBP1	LT-HSC	0.223738301808144	FALSE	TRUE
SMARCA4	LT-HSC	0.223553069585949	FALSE	TRUE
JUNB	LT-HSC	0.222235929492546	FALSE	TRUE
KLF4	LT-HSC	0.222188766982253	FALSE	TRUE
KLF6	LT-HSC	0.22089858670429	FALSE	TRUE
CHD2	LT-HSC	0.220293740541298	FALSE	TRUE
CHD1	Lymphoid	0.499872861145013	TRUE	TRUE
FOSB	Lymphoid	0.461549915055415	TRUE	TRUE
TCF3	Lymphoid	0.42666361202492	TRUE	TRUE
ARID5A	Lymphoid	0.408650277402077	TRUE	TRUE
SMARCA4	Lymphoid	0.395655808433742	TRUE	TRUE
JUND	Lymphoid	0.377268059432928	TRUE	TRUE
BCL11A	Lymphoid	0.368503340654651	TRUE	TRUE
SF1	Lymphoid	0.338927559880014	TRUE	TRUE
KLF2	Lymphoid	0.327688113229905	TRUE	TRUE
KLF6	Lymphoid	0.323919491108625	TRUE	TRUE
NR3C1	Lymphoid	0.302054151779709	FALSE	TRUE
JUN	Lymphoid	0.295686050810693	FALSE	TRUE
CHD2	Lymphoid	0.281927419639602	FALSE	TRUE
HMGB1	Lymphoid	0.277276603405586	FALSE	TRUE
BCLAF1	Lymphoid	0.272207683729375	FALSE	TRUE
EGR1	Lymphoid	0.266141576300333	FALSE	TRUE
KLF10	Lymphoid	0.264168223170615	FALSE	TRUE
XBP1	Lymphoid	0.263797931942273	FALSE	TRUE
FOS	Lymphoid	0.258904233569852	FALSE	TRUE
MAZ	Lymphoid	0.239094188305321	FALSE	TRUE
YBX1	Lymphoid	0.230875565164359	FALSE	TRUE
E2F1	Lymphoid	0.230133614230048	FALSE	TRUE
ELF1	Lymphoid	0.227855714518902	FALSE	TRUE
REL	Lymphoid	0.226254309180859	FALSE	TRUE
FOSL2	Lymphoid	0.224185275544881	FALSE	TRUE
IRF8	Lymphoid	0.220460305809122	FALSE	TRUE
JUNB	Lymphoid	0.219204705544741	FALSE	TRUE
ATF3	Lymphoid	0.210020948809913	FALSE	TRUE
RUNX1	Lymphoid	0.200244184324839	FALSE	TRUE
CREB1	Lymphoid	0.196475948210598	FALSE	TRUE
MAZ	Mk/Er	0.273617396003111	TRUE	TRUE
YBX1	Mk/Er	0.270388273624654	TRUE	TRUE
HMGB1	Mk/Er	0.26863373337751	TRUE	TRUE
FLI1	Mk/Er	0.246977559906638	TRUE	TRUE
E2F1	Mk/Er	0.231948400517117	TRUE	TRUE
ELF1	Mk/Er	0.219458425276745	TRUE	TRUE
CHD1	Mk/Er	0.209880702884344	TRUE	TRUE
SMARCA4	Mk/Er	0.206377847588973	TRUE	TRUE
TAL1	Mk/Er	0.195155399187328	TRUE	TRUE
MYC	Mk/Er	0.184590539929204	TRUE	TRUE
GATA1	Mk/Er	0.171265272872227	FALSE	TRUE
FOSB	Mk/Er	0.16539404022864	FALSE	TRUE
FOSL2	Mk/Er	0.153900056139946	FALSE	TRUE
KLF2	Mk/Er	0.153460993167434	FALSE	TRUE
CHD2	Mk/Er	0.151157189258133	FALSE	TRUE
E2F3	Mk/Er	0.146802502770377	FALSE	TRUE
SPI1	Mk/Er	0.145913647140249	FALSE	TRUE
SF1	Mk/Er	0.13955637379792	FALSE	TRUE
KLF10	Mk/Er	0.139079444465081	FALSE	TRUE
JUND	Mk/Er	0.138157123239469	FALSE	TRUE
EZH2	Mk/Er	0.13791469068998	FALSE	TRUE
BRCA1	Mk/Er	0.136326807234953	FALSE	TRUE
IRF7	Mk/Er	0.134595877099424	FALSE	TRUE
BCLAF1	Mk/Er	0.131211642204049	FALSE	TRUE
XBP1	Mk/Er	0.129367622611495	FALSE	TRUE
ATF3	Mk/Er	0.12916932670539	FALSE	TRUE
NFE2L2	Mk/Er	0.129077324187111	FALSE	TRUE
FOS	Mk/Er	0.126772279631519	FALSE	TRUE
GATA2	Mk/Er	0.125688794987144	FALSE	TRUE
TCF3	Mk/Er	0.125545384465946	FALSE	TRUE
CHD1	MPP/LMPP	0.439691909471274	TRUE	TRUE
SF1	MPP/LMPP	0.362359022637193	TRUE	TRUE
FOSL2	MPP/LMPP	0.337583046586654	TRUE	TRUE
CHD2	MPP/LMPP	0.322676318605974	TRUE	TRUE
RUNX1	MPP/LMPP	0.31864100814417	TRUE	TRUE
CEBPB	MPP/LMPP	0.314944392587933	TRUE	TRUE
FOSB	MPP/LMPP	0.301173935548917	TRUE	TRUE
BCL11A	MPP/LMPP	0.273448782273967	TRUE	TRUE
JUND	MPP/LMPP	0.266758259069505	TRUE	TRUE
HMGB1	MPP/LMPP	0.261857833027162	TRUE	TRUE
SMARCA4	MPP/LMPP	0.260754617294399	FALSE	TRUE
MAZ	MPP/LMPP	0.259768919479095	FALSE	TRUE
ELF1	MPP/LMPP	0.245357167639175	FALSE	TRUE
STAT3	MPP/LMPP	0.243052378156977	FALSE	TRUE
BCLAF1	MPP/LMPP	0.240833454566002	FALSE	TRUE
YBX1	MPP/LMPP	0.240056381684822	FALSE	TRUE
HMGA2	MPP/LMPP	0.236608936651496	FALSE	TRUE
NR3C1	MPP/LMPP	0.235002631363287	FALSE	TRUE
XBP1	MPP/LMPP	0.225112386974113	FALSE	TRUE
E2F1	MPP/LMPP	0.220846338528915	FALSE	TRUE
KLF2	MPP/LMPP	0.215008485188357	FALSE	TRUE
FOXN3	MPP/LMPP	0.212074126228166	FALSE	TRUE
HOXA9	MPP/LMPP	0.208552591269029	FALSE	TRUE
HOXB2	MPP/LMPP	0.208284283593746	FALSE	TRUE
ARID5A	MPP/LMPP	0.204355619223474	FALSE	TRUE
FOS	MPP/LMPP	0.202221946826559	FALSE	TRUE
REL	MPP/LMPP	0.201174032206179	FALSE	TRUE
JUN	MPP/LMPP	0.201019058120553	FALSE	TRUE
ERG	MPP/LMPP	0.199070729210783	FALSE	TRUE
ETV6	MPP/LMPP	0.198842245175776	FALSE	TRUE
FOSB	Myeloid	0.411049377968817	TRUE	TRUE
CHD1	Myeloid	0.407695431120398	TRUE	TRUE
YBX1	Myeloid	0.379191323326954	TRUE	TRUE
E2F1	Myeloid	0.323927829285429	TRUE	TRUE
HMGB1	Myeloid	0.310995729534194	TRUE	TRUE
MAZ	Myeloid	0.304478183625195	TRUE	TRUE
SMARCA4	Myeloid	0.291922637566409	TRUE	TRUE
JUND	Myeloid	0.291234927927177	TRUE	TRUE
ARID5A	Myeloid	0.277696339921223	TRUE	TRUE
SF1	Myeloid	0.267891688174136	TRUE	TRUE
BCL11A	Myeloid	0.265347184170759	FALSE	TRUE
KLF2	Myeloid	0.263015557991856	FALSE	TRUE
FOSL2	Myeloid	0.258512720322373	FALSE	TRUE
BCLAF1	Myeloid	0.257575505930274	FALSE	TRUE
RUNX1	Myeloid	0.248597125729122	FALSE	TRUE
JUN	Myeloid	0.24800486857782	FALSE	TRUE
KLF6	Myeloid	0.241845117264559	FALSE	TRUE
CEBPB	Myeloid	0.240686951646464	FALSE	TRUE
FOS	Myeloid	0.232517428046605	FALSE	TRUE
EGR1	Myeloid	0.231637113049566	FALSE	TRUE
CHD2	Myeloid	0.223966676239147	FALSE	TRUE
KLF10	Myeloid	0.219213306475707	FALSE	TRUE
CEBPA	Myeloid	0.217361546326022	FALSE	TRUE
XBP1	Myeloid	0.216466742296681	FALSE	TRUE
NR3C1	Myeloid	0.212869900616651	FALSE	TRUE
ATF3	Myeloid	0.203658955977806	FALSE	TRUE
MYC	Myeloid	0.202556294856628	FALSE	TRUE
ELF1	Myeloid	0.19666101729292	FALSE	TRUE
STAT3	Myeloid	0.19569907058661	FALSE	TRUE
RUNX2	Myeloid	0.194323293131178	FALSE	TRUE
CHD1	T cell	0.388650563038166	TRUE	TRUE
FOSB	T cell	0.356650888048657	TRUE	TRUE
JUND	T cell	0.334280475020933	TRUE	TRUE
KLF2	T cell	0.33425501960685	TRUE	TRUE
CHD2	T cell	0.330579405889289	TRUE	TRUE
SF1	T cell	0.310511509463832	TRUE	TRUE
ARID5A	T cell	0.294788401231328	TRUE	TRUE
ETS1	T cell	0.285931776961874	TRUE	TRUE
RUNX3	T cell	0.283851247495585	TRUE	TRUE
LEF1	T cell	0.283319608310415	TRUE	TRUE
JUN	T cell	0.276523155227856	FALSE	TRUE
KLF6	T cell	0.261756899929701	FALSE	TRUE
DDIT3	T cell	0.258250801493943	FALSE	TRUE
BCLAF1	T cell	0.239228461135042	FALSE	TRUE
JUNB	T cell	0.234742739927556	FALSE	TRUE
REL	T cell	0.23052604204091	FALSE	TRUE
EGR1	T cell	0.227952555278949	FALSE	TRUE
SMARCA4	T cell	0.219090699170898	FALSE	TRUE
KLF13	T cell	0.214948572663168	FALSE	TRUE
HMGB1	T cell	0.213705280914864	FALSE	TRUE
NR3C1	T cell	0.211354241915887	FALSE	TRUE
GATA3	T cell	0.211129133512337	FALSE	TRUE
BCL11A	T cell	0.211049624104917	FALSE	TRUE
IRF8	T cell	0.208545488059451	FALSE	TRUE
FOS	T cell	0.20679541498465	FALSE	TRUE
FOXP1	T cell	0.202752595348357	FALSE	TRUE
KLF10	T cell	0.20170032132585	FALSE	TRUE
XBP1	T cell	0.198916369519898	FALSE	TRUE
MAZ	T cell	0.197345203612989	FALSE	TRUE
STAT3	T cell	0.190331004545886	FALSE	TRUE

## Sheet: Supplemental Table S8
Neonates clinical information summary
	DNA Methylation Cohort	CTRL (n=34)	LGA (n=36)	p-value	CTRL Cohort 1 (n=18)	CTRL Cohort 2 (n=16)	p-value	LGA Cohort 1 (n=20)	LGA Cohort 2 (n=16)	p-value
	Maternal Age (Yrs)	27.0588	30.5	*	27.0588	27.0588		30.5	30.8529
	Gestational Age (Wks)	39.1559	39.2361		39.1559	39.2		39.25	39.2667
	Sex	47	56		45	48		56	59
	Birth Weight (g)	3141.06	3997.25	***	3135.94	3155.03		4007.24	3998.42
	Birth Length (cm)	48.5809	49.7431	**	48.5076	48.65		49.6985	49.6083
	Neonate Head Circumference (cm)	33.8103	35.3057	***	33.8348	33.8638		35.3545	35.3172
	Neonate Ponderal Index	2.73598	3.24893	***	2.74344	2.71189		3.26475	3.25492
	Gene expression Hematomap (no multiplexed)	CTRL (n=7)
	Maternal Age (Yrs)	29
	Gestational Age (Wks)	39.1559
	Sex	57
	Birth Weight (g)	3105
	Birth Length (cm)	48.4
	Neonate Head Circumference (cm)	33.9
	Neonate Ponderal Index	2.73598
	Gene expression HTO cohort for DEGs	CTRL (n=8)	LGA (n=6)	p-value
	Maternal Age (Yrs)	32	30
	Gestational Age (Wks)	39.1559	39.2361
	Sex	25	50
	Birth Weight (g)	3242	4535	**
	Birth Length (cm)	49.3	50.8
	Neonate Head Circumference (cm)	33.5	35.9	*
	Neonate Ponderal Index	2.73598	3.4	***
	Chromatin Configuration cohort	CTRL (n=5)	LGA (n=6)	p-value
	Maternal Age (Yrs)	31	33
	Gestational Age (Wks)	39	38.4
	Sex	50	40
	Birth Weight (g)	3073	4335	**
	Birth Length (cm)	48.1	50.3
	Neonate Head Circumference (cm)	33.8	35.9	*
	Neonate Ponderal Index	2.7	3.4	**

## Sheet: Supplemental Table S9
Number of cells per sample
scRNA-seq
sample	sex	group	HTO	number of cells
CBP547	Female	CTRL	FALSE	6469
CBP549	Male	LGA	TRUE	2452
CBP532	Female	LGA	TRUE	911
CBP539	Male	CTRL	TRUE	1350
CBP528	Female	CTRL	TRUE	688
CBP523	Female	CTRL	TRUE	198
CBP555	Male	CTRL	TRUE	610
CBP551	Female	LGA	TRUE	738
CBP543	Female	LGA	TRUE	996
CBP537	Male	CTRL	TRUE	467
CBP518	Male	CTRL	TRUE	672
CBP544	Female	CTRL	FALSE	2081
CBP545	Female	CTRL	FALSE	873
CBP541	Female	CTRL	FALSE	2322
CBP555	Male	CTRL	FALSE	1976
CBP518	Male	CTRL	FALSE	2005
CBP537	Male	CTRL	FALSE	2795
CBP530	Male	CTRL	TRUE	1184
CBP496	Male	LGA	TRUE	1558
CBP503	Male	CTRL	TRUE	655
CBP556	Male	LGA	TRUE	206
scATAC-seq
sample	sex	group	number of cells
CBP555	M	CTRL	2320
CBP518	M	CTRL
CBP537	M	CTRL
CBP551	F	LGA	3529
CBP543	F	LGA
CBP544	F	CTRL	932
CBP545	F	CTRL
CBP541	F	CTRL
CBP556	M	LGA	1952
CBP533	M	LGA
CBP526	M	LGA
